# Supplementary material
Source: PubMed Central journal article supplement (PMC4185120)
Supplement: mmc2.pdf [file mmc2.pdf]

# Genome-wide Association Study Identifies Five Susceptibility Loci for Follicular Lymphoma outside the HLA Region

Christine F. Skibola,<sup>1,2,84,\*</sup> Sonja I. Berndt,<sup>3,84</sup> Joseph Vijai,<sup>4,84</sup> Lucia Conde,<sup>1,2,84</sup> Zhaoming Wang,<sup>5,84</sup> Meredith Yeager,<sup>5,84</sup> Paul I.W. de Bakker,<sup>6,7</sup> Brenda M. Birmann,<sup>8</sup> Claire M. Vajdic,<sup>9</sup> Jia-Nee Foo,<sup>10</sup> Paige M. Bracci,<sup>11</sup> Roel C.H. Vermeulen,<sup>7,12</sup> Susan L. Slager,<sup>13</sup> Silvia de Sanjose,<sup>14,15</sup> Sophia S. Wang,<sup>16</sup> Martha S. Linet,<sup>3</sup> Gilles Salles,<sup>17,18,19</sup> Qing Lan,<sup>3</sup> Gianluca Severi,<sup>20,21,22</sup> Henrik Hjalgrim,<sup>23</sup> Tracy Lightfoot,<sup>24</sup> Mads Melbye,<sup>23,25</sup> Jian Gu,<sup>26</sup> Hervé Ghesquières,<sup>19,27</sup> Brian K. Link,<sup>28</sup> Lindsay M. Morton,<sup>3</sup> Elizabeth A. Holly,<sup>11</sup> Alex Smith,<sup>24</sup> Lesley F. Tinker,<sup>29</sup> Lauren R. Teras,<sup>30</sup> Anne Krickler,<sup>31</sup> Nikolaus Becker,<sup>32</sup> Mark P. Purdue,<sup>3</sup> John J. Spinelli,<sup>33,34</sup> Yawei Zhang,<sup>35</sup> Graham G. Giles,<sup>21,22</sup> Paolo Vineis,<sup>20,36</sup> Alain Monnereau,<sup>37,38,39</sup> Kimberly A. Bertrand,<sup>8,40</sup> Demetrius Albanes,<sup>3</sup> Anne Zeleniuch-Jacquotte,<sup>41,42</sup> Attilio Gabbas,<sup>43</sup> Charles C. Chung,<sup>3</sup> Laurie Burdett,<sup>5</sup> Amy Hutchinson,<sup>5</sup> Charles Lawrence,<sup>44</sup> Rebecca Montalvan,<sup>44</sup> Liming Liang,<sup>40,45</sup> Jinyan Huang,<sup>40</sup> Baoshan Ma,<sup>40,46</sup> Jianjun Liu,<sup>10</sup> Hans-Olov Adami,<sup>40,47</sup> Bengt Glimelius,<sup>48,49</sup> Yuanqing Ye,<sup>26</sup> Grzegorz S. Nowakowski,<sup>13</sup> Ahmet Dogan,<sup>50</sup> Carrie A. Thompson,<sup>51</sup> Thomas M. Habermann,<sup>51</sup> Anne J. Novak,<sup>51</sup> Mark Liebow,<sup>51</sup> Thomas E. Witzig,<sup>51</sup> George J. Weiner,<sup>28</sup> Maryjean Schenk,<sup>52</sup> Patricia Hartge,<sup>3</sup> Anneclaire J. De Roos,<sup>29,53</sup> Wendy Cozen,<sup>54,55</sup> Degui Zhi,<sup>56</sup> Nicholas K. Akers,<sup>2</sup> Jacques Riby,<sup>1,2</sup> Martyn T. Smith,<sup>2</sup> Mortimer Lacher,<sup>4</sup> Danylo J. Villano,<sup>4</sup> Ann Maria,<sup>4</sup> Eve Roman,<sup>24</sup> Eleanor Kane,<sup>24</sup> Rebecca D. Jackson,<sup>57</sup> Kari E. North,<sup>58,59</sup> W. Ryan Diver,<sup>30</sup> Jenny Turner,<sup>60,61</sup> Bruce K. Armstrong,<sup>31</sup> Yolanda Benavente,<sup>14,15</sup> Paolo Boffetta,<sup>62</sup> Paul Brennan,<sup>63</sup> Lenka Foretova,<sup>64</sup> Marc Maynadie,<sup>65</sup> Anthony Staines,<sup>66</sup> James McKay,<sup>67</sup> Angela R. Brooks-Wilson,<sup>68,69</sup> Tongzhang Zheng,<sup>35</sup> Theodore R. Holford,<sup>70</sup> Saioa Chamosa,<sup>71</sup> Rudolph Kaaks,<sup>32</sup> Rachel S. Kelly,<sup>36,40</sup> Bodil Ohlsson,<sup>72</sup> Ruth C. Travis,<sup>73</sup> Elisabete Weiderpass,<sup>47,74,75,76</sup> Jacqueline Clavel,<sup>37,38</sup> Edward Giovannucci,<sup>8,40,77</sup> Peter Kraft,<sup>40,45</sup> Jarmo Virtamo,<sup>78</sup> Patrizio Mazza,<sup>79</sup> Pierluigi Cocco,<sup>43</sup> Maria Grazia Ennas,<sup>80</sup> Brian C.H. Chiu,<sup>81</sup> Joseph F. Fraumeni, Jr.,<sup>3</sup> Alexandra Nieters,<sup>82,85</sup> Kenneth Offit,<sup>4,85</sup> Xifeng Wu,<sup>26,85</sup> James R. Cerhan,<sup>13,85</sup> Karin E. Smedby,<sup>83,85</sup> Stephen J. Chanock,<sup>3,85</sup> and Nathaniel Rothman<sup>3,85</sup>

<sup>1</sup>Department of Epidemiology, School of Public Health and Comprehensive Cancer Center, Birmingham, AL 35233, USA; <sup>2</sup>Division of Environmental Health Sciences, University of California Berkeley School of Public Health, Berkeley, CA 94720, USA; <sup>3</sup>Division of Cancer Epidemiology and Genetics, National Cancer Institute, NIH, Bethesda, MD 20892, USA; <sup>4</sup>Department of Medicine, Memorial Sloan Kettering Cancer Center, New York, NY 10065, USA; <sup>5</sup>Cancer Genomics Research Laboratory, Division of Cancer Epidemiology and Genetics, National Cancer Institute, NIH, Gaithersburg, MD 20877, USA; <sup>6</sup>Department of Medical Genetics and of Epidemiology, University Medical Center Utrecht, Utrecht 3584 CG, the Netherlands; <sup>7</sup>Julius Center for Health Sciences and Primary Care, University Medical Center Utrecht, Utrecht 3584 CX, the Netherlands; <sup>8</sup>Channing Division of Network Medicine, Department of Medicine, Brigham and Women's Hospital and Harvard Medical School, Boston, MA 02115, USA; <sup>9</sup>Prince of Wales Clinical School, University of New South Wales, Sydney, NSW 2052, Australia; <sup>10</sup>Human Genetics, Genome Institute of Singapore, Singapore 138672, Singapore; <sup>11</sup>Department of Epidemiology & Biostatistics, University of California, San Francisco, San Francisco, CA 94118, USA; <sup>12</sup>Institute for Risk Assessment Sciences, Utrecht University, Utrecht 3508 TD, the Netherlands; <sup>13</sup>Department of Health Sciences Research, Mayo Clinic, Rochester, MN 55905, USA; <sup>14</sup>Unit of Infections and Cancer (UNIC), Cancer Epidemiology Research Programme, Institut Català d'Oncologia, IDIBELL, Barcelona 8907, Spain; <sup>15</sup>Centro de Investigación Biomédica en Red de Epidemiología y Salud Pública (CIBERESP), Barcelona 8036, Spain; <sup>16</sup>Department of Cancer Etiology, City of Hope Beckman Research Institute, Duarte, CA 91030, USA; <sup>17</sup>Department of Hematology, Hospices Civils de Lyon, Pierre benite Cedex 69495, France; <sup>18</sup>Department of Hematology, Université Lyon-1, Pierre benite Cedex 69495, France; <sup>19</sup>Laboratoire de Biologie Moléculaire de la Cellule UMR 5239, Centre National de la Recherche Scientifique, Pierre benite Cedex 69495, France; <sup>20</sup>Human Genetics Foundation, Turin 10126, Italy; <sup>21</sup>Cancer Epidemiology Centre, Cancer Council Victoria, Melbourne, VIC 3053, Australia; <sup>22</sup>Centre for Epidemiology and Biostatistics, Melbourne School of Population and Global Health, University of Melbourne, Carlton, VIC 3010, Australia; <sup>23</sup>Department of Epidemiology Research, Division of Health Surveillance and Research, Statens Serum Institut, Copenhagen 2300, Denmark; <sup>24</sup>Department of Health Sciences, University of York, York YO10 5DD, UK; <sup>25</sup>Department of Medicine, Stanford University School of Medicine, Stanford, CA 94305, USA; <sup>26</sup>Department of Epidemiology, M.D. Anderson Cancer Center, Houston, TX 77030, USA; <sup>27</sup>Department of Hematology, Centre Léon Bérard, Lyon 69008, France; <sup>28</sup>Department of Internal Medicine, Carver College of Medicine, The University of Iowa, Iowa City, IA 52242, USA; <sup>29</sup>Division of Public Health Sciences, Fred Hutchinson Cancer Research Center, Seattle, WA 98117, USA; <sup>30</sup>Epidemiology Research Program, American Cancer Society, Atlanta, GA 30303, USA; <sup>31</sup>Sydney School of Public Health, The University of Sydney, Sydney, NSW 2006, Australia; <sup>32</sup>Division of Cancer Epidemiology, German Cancer Research Center (DKFZ), Heidelberg, Baden-Württemberg 69120, Germany; <sup>33</sup>Cancer Control Research, BC Cancer Agency, Vancouver, BC V5Z 1L3, Canada; <sup>34</sup>School of Population and Public Health, University of British Columbia, Vancouver, BC V6T 1Z3, Canada; <sup>35</sup>Department of Environmental Health Sciences, Yale School of Public Health, New Haven, CT 06520, USA; <sup>36</sup>MRC-PHE Centre for Environment and Health, School of Public Health, Imperial College London, London W2 1PG, UK; <sup>37</sup>Environmental Epidemiology of Cancer Group, Inserm, Centre for Research in Epidemiology and Population Health (CESP), U1018, Villejuif Cedex 94807, France; <sup>38</sup>UMRS 1018, Université Paris Sud, Villejuif Cedex 94807, France; <sup>39</sup>Registre des hémapathies malignes de la Gironde, Institut Bergonié, Bordeaux Cedex 33076, France; <sup>40</sup>Department of Epidemiology, Harvard School of Public Health, Boston, MA 02115, USA; <sup>41</sup>Department of Population Health, New York University School of Medicine, New York, NY 10016, USA; <sup>42</sup>Cancer Institute, New York University School of Medicine, New York, NY 10016, USA; <sup>43</sup>Department of Public Health, Clinical and Molecular Medicine, University of Cagliari, Monserrato, Cagliari 09042, Italy; <sup>44</sup>Health Studies Sector, Westat, Rockville, MD 20850, USA; <sup>45</sup>Department of Biostatistics, Harvard School of Public

Genome-wide association studies (GWASs) of follicular lymphoma (FL) have previously identified human leukocyte antigen (HLA) gene variants. To identify additional FL susceptibility loci, we conducted a large-scale two-stage GWAS in 4,523 case subjects and 13,344 control subjects of European ancestry. Five non-HLA loci were associated with FL risk: 11q23.3 (rs4938573,  $p = 5.79 \times 10^{-20}$ ) near *CXCR5*; 11q24.3 (rs4937362,  $p = 6.76 \times 10^{-11}$ ) near *ETSI*; 3q28 (rs6444305,  $p = 1.10 \times 10^{-10}$ ) in *LPP*; 18q21.33 (rs17749561,  $p = 8.28 \times 10^{-10}$ ) near *BCL2*; and 8q24.21 (rs13254990,  $p = 1.06 \times 10^{-8}$ ) near *PVT1*. In an analysis of the HLA region, we identified four linked HLA-DR $\beta$ 1 multiallelic amino acids at positions 11, 13, 28, and 30 that were associated with FL risk ( $p_{\text{omnibus}} = 4.20 \times 10^{-67}$  to  $2.67 \times 10^{-70}$ ). Additional independent signals included rs17203612 in HLA class II (odds ratio [OR]<sub>per-allele</sub> = 1.44;  $p = 4.59 \times 10^{-16}$ ) and rs13130437 in HLA class I (OR<sub>per-allele</sub> = 1.23;  $p = 8.23 \times 10^{-9}$ ). Our findings further expand the number of loci associated with FL and provide evidence that multiple common variants outside the HLA region make a significant contribution to FL risk.

Follicular lymphoma (FL [MIM 613024]) is a common B cell malignancy characterized by a variable indolent clinical course that can take decades to manifest and, in some cases, can be followed by transformation to aggressive diffuse large B cell lymphoma (DLBCL).<sup>1,2</sup> The previous genome-wide association studies (GWASs) of relatively small sample sizes have revealed FL susceptibility loci in the human leukocyte antigen (HLA) class I and class II regions on 6p21.32-33.<sup>3-7</sup> To identify new FL susceptibility loci, we genotyped 2,301 FL case subjects and 2,854 control subjects of European descent from 22 studies (NCI FL GWAS) as part of a larger initiative using the Illumina OmniExpress Beadchip (Table S1; Figure S1 available online). All studies obtained informed consent from participants and approval from the respective Institutional Review Boards for this study. Cases were ascertained from cancer registries, clinics, or hospitals or through self-report verified by medical and pathology reports (Table S1). The phenotype information for all cases was reviewed centrally at the International Lymphoma Epidemiology Consortium (InterLymph) Data Coordinating Center, and cases were classified according to the proposed scheme by the InterLymph Pathology Working Group based on

the World Health Organization (WHO) classification (2008) (Table S1). Genotypes were called using Illumina GenomeStudio software, and quality-control duplicates showed >99% concordance. All initial data analyses and management were conducted using the Genotyping Library and Utilities (GLU), and extensive quality-control metrics were applied to the data. Specifically, monomorphic SNPs and SNPs with call rates <93% were removed, and samples with call rates  $\leq 93\%$ , mean heterozygosity <0.25 or >0.33 based on the autosomal SNPs, or gender discordance (>5% heterozygosity on the X chromosome for males and <20% heterozygosity on the X chromosome for females) were excluded. Unexpected duplicates (>99.9% concordance) and first-degree relatives on the basis of identity-by-descent sharing with  $\text{Pi-hat} > 0.40$  were removed. Ancestry was assessed using the GLU struct.admix module, and participants with <80% European ancestry were also excluded (Figure S2). After these quality-control steps, 94% of the participants and 611,844 SNPs remained for analysis (Tables S2 and S3). Genotype data previously generated on the Illumina Omni2.5 BeadChip<sup>8</sup> from an additional 3,536 control subjects from 3 of the 22 studies (ATBC, CPSII, and PLCO) were

Health, Boston, MA 02115, USA; <sup>46</sup>College of Information Science and Technology, Dalian Maritime University, Dalian, Liaoning Province 116026, China; <sup>47</sup>Department of Medical Epidemiology and Biostatistics, Karolinska Institutet, Stockholm 17177, Sweden; <sup>48</sup>Department of Oncology and Pathology, Karolinska Institutet, Karolinska University Hospital Solna, Stockholm 17176, Sweden; <sup>49</sup>Department of Radiology, Oncology and Radiation Science, Uppsala University, Uppsala 75105, Sweden; <sup>50</sup>Departments of Laboratory Medicine and Pathology, Memorial Sloan Kettering Cancer Center, New York, NY 10065, USA; <sup>51</sup>Department of Medicine, Mayo Clinic, Rochester, MN 55905, USA; <sup>52</sup>Department of Family Medicine and Public Health Sciences, Wayne State University, Detroit, MI 48201, USA; <sup>53</sup>Department of Environmental and Occupational Health, Drexel University School of Public Health, Philadelphia, PA 19104, USA; <sup>54</sup>Department of Preventive Medicine, USC Keck School of Medicine, University of Southern California, Los Angeles, CA 90033, USA; <sup>55</sup>Norris Comprehensive Cancer Center, USC Keck School of Medicine, University of Southern California, Los Angeles, CA 90033, USA; <sup>56</sup>Department of Biostatistics, University of Alabama at Birmingham, Birmingham, AL 35233, USA; <sup>57</sup>Division of Endocrinology, Diabetes and Metabolism, The Ohio State University, Columbus, OH 43210, USA; <sup>58</sup>Department of Epidemiology, University of North Carolina at Chapel Hill, Chapel Hill, NC 27599, USA; <sup>59</sup>Carolina Center for Genome Sciences, University of North Carolina at Chapel Hill, Chapel Hill, NC 27599, USA; <sup>60</sup>Department of Anatomical Pathology, Australian School of Advanced Medicine, Macquarie University, Sydney, NSW 2109, Australia; <sup>61</sup>Department of Histopathology, Douglass Hanly Moir Pathology, Macquarie Park, NSW 2113, Australia; <sup>62</sup>The Tisch Cancer Institute, Icahn School of Medicine at Mount Sinai, New York, NY 10029, USA; <sup>63</sup>Group of Genetic Epidemiology, Section of Genetics, International Agency for Research on Cancer, Lyon 69372, France; <sup>64</sup>Department of Cancer Epidemiology and Genetics, Masaryk Memorial Cancer Institute and MF MU, Brno 656 53, Czech Republic; <sup>65</sup>EA 4184, Registre des Hémopathies Malignes de Côte d'Or, University of Burgundy and Dijon University Hospital, Dijon 21070, France; <sup>66</sup>School of Nursing and Human Sciences, Dublin City University, Dublin 9, Ireland; <sup>67</sup>Genetic Cancer Susceptibility Group, Section of Genetics, International Agency for Research on Cancer, Lyon 69372, France; <sup>68</sup>Genome Sciences Centre, BC Cancer Agency, Vancouver, BC V5Z 1L3, Canada; <sup>69</sup>Department of Biomedical Physiology and Kinesiology, Simon Fraser University, Burnaby, BC V5A 1S6, Canada; <sup>70</sup>Department of Biostatistics, Yale School of Public Health, New Haven, CT 06520, USA; <sup>71</sup>Health Department, BioDonostia Research Institute, Basque Region 20014, Spain; <sup>72</sup>Department of Clinical Sciences, Division of Internal Medicine, Skåne University Hospital, Lund University, Malmö 205 02, Sweden; <sup>73</sup>Cancer Epidemiology Unit, University of Oxford, Oxford OX3 7LE, UK; <sup>74</sup>Department of Community Medicine, Faculty of Health Sciences, University of Tromsø, Breivika 9037, Norway; <sup>75</sup>Cancer Registry of Norway, Oslo 0304, Norway; <sup>76</sup>Department of Genetic Epidemiology, Folkhalsan Research Center, Helsinki 00250, Finland; <sup>77</sup>Department of Nutrition, Harvard School of Public Health, Boston, MA 02115, USA; <sup>78</sup>Department of Chronic Disease Prevention, National Institute for Health and Welfare, Helsinki 00271, Finland; <sup>79</sup>Department of Hematology, Ospedale Nord, Taranto 74100, Italy; <sup>80</sup>Department of Biomedical Science, University of Cagliari, Monserrato, Cagliari 09042, Italy; <sup>81</sup>Department of Health Studies, University of Chicago, Chicago, IL 60637, USA; <sup>82</sup>Center for Chronic Immunodeficiency, University Medical Center Freiburg, Freiburg, Baden-Württemberg 79108, Germany; <sup>83</sup>Department of Medicine Solna, Karolinska Institutet, Stockholm 17176, Sweden

<sup>84</sup>These authors contributed equally to this work

<sup>85</sup>These authors contributed equally to this work in a supervisory role

\*Correspondence: cskibola@uab.edu

<http://dx.doi.org/10.1016/j.ajhg.2014.09.004>. ©2014 by The American Society of Human Genetics. All rights reserved.

**Table 1. Association Results for Loci and SNPs Associated with Risk of Follicular Lymphoma**

| Chr                                 | Nearest Gene(s) | SNP                         | Position <sup>a</sup> | Risk Allele <sup>b</sup> | Other Allele | RAF <sup>c</sup> | Stage | OR (95% CI)      | p                      | Phet <sup>d</sup>       | I <sup>2</sup> <sup>e</sup> |       |
|-------------------------------------|-----------------|-----------------------------|-----------------------|--------------------------|--------------|------------------|-------|------------------|------------------------|-------------------------|-----------------------------|-------|
| <b>Known Locus</b>                  |                 |                             |                       |                          |              |                  |       |                  |                        |                         |                             |       |
| 6p21.32                             | HLA region      | rs12195582<br>(rs115374828) | 32444544              | T                        | C            | 0.465            | NCI   | 1.88 (1.74–2.02) | $3.26 \times 10^{-58}$ | –                       | –                           |       |
|                                     |                 |                             |                       |                          |              |                  | 0.498 | previous GWAS    | 1.55 (1.33–1.80)       | $1.10 \times 10^{-8}$   |                             |       |
|                                     |                 |                             |                       |                          |              |                  | 0.435 | replication      | 1.75 (1.60–1.90)       | $1.17 \times 10^{-37}$  |                             |       |
|                                     |                 |                             |                       |                          |              |                  | –     | combined         | 1.78 (1.69–1.88)       | $5.36 \times 10^{-100}$ | $2.75 \times 10^{-1}$       | 19.56 |
| <b>Genome-wide Significant Loci</b> |                 |                             |                       |                          |              |                  |       |                  |                        |                         |                             |       |
| 11q23.3                             | CXCR5           | rs4938573                   | 118741842             | C                        | T            | 0.204            | NCI   | 1.30 (1.19–1.43) | $5.97 \times 10^{-9}$  | –                       | –                           |       |
|                                     |                 |                             |                       |                          |              |                  | 0.193 | previous GWAS    | 1.37 (1.14–1.64)       | 0.0008                  |                             |       |
|                                     |                 |                             |                       |                          |              |                  | 0.188 | replication      | 1.39 (1.25–1.54)       | $3.17 \times 10^{-10}$  |                             |       |
|                                     |                 |                             |                       |                          |              |                  | –     | combined         | 1.34 (1.26–1.43)       | $5.79 \times 10^{-20}$  | $7.69 \times 10^{-1}$       | 0.00  |
| 11q24.3                             | ETS1            | rs4937362                   | 128492739             | T                        | C            | 0.456            | NCI   | 1.16 (1.08–1.25) | $7.01 \times 10^{-5}$  | –                       | –                           |       |
|                                     |                 |                             |                       |                          |              |                  | 0.465 | previous GWAS    | 1.33 (1.16–1.54)       | $5.90 \times 10^{-5}$   |                             |       |
|                                     |                 |                             |                       |                          |              |                  | 0.467 | replication      | 1.17 (1.08–1.28)       | 0.0002                  |                             |       |
|                                     |                 |                             |                       |                          |              |                  | –     | combined         | 1.19 (1.13–1.25)       | $6.76 \times 10^{-11}$  | $7.52 \times 10^{-1}$       | 0.00  |
| 3q28                                | LPP             | rs6444305                   | 188299902             | G                        | A            | 0.276            | NCI   | 1.16 (1.08–1.27) | 0.0002                 | –                       | –                           |       |
|                                     |                 |                             |                       |                          |              |                  | 0.269 | previous GWAS    | 1.30 (1.06–1.59)       | 0.01                    |                             |       |
|                                     |                 |                             |                       |                          |              |                  | 0.281 | replication      | 1.25 (1.14–1.37)       | $2.21 \times 10^{-6}$   |                             |       |
|                                     |                 |                             |                       |                          |              |                  | –     | combined         | 1.21 (1.14–1.28)       | $1.10 \times 10^{-10}$  | $4.42 \times 10^{-1}$       | 0.00  |
| 18q21.33                            | BCL2            | rs17749561                  | 60783211              | G                        | A            | 0.910            | NCI   | 1.43 (1.25–1.61) | $2.18 \times 10^{-7}$  | –                       | –                           |       |
|                                     |                 |                             |                       |                          |              |                  | 0.908 | previous GWAS    | 1.23 (0.96–1.57)       | $1.10 \times 10^{-1}$   |                             |       |
|                                     |                 |                             |                       |                          |              |                  | 0.905 | replication      | 1.28 (1.10–1.49)       | 0.002                   |                             |       |
|                                     |                 |                             |                       |                          |              |                  | –     | combined         | 1.34 (1.22–1.47)       | $8.28 \times 10^{-10}$  | $5.43 \times 10^{-2}$       | 49.37 |
| 8q24.21                             | PVT1            | rs13254990                  | 129076451             | T                        | C            | 0.315            | NCI   | 1.20 (1.11–1.30) | $8.39 \times 10^{-6}$  | –                       | –                           |       |
|                                     |                 |                             |                       |                          |              |                  | 0.307 | previous GWAS    | 1.15 (0.98–1.34)       | 0.08                    |                             |       |
|                                     |                 |                             |                       |                          |              |                  | 0.315 | replication      | 1.16 (1.06–1.27)       | 0.001                   |                             |       |
|                                     |                 |                             |                       |                          |              |                  | –     | combined         | 1.18 (1.11–1.24)       | $1.06 \times 10^{-8}$   | $6.99 \times 10^{-1}$       | 0.00  |
| <b>Suggestive Loci</b>              |                 |                             |                       |                          |              |                  |       |                  |                        |                         |                             |       |
| 17q25.3                             | C17orf62        | rs3751913                   | 80405552              | C                        | T            | 0.121            | NCI   | 1.25 (1.11–1.39) | 0.0001                 | –                       | –                           |       |
|                                     |                 |                             |                       |                          |              |                  | 0.126 | previous GWAS    | 1.42 (1.16–1.75)       | 0.0008                  |                             |       |
|                                     |                 |                             |                       |                          |              |                  | 0.121 | replication      | 1.14 (1.01–1.29)       | 0.04                    |                             |       |
|                                     |                 |                             |                       |                          |              |                  | –     | combined         | 1.23 (1.14–1.33)       | $2.24 \times 10^{-7}$   | $2.59 \times 10^{-1}$       | 21.50 |
| 3q13.33                             | CD86            | rs2681416                   | 121817613             | A                        | G            | 0.311            | NCI   | 1.24 (1.15–1.35) | $6.73 \times 10^{-8}$  | –                       | –                           |       |
|                                     |                 |                             |                       |                          |              |                  | 0.305 | previous GWAS    | 1.15 (0.99–1.34)       | 0.06                    |                             |       |
|                                     |                 |                             |                       |                          |              |                  | 0.329 | replication      | 1.06 (0.97–1.15)       | 0.23                    |                             |       |
|                                     |                 |                             |                       |                          |              |                  | –     | combined         | 1.16 (1.09–1.22)       | $2.33 \times 10^{-7}$   | $5.54 \times 10^{-4}$       | 72.83 |
| 18q12.3                             | SLC14A2         | rs11082438                  | 42865210              | G                        | T            | 0.936            | NCI   | 1.39 (1.18–1.61) | $4.65 \times 10^{-5}$  | –                       | –                           |       |
|                                     |                 |                             |                       |                          |              |                  | 0.941 | previous GWAS    | 1.46 (1.07–1.99)       | 0.02                    |                             |       |
|                                     |                 |                             |                       |                          |              |                  | 0.935 | replication      | 1.22 (1.02–1.46)       | 0.03                    |                             |       |
|                                     |                 |                             |                       |                          |              |                  | –     | combined         | 1.33 (1.19–1.48)       | $4.01 \times 10^{-7}$   | $9.26 \times 10^{-1}$       | 0.00  |

<sup>a</sup>Position according to human reference NCBI37/hg19.<sup>b</sup>Allele associated with an increased risk of FL.<sup>c</sup>Risk allele frequency in controls.<sup>d</sup>Cochran's Q test heterogeneity p value.<sup>e</sup>I<sup>2</sup> heterogeneity index.

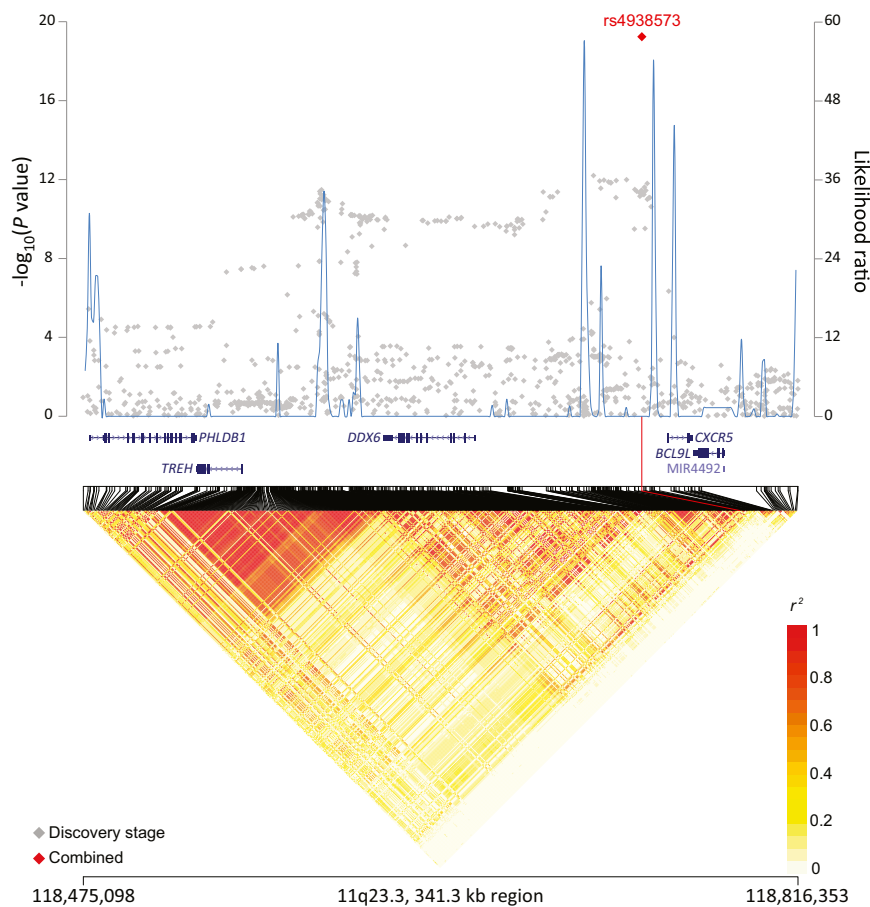

**Figure 1. Regional Plots of the FL-Associated Locus rs4938573 in 11q23.3**

Figure shows the association results from the NCI FL GWAS and stages 1 and 2 combined (red diamond), recombination hotspots, and LD plots.

(Table S2), and association testing was conducted separately for each study using SNPTTEST v.2 adjusted for age, sex, and significant principal components.

Association results from the NCI FL GWAS and the two previously genotyped GWASs (totaling 2,728 case subjects, 7,758 control subjects in stage 1) were analyzed in a meta-analysis using a fixed-effects inverse-variance method based on the  $\beta$  estimates and standard errors from each study. Only SNPs with information scores  $>0.3$  were included in the meta-analysis. In the stage 1 meta-analysis, we identified three non-HLA loci (11q23.3, 11q24.3, and 3q13.33) that reached genome-wide significance ( $p < 5 \times 10^{-8}$ ). To confirm these loci and discover additional loci, 11 non-HLA SNPs with  $p < 5 \times 10^{-6}$  from the stage 1 meta-analysis

also included, resulting in a total of 2,142 FL case subjects and 6,221 control subjects for analysis (NCI FL GWAS; Table S4).

To evaluate population substructure, a principal components analysis was conducted using the GLU struct.pca module. Plots of the top principal components are shown in Figure S3. Association testing was conducted assuming a log-additive genetic model adjusted for age, sex, and significant principal components. A quantile-quantile plot of the association results revealed an enrichment of SNPs with small  $p$  values even after removal of all SNPs in the HLA region, which has been previously reported to be associated with FL ( $\lambda = 1.018$ , Figure S4). In addition to the HLA region, one locus on 11q23.3 reached genome-wide statistical significance ( $p < 5 \times 10^{-8}$ ) (Figure S5).

To increase power to detect associations in stage 1, we added data on 586 FL case subjects and 1,537 control subjects from two independent previously published GWASs (UCSF2<sup>4</sup> and SCALE<sup>3</sup>) to the newly genotyped NCI FL GWAS (Tables S1 and S4; Figure S1). Because different genotyping platforms were used (Table S2), we imputed all three GWASs (NCI, UCSF2, SCALE) using the 1000 Genomes Project (1kGP) v.3 (March 2012 release) reference panel<sup>9</sup> and IMPUTE2.<sup>10</sup> The genotype data underwent rigorous quality control filters before imputation

were chosen for replication in stage 2. Only SNPs with a MAF  $> 1\%$  were considered for replication, and no SNPs were taken forward for replication in regions where they appeared to be singletons or obvious artifacts. Stage 2 replication was undertaken in a new set of 1,795 FL case subjects and 5,586 control subjects, which included 119 case subjects and 349 control subjects from another GWAS (UCSF1/NHS) genotyped on the OmniExpress microarray and imputed using IMPUTE2<sup>10</sup> and the 1kGP data,<sup>9</sup> and 1,676 cases and 5,237 controls with de novo genotyping (Tables S1, S2, and S4). All 11 SNPs were either directly genotyped or had a high imputation information score (average information score = 0.92). Genotyping of these 11 SNPs by TaqMan (Applied Biosystems) in 470 subjects from the NCI GWAS yielded  $>88.9\%$  concordance with the imputed dosages (median concordance = 99.6%), indicating that imputation accuracy was high. Association testing was conducted for each study using either GLU (de novo genotyping) or SNPTTEST (UCSF1/NHS), adjusting for relevant factors.

Results from the stage 1 and 2 studies were then meta-analyzed using a fixed effects model. In the combined meta-analysis, we found five non-HLA loci that achieved genome-wide significance ( $p < 5 \times 10^{-8}$ ) at 11q23.3 (rs4938573,  $p = 5.79 \times 10^{-20}$ ), 11q24.3 (rs4937362,  $p = 6.76 \times 10^{-11}$ ), 3q28 (rs6444305,  $p = 1.10 \times 10^{-10}$ ),



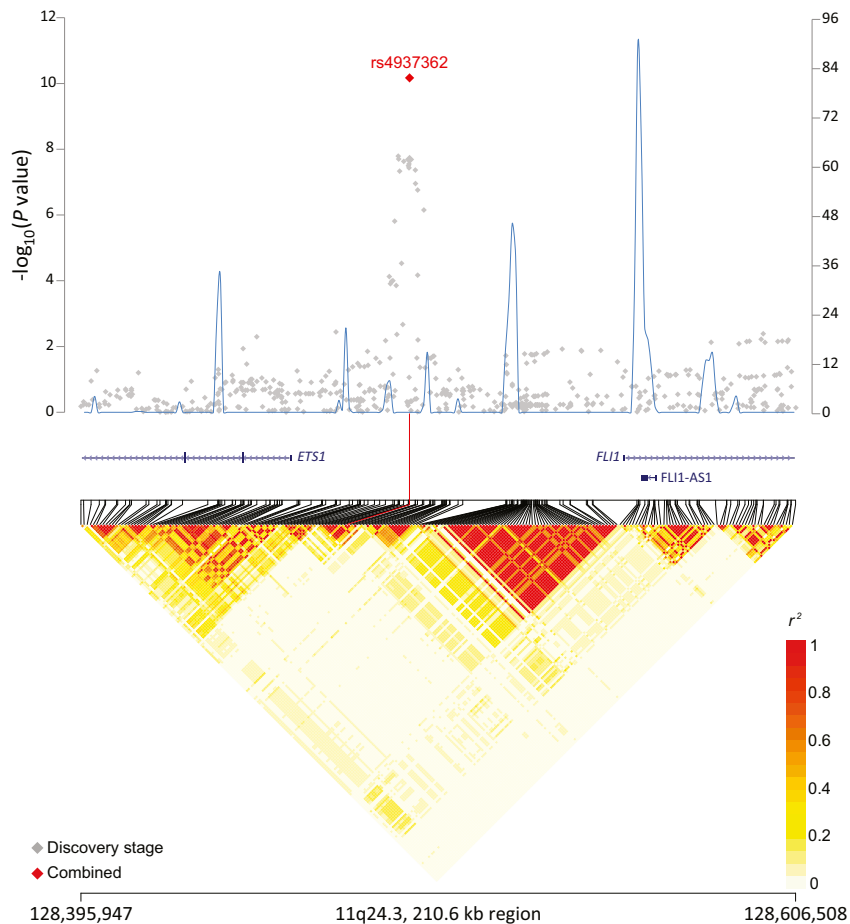

**Figure 2. Regional Plots of the FL-Associated Locus rs4937362 in 11q24.3**

Figure shows the association results from the NCI NHL GWAS and stages 1 and 2 combined (red diamond), recombination hotspots, and LD plots.

8q24.21 maps near the oncogene, plasmacytoma variant translocation 1 gene (*PVT1* [MIM 165140]) (Figure 5). Characteristics of these loci are presented in Table S5. The suggestive SNP rs3751913 is in chromosome 17 opening reading frame 62 (*C17orf62*); rs2681416 is in CD86 molecule (*CD86*) (MIM 601020); and rs11082438 is in solute carrier 14A2 (*SLC14A2* [MIM 601611]) (Table 1, Figure S6). Using the Cochran's Q test and by estimating the  $I^2$  heterogeneity index, no substantial heterogeneity was observed among the studies for any SNP ( $p_{\text{heterogeneity}} \geq 0.05$ ) except for the suggestive locus, rs2681416 at 3q13.33 (Table 1). Although the p value for heterogeneity for rs13254990 was borderline significant, all of the effect estimates for the individual studies were above 1.0.

18q21.33 (rs17749561,  $p = 8.28 \times 10^{-10}$ ), and 8q24.21 (rs13254990,  $p = 1.06 \times 10^{-8}$ ); and three suggestive loci ( $p < 5 \times 10^{-7}$ ) at 17q25.3 (rs3751913,  $p = 2.24 \times 10^{-7}$ ), 3q13.33 (rs2681416,  $p = 2.33 \times 10^{-7}$ ), and 18q12.3 (rs11082438,  $p = 4.01 \times 10^{-7}$ ) (Table 1). Two of the five loci that reached genome-wide significance in the stage 1 and 2 meta-analysis (11q23.3 and 11q24.3) were genome-wide significant in the stage 1 meta-analysis and were robustly replicated in stage 2 ( $p = 3.17 \times 10^{-10}$  and  $p = 0.0002$ , respectively). The remaining three loci achieved genome-wide significance after inclusion of the stage 2 data and therefore would benefit from further validation in other independent samples.

rs4938573 at 11q23.3 maps 12.6 kb upstream of the chemokine (c-x-c motif) receptor 5 gene (*CXCR5* [MIM 601613]) (Figure 1). The 11q24.3 locus marked by rs4937362 ( $p = 6.76 \times 10^{-11}$ ) is approximately 35 kb upstream of v-ets avian erythroblastosis virus E26 oncogene homolog 1 (*ETS1* [MIM 164720]) (Figure 2). The 3q28 locus marked by rs6444305 maps to a region that overlaps the LIM domain containing preferred translocation partner in lipoma (*LPP* [MIM 600700]) and is 836.4 kb upstream of *BCL6* (MIM 109565) (Figure 3). rs17749561 in 18q21.33 is located 7.4 kb downstream of the antiapoptotic oncogene, B cell CLL/lymphoma 2 (*BCL2* [MIM 151430]) (Figure 4); and rs13254990 at

To explore potential functional roles for associated SNPs and their surrogates ( $r^2 > .80$ ) and to assess the B cell-specific chromatin dynamics of regions overlapping with the associated SNPs, we conducted HaploReg<sup>11</sup> and ChromoS analyses.<sup>12,13</sup> Here we found that three loci, 11q23.3, 3q13.33, and 8q24.21, were annotated as overlapping enhancers in the lymphoblastoid cell line GM12878,<sup>14</sup> suggesting that our GWAS signals map to variants that overlap within regions of active chromatin state in B cells (Table S6; Figure S7). However, an expression quantitative trait loci (eQTL) analysis using publicly available RNA sequencing data on lymphoblastoid cell lines (available from the Gene Expression Omnibus [GEO] repository under accession number GSE16921) yielded no notable ( $FDR < 0.05$ ) associations of the selected SNPs with gene expression levels. Additional analysis using microarray data (GEO accession number GSE8052) did not reveal any significant eQTL associations for the genome-wide significant loci, although the suggestive SNP, rs3751913, was associated with *C17orf62* expression (data not shown). Thus, further work is needed to identify and characterize the biological basis of these FL susceptibility alleles.

Consistent with previous smaller reports, the strongest effects on FL risk were observed in the HLA region at 6p21.32-33, where 8,104 SNPs achieved genome-wide

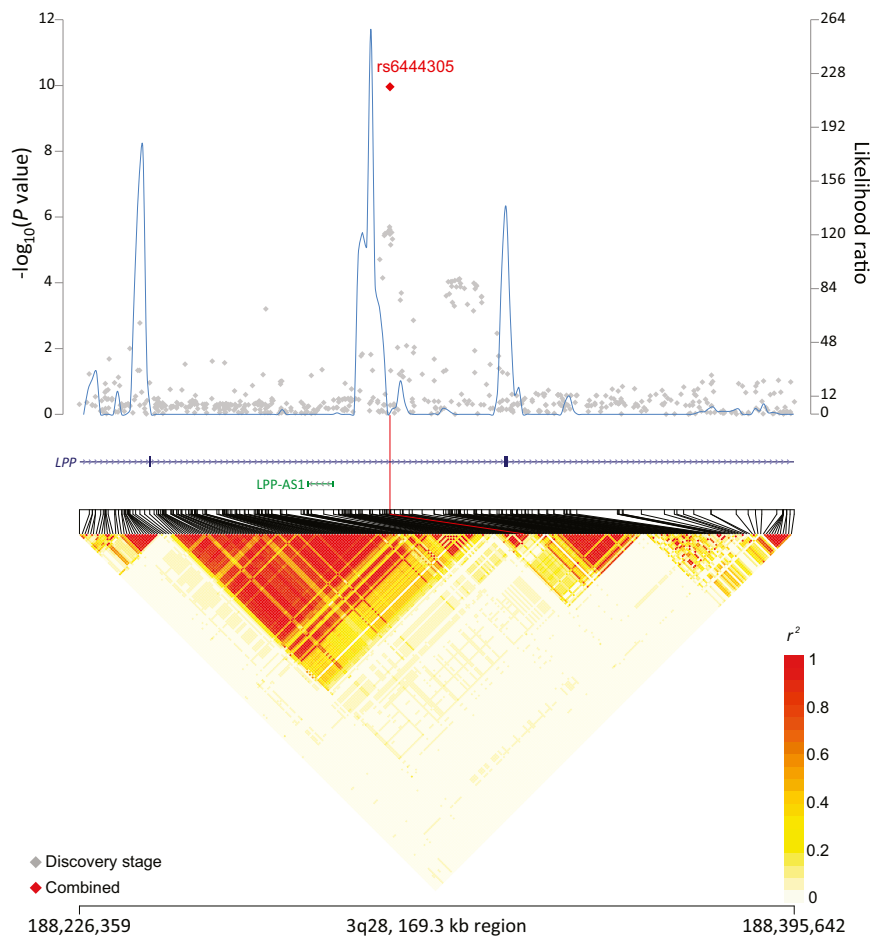

**Figure 3. Regional Plots of the Associated Locus rs6444305 in 3q28**

Figure shows the association results from the NCI FL GWAS and stages 1 and 2 combined (red diamond), recombination hotspots, and LD plots.

“multiallelic” with three to six different residues present at each position, were successfully imputed (information score  $> 0.3$  for SNPs or  $r^2 > 0.3$  for alleles and AAs) and available for downstream analysis. Association testing was conducted using PLINK,<sup>18</sup> where multiallelic markers were analyzed as binary markers (e.g., allele present or absent). A meta-analysis was conducted where we tested SNPs, HLA alleles, and AAs across the HLA region for association to FL. Among the imputed AAs and HLA alleles tested, the top associated signal mapped to a DR $\beta$ 1 AA at position 28 that carries three possible amino acids: Glu, Asp, and His. Asp was associated with low (OR = 0.53;  $p = 6.1 \times 10^{-72}$ ) and Glu with high (OR = 1.86;  $p = 7.99 \times 10^{-69}$ ) FL risk (Table S7). Global omnibus tests of position 28 ( $2.49 \times 10^{-67} \leq p \leq 3.84 \times 10^{-67}$ )

significance ( $p < 5 \times 10^{-8}$ ) in the stage 1 meta-analysis (Figure S8). One top SNP, rs12195582, was carried forward for replication in stage 2 and reached a combined  $p = 5.36 \times 10^{-100}$  in stages 1+2 (Table 1). To further refine the association of HLA variants with FL risk and determine whether specific coding variants within HLA genes contributed to the diverse association signals, we imputed classical HLA alleles and amino acids (AAs) at seven loci (*HLA-A* [MIM 142800], *HLA-B* [MIM 142830], *HLA-C* [MIM 142840], *HLA-DQA1* [MIM 146880], *HLA-DQB1* [MIM 604305], *HLA-DRB1* [MIM 142857], and *HLA-DPB1* [MIM 142858]) on the four GWAS data sets from stages 1+2 (NCI, USCF2, SCALE, UCSF1/NHS) using SNP2HLA<sup>15</sup> and a reference panel from the Type 1 Diabetes Genetics Consortium (T1DGC) consisting of genotype data from 5,225 individuals of European descent that were typed for classical HLA alleles. The imputation accuracy of HLA types was high ( $>95.23\%$ ) when compared to HLA sequencing data on a subset of NCI and UCSF2 samples scanned as part of this study.<sup>16,17</sup> Due to the limited number of SNPs (7,253) in the T1DGC reference set, imputation of HLA SNPs was conducted with IMPUTE2 and the 1kGP reference set. A total of 68,488 SNPs, 201 classical HLA alleles (two- and four-digit resolution), and 1,038 AA markers including 103 AA positions that were

and other nearby DR $\beta$ 1 AA positions at 11, 13, and 30 yielded statistically similar associations with FL risk (Table S9). These results support the previously reported association between FL and DR $\beta$ 1 position 13 in a small study of Europeans.<sup>19</sup> However, due to the high LD between positions 11, 13, 28, and 30, we were unable to determine the significance of one position at the exclusion of the other through reciprocal conditional analyses. The most significant imputed two- or four-digit HLA allele in our analysis was *DRB1\*01* (OR = 1.85;  $p = 2.57 \times 10^{-42}$ ) (Table S7), encoded by Glu28, Cys30, Phe13, and Leu11 (Table S9). An association with FL risk was found for *HLA-DRB1\*07:01* that is also encoded by residues at 11, 13, 28, and 30 ( $p = 1.59 \times 10^{-20}$ ) (Table S9). Positions 11, 13, 28, and 30 reside in the middle of the HLA-DR heterodimer molecule in the peptide binding cleft (Figure S9) that specifically impact binding pockets 4, 6, and 7. These are key peptide binding anchors in DR $\beta$ 1<sup>20</sup> that influence binding preferences of alleles,<sup>21</sup> suggesting an important role for DR $\beta$ 1 peptide presentation in follicular lymphomagenesis.

To identify independent HLA variants controlling for DR $\beta$ 1 28 (used as a surrogate for the 11, 13, 28, and 30 group), we included all genotyped and imputed HLA SNPs, AAs, and alleles in a forward stepwise analysis. The most significant variant after controlling for DR $\beta$ 1 28 was

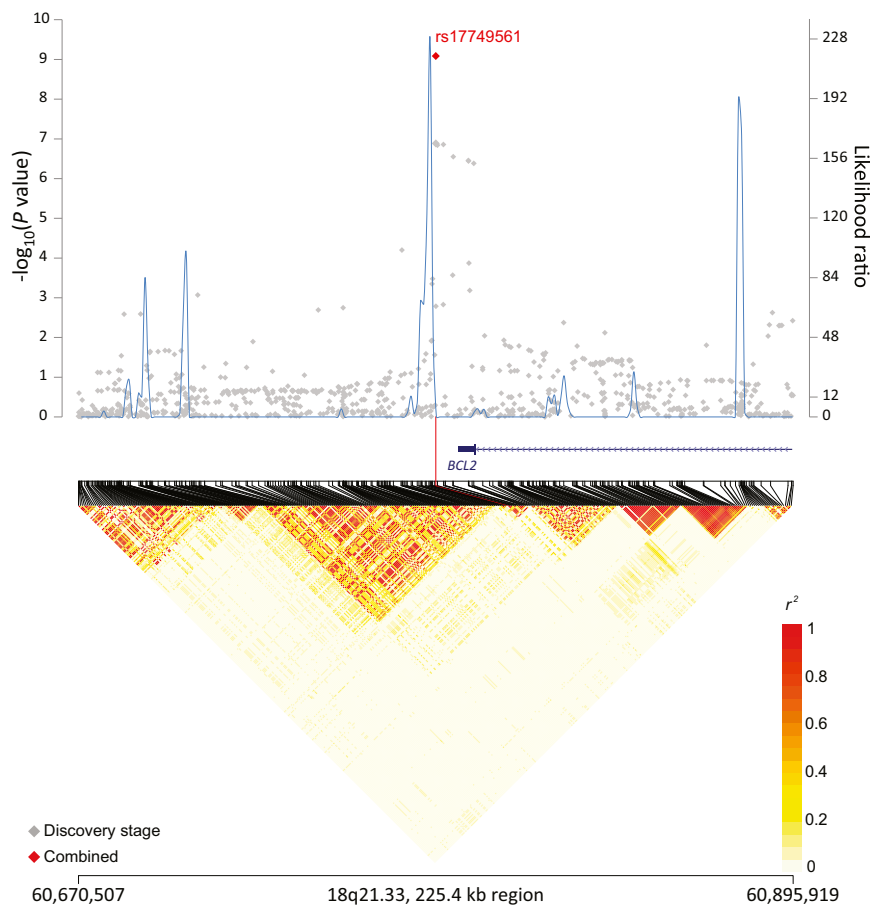

**Figure 4. Regional Plots of the Associated Locus rs17749561 in 18q21.33**

Figure shows the association results from the NCI FL GWAS and stages 1 and 2 combined (red diamond), recombination hotspots, and LD plots.

613503], *BTNL2* [MIM 606000], *C6orf25*); and with rs3130439, a proxy for rs3130437, in HLA class I (*PSORS1C2*, *PSORS1C3*, *DPCR1* [MIM 613928]) (Table S12). Of note, ten of the rs17203612-linked SNPs that showed correlation with higher *HLA-DQB1* expression also showed correlation with lower *HLA-DQB1* methylation levels (Table S12) that further supports the potential role of HLA class II FL-associated SNPs in *HLA-DQB1* regulation.<sup>24,25</sup> Additional eQTL analyses using microarray data also suggested potential eQTL associations with *HLA-C*, *TCF19* (MIM 600912), and *HLA-B* expression (Table S14). However, we did not observe significant enrichment of particular regulatory markers within these associated regions, although overlap with some regulatory signals was observed (Table S15).

rs17203612 ( $p = 4.59 \times 10^{-16}$ ), an intergenic SNP 39.2 kb and 99.7 kb downstream of *HLA-DRA* (MIM 142860) and *HLA-DRB1*, respectively (Figure 6; Table S10). A conditional analysis on DR $\beta$ 1 28 and rs17203612 revealed that the next most statistically significant variant was rs3130437 ( $p = 8.23 \times 10^{-9}$ ) located 15.6 kb downstream of *HLA-C* in HLA class I (Figure 6; Table S10). After controlling for DR $\beta$ 1 28, rs17203612, and rs3130437, no additional signals with  $p < 5 \times 10^{-8}$  were observed (Figure 6). Of note, we did see a residual signal ( $p = 8.18 \times 10^{-6}$ ) at the functionally relevant DP $\beta$ 1 Glu84 position,<sup>22</sup> a reported risk locus for Hodgkin lymphoma.<sup>23</sup> A conditional analysis of DR $\beta$ 1 28, rs17203612, and rs3130437 eliminated the majority of residual effects for the previously reported HLA SNPs and alleles associated with FL (Table S11).

We conducted a series of preliminary bioinformatics analyses to explore the potential functional relevance of rs17203612 and rs3130437 using publicly available RNA sequencing expression and methylation data and found significant (FDR < 0.05) gene expression and methylation differences associated with rs17203612- and rs3130437-linked SNPs (Tables S12 and S13). Specifically, we found significant gene expression changes associated with rs12194148, a proxy for rs17203612, in class II (*HLA-DRB5* [MIM 604776], *HLA-DRB6*, *HLA-DRB1*, *HLA-DQB1*, *HLA-DQB2* [MIM 615161], *HLA-DQA1*, *HLA-DQA2* [MIM

In summary, our study identified five non-HLA susceptibility alleles that were robustly associated with FL risk. Moreover, our work highlights the important role of HLA structural variants and regulatory SNPs in the etiology of FL, advances the catalog of HLA and non-HLA genetic variants associated with FL risk, and provides further evidence for a role of DR $\beta$ 1 peptide presentation in FL. Functional studies will be required to elucidate the biological basis of these loci and to determine their role in follicular lymphomagenesis.

### Supplemental Data

Supplemental Data include 9 figures, 15 tables, and Supplemental Acknowledgments and can be found with this article online at <http://dx.doi.org/10.1016/j.ajhg.2014.09.004>.

### Acknowledgments

The overall FL GWAS project was supported by the intramural program of the Division of Cancer Epidemiology and Genetics, National Cancer Institute, NIH. A full list of Supplemental Acknowledgments is provided online.

Received: July 17, 2014

Accepted: September 10, 2014

Published: October 2, 2014

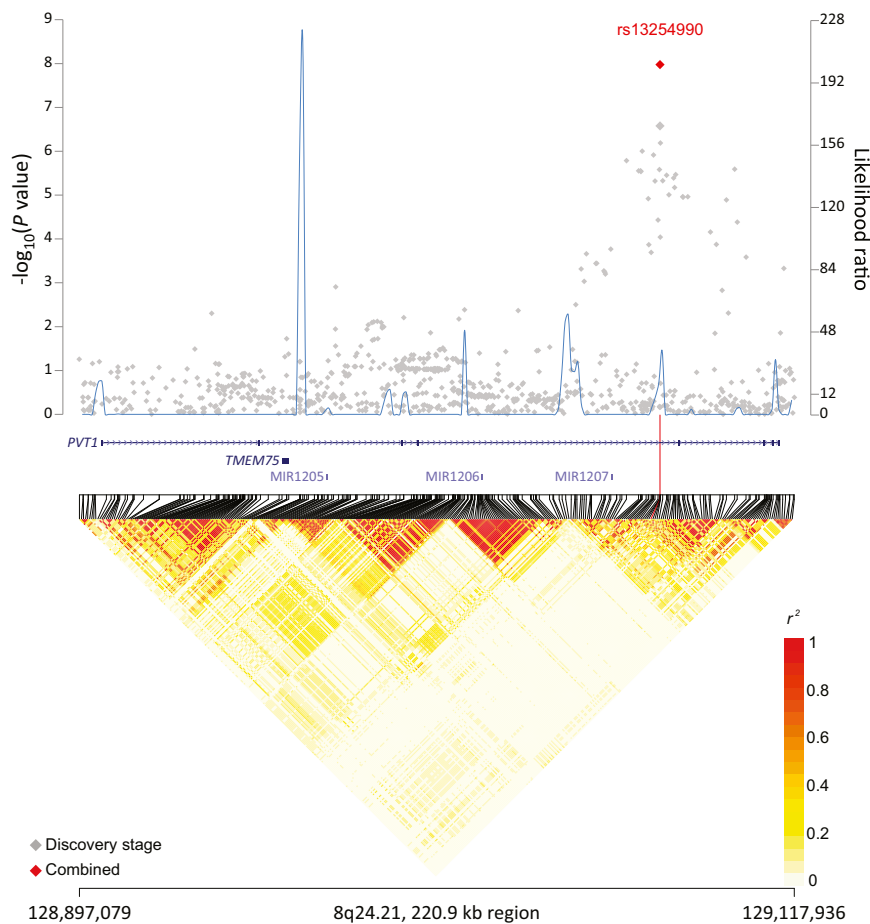

**Figure 5. Regional Plots of the Associated Locus rs13254990 in 8q24.21**

Figure shows the association results from the NCI FL GWAS and stages 1 and 2 combined (red diamond), recombination hot-spots, and LD plots.

## Web Resources

The URLs for data presented herein are as follows:

1000 Genomes, <http://browser.1000genomes.org>  
 ChroMoS, <http://epicenter.immunbio.mpg.de/services/chromos>  
 Gene Expression Omnibus (GEO), <http://www.ncbi.nlm.nih.gov/geo/>  
 glu-genetics, <https://code.google.com/p/glu-genetics/>  
 HaploReg, <http://www.broadinstitute.org/mammals/haploreg/haploreg.php>  
 IMPUTE2, [http://mathgen.stats.ox.ac.uk/impute/impute\\_v2.html](http://mathgen.stats.ox.ac.uk/impute/impute_v2.html)  
 Online Mendelian Inheritance in Man (OMIM), <http://www.omim.org/>  
 PLINK, <http://pngu.mgh.harvard.edu/~purcell/plink/>  
 SNP2HLA, <https://www.broadinstitute.org/mpg/snp2hla/>  
 snptest, [https://mathgen.stats.ox.ac.uk/genetics\\_software/snptest/old/snptest.html](https://mathgen.stats.ox.ac.uk/genetics_software/snptest/old/snptest.html)

## References

- Link, B.K., Maurer, M.J., Nowakowski, G.S., Ansell, S.M., Macon, W.R., Syrbu, S.I., Slager, S.L., Thompson, C.A., Inwards, D.J., Johnston, P.B., et al. (2013). Rates and outcomes of follicular lymphoma transformation in the immunochemotherapy era: a report from the University of Iowa/MayoClinic Specialized Program of Research Excellence Molecular Epidemiology Resource. *J. Clin. Oncol.* *31*, 3272–3278.
- Tan, D., Horning, S.J., Hoppe, R.T., Levy, R., Rosenberg, S.A., Sigal, B.M., Warnke, R.A., Natkunam, Y., Han, S.S., Yuen, A., et al. (2013). Improvements in observed and relative survival in follicular grade 1-2 lymphoma during 4 decades: the Stanford University experience. *Blood* *122*, 981–987.
- Smedby, K.E., Foo, J.N., Skibola, C.F., Darabi, H., Conde, L., Hjalgrim, H., Kumar, V., Chang, E.T., Rothman, N., Cerhan, J.R., et al. (2011). GWAS of follicular lymphoma reveals allelic heterogeneity at 6p21.32 and suggests shared genetic susceptibility with diffuse large B-cell lymphoma. *PLoS Genet.* *7*, e1001378.
- Conde, L., Halperin, E., Akers, N.K., Brown, K.M., Smedby, K.E., Rothman, N., Nieters, A., Slager, S.L., Brooks-Wilson, A., Agana, L., et al. (2010). Genome-wide association study of follicular lymphoma identifies a risk locus at 6p21.32. *Nat. Genet.* *42*, 661–664.
- Skibola, C.F., Bracci, P.M., Halperin, E., Conde, L., Craig, D.W., Agana, L., Iyadurai, K., Becker, N., Brooks-Wilson, A., Curry, J.D., et al. (2009). Genetic variants at 6p21.33 are associated with susceptibility to follicular lymphoma. *Nat. Genet.* *41*, 873–875.
- Vijai, J., Kirchhoff, T., Schrader, K.A., Brown, J., Dutra-Clarke, A.V., Manschreck, C., Hansen, N., Rau-Murthy, R., Sarrel, K., Przybylo, J., et al. (2013). Susceptibility loci associated with specific and shared subtypes of lymphoid malignancies. *PLoS Genet.* *9*, e1003220.
- Skibola, C.F., Conde, L., Foo, J.N., Riby, J., Humphreys, K., Sillé, F.C., Darabi, H., Sanchez, S., Hjalgrim, H., Liu, J., et al.



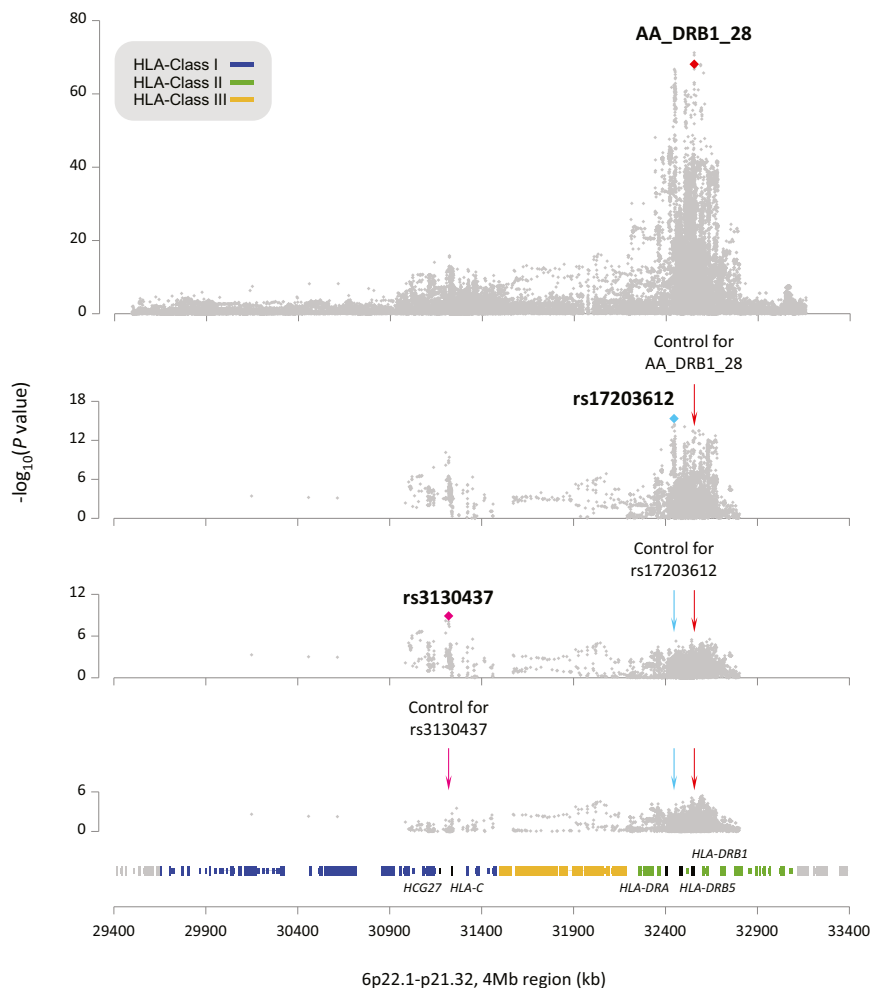

**Figure 6. Sequential Conditioned Association Analysis in the HLA Region at 6p22.1-21.32: 29,400–33,400 kb**

Each gray diamond represents the p value from the meta-analysis of the four GWASs. Among all the AAs and HLA alleles tested, the top associated signal mapped to the AA DRβ1 at position 28 (top). After conditioning on DRβ1 28, rs17203612 in the HLA class II region was the marker with the highest association (second from top). Further analysis conditioning on both signals revealed rs3130437 in HLA class I as the most significant associated marker (second from bottom). No additional genome-wide significant signals were observed after controlling for the effects of DRβ1 28, rs17203612, and rs3130437 (bottom). Plots derived using genome assembly hg19.

(2012). A meta-analysis of genome-wide association studies of follicular lymphoma. *BMC Genomics* 13, 516.

8. Wang, Z., Jacobs, K.B., Yeager, M., Hutchinson, A., Sampson, J., Chatterjee, N., Albanes, D., Berndt, S.I., Chung, C.C., Diver, W.R., et al. (2012). Improved imputation of common and uncommon SNPs with a new reference set. *Nat. Genet.* 44, 6–7.
9. Abecasis, G.R., Altshuler, D., Auton, A., Brooks, L.D., Durbin, R.M., Gibbs, R.A., Hurles, M.E., and McVean, G.A.; 1000 Genomes Project Consortium (2010). A map of human genome variation from population-scale sequencing. *Nature* 467, 1061–1073.
10. Howie, B.N., Donnelly, P., and Marchini, J. (2009). A flexible and accurate genotype imputation method for the next generation of genome-wide association studies. *PLoS Genet.* 5, e1000529.
11. Ward, L.D., and Kellis, M. (2012). HaploReg: a resource for exploring chromatin states, conservation, and regulatory motif alterations within sets of genetically linked variants. *Nucleic Acids Res.* 40 (Database issue), D930–D934.
12. Barenboim, M., and Manke, T. (2013). ChroMoS: an integrated web tool for SNP classification, prioritization and functional interpretation. *Bioinformatics* 29, 2197–2198.
13. Ernst, J., Kheradpour, P., Mikkelson, T.S., Shores, N., Ward, L.D., Epstein, C.B., Zhang, X., Wang, L., Issner, R., Coyne, M., et al. (2011). Mapping and analysis of chromatin state dynamics in nine human cell types. *Nature* 473, 43–49.
14. Consortium, E.P., Bernstein, B.E., Birney, E., Dunham, I., Green, E.D., Gunter, C., and Snyder, M.; ENCODE Project Consortium (2012). An integrated encyclopedia of DNA elements in the human genome. *Nature* 489, 57–74.
15. Jia, X., Han, B., Onengut-Gumuscu, S., Chen, W.M., Concannon, P.J., Rich, S.S., Raychaudhuri, S., and de Bakker, P.I. (2013). Imputing amino acid polymorphisms in human leukocyte antigens. *PLoS ONE* 8, e64683.
16. Wang, S.S., Abdou, A.M., Morton, L.M., Thomas, R., Cerhan, J.R., Gao, X., Cozen, W., Rothman, N., Davis, S., Severson, R.K., et al. (2010). Human leukocyte antigen class I and II alleles in non-Hodgkin lymphoma etiology. *Blood* 115, 4820–4823.
17. Skibola, C.F., Akers, N.K., Conde, L., Ladner, M., Hawbecker, S.K., Cohen, F., Ribas, F., Erlich, H.A., Goodridge, D., Trachtenberg, E.A., et al. (2012). Multi-locus HLA class I and II allele and haplotype associations with follicular lymphoma. *Tissue Antigens* 79, 279–286.
18. Purcell, S., Neale, B., Todd-Brown, K., Thomas, L., Ferreira, M.A., Bender, D., Maller, J., Sklar, P., de Bakker, P.I., Daly, M.J., and Sham, P.C. (2007). PLINK: a tool set for whole-genome association and population-based linkage analyses. *Am. J. Hum. Genet.* 81, 559–575.
19. Foo, J.N., Smedby, K.E., Akers, N.K., Berglund, M., Irwan, I.D., Jia, X., Li, Y., Conde, L., Darabi, H., Bracci, P.M., et al. (2013). Coding variants at hexa-allelic amino acid 13 of HLA-DRB1

- explain independent SNP associations with follicular lymphoma risk. *Am. J. Hum. Genet.* *93*, 167–172.
20. Stern, L.J., Brown, J.H., Jardetzky, T.S., Gorga, J.C., Urban, R.G., Strominger, J.L., and Wiley, D.C. (1994). Crystal structure of the human class II MHC protein HLA-DR1 complexed with an influenza virus peptide. *Nature* *368*, 215–221.
21. Rapin, N., Hoof, I., Lund, O., and Nielsen, M. (2010). The MHC motif viewer: a visualization tool for MHC binding motifs. *Curr. Protoc. Immunol. Unit* *18*, 17.
22. Díaz, G., Amicosante, M., Jaraquemada, D., Butler, R.H., Guillén, M.V., Sánchez, M., Nombela, C., and Arroyo, J. (2003). Functional analysis of HLA-DP polymorphism: a crucial role for DPbeta residues 9, 11, 35, 55, 56, 69 and 84-87 in T cell allorecognition and peptide binding. *Int. Immunol.* *15*, 565–576.
23. Taylor, G.M., Gokhale, D.A., Crowther, D., Woll, P.J., Harris, M., Ryder, D., Ayres, M., and Radford, J.A. (1999). Further investigation of the role of HLA-DPB1 in adult Hodgkin's disease (HD) suggests an influence on susceptibility to different HD subtypes. *Br. J. Cancer* *80*, 1405–1411.
24. Conde, L., Bracci, P.M., Richardson, R., Montgomery, S.B., and Skibola, C.F. (2013). Integrating GWAS and expression data for functional characterization of disease-associated SNPs: an application to follicular lymphoma. *Am. J. Hum. Genet.* *92*, 126–130.
25. Sillé, F.C., Conde, L., Zhang, J., Akers, N.K., Sanchez, S., Maltbaek, J., Riby, J.E., Smith, M.T., and Skibola, C.F. (2014). Follicular lymphoma-protective HLA class II variants correlate with increased HLA-DQB1 protein expression. *Genes Immun.* *15*, 133–136.

## **Genome-wide Association Study Identifies Five Susceptibility Loci for Follicular Lymphoma outside the HLA Region**

**Christine F. Skibola, Sonja I. Berndt, Joseph Vijai, Lucia Conde, Zhaoming Wang, Meredith Yeager, Paul I.W. de Bakker, Brenda M. Birman, Claire M. Vajdic, Jia-Nee Foo, Paige M. Bracci, Roel C.H. Vermeulen, Susan L. Slager, Silvia de Sanjose, Sophia S. Wang, Martha S. Linet, Gilles Salles, Qing Lan, Gianluca Severi, Henrik Hjalgrim, Tracy Lightfoot, Mads Melbye, Jian Gu, Hervé Ghesquière, Brian K. Link, Lindsay M. Morton, Elizabeth A. Holly, Alex Smith, Lesley F. Tinker, Lauren R. Teras, Anne Kriker, Nikolaus Becker, Mark P. Purdue, John J. Spinelli, Yawei Zhang, Graham G. Giles, Paolo Vineis, Alain Monnereau, Kimberly A. Bertrand, Demetrius Albanes, Anne Zeleniuch-Jacquotte, Attilio Gabbas, Charles C. Chung, Laurie Burdett, Amy Hutchinson, Charles Lawrence, Rebecca Montalvan, Liming Liang, Jinyan Huang, Baoshan Ma, Jianjun Liu, Hans-Olov Adami, Bengt Glimelius, Yuanqing Ye, Grzegorz S. Nowakowski, Ahmet Dogan, Carrie A. Thompson, Thomas M. Habermann, Anne J. Novak, Mark Liebow, Thomas E. Witzig, George J. Weiner, Maryjean Schenk, Patricia Hartge, Anneclaire J. De Roos, Wendy Cozen, Degui Zhi, Nicholas K. Akers, Jacques Riby, Martyn T. Smith, Mortimer Lacher, Danylo J. Villano, Ann Maria, Eve Roman, Eleanor Kane, Rebecca D. Jackson, Kari E. North, W. Ryan Diver, Jenny Turner, Bruce K. Armstrong, Yolanda Benavente, Paolo Boffetta, Paul Brennan, Lenka Foretova, Marc Maynadie, Anthony Staines, James McKay, Angela R. Brooks-Wilson, Tongzhang Zheng, Theodore R. Holford, Saioa Chamosa, Rudolph Kaaks, Rachel S. Kelly, Bodil Ohlsson, Ruth C. Travis, Elisabete Weiderpass, Jacqueline Clavel, Edward Giovannucci, Peter Kraft, Jarmo Virtamo, Patrizio Mazza, Pierluigi Cocco, Maria Grazia Ennas, Brian C.H. Chiu, Joseph F. Fraumeni, Jr., Alexandra Nieters, Kenneth Offit, Xifeng Wu, James R. Cerhan, Karin E. Smedby, Stephen J. Chanock, and Nathaniel Rothman**

## 1. SUPPLEMENTAL FIGURES

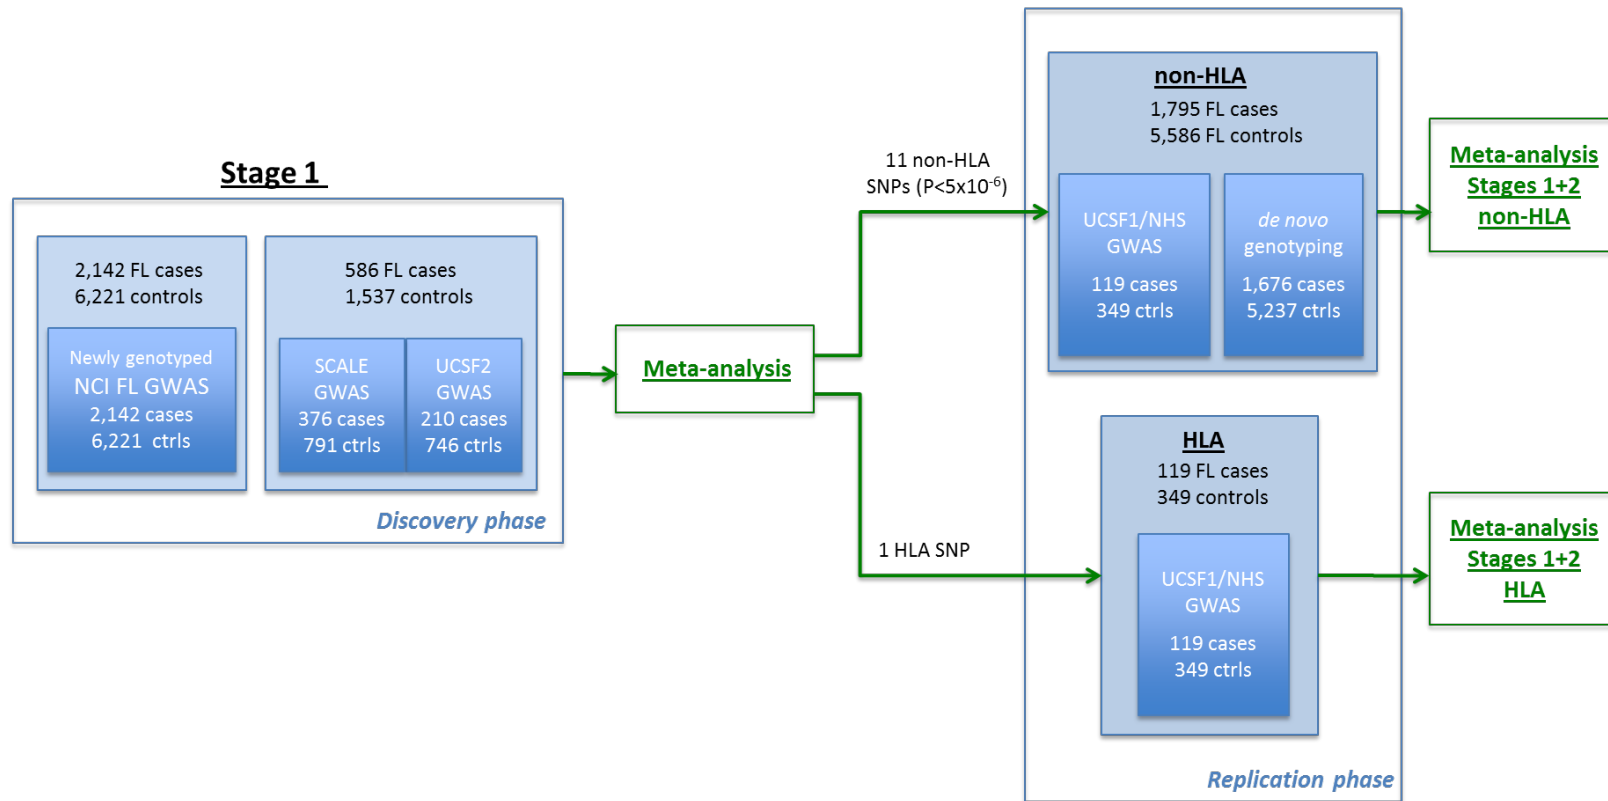

Figure S1. Schematic of the study design.



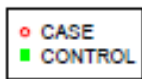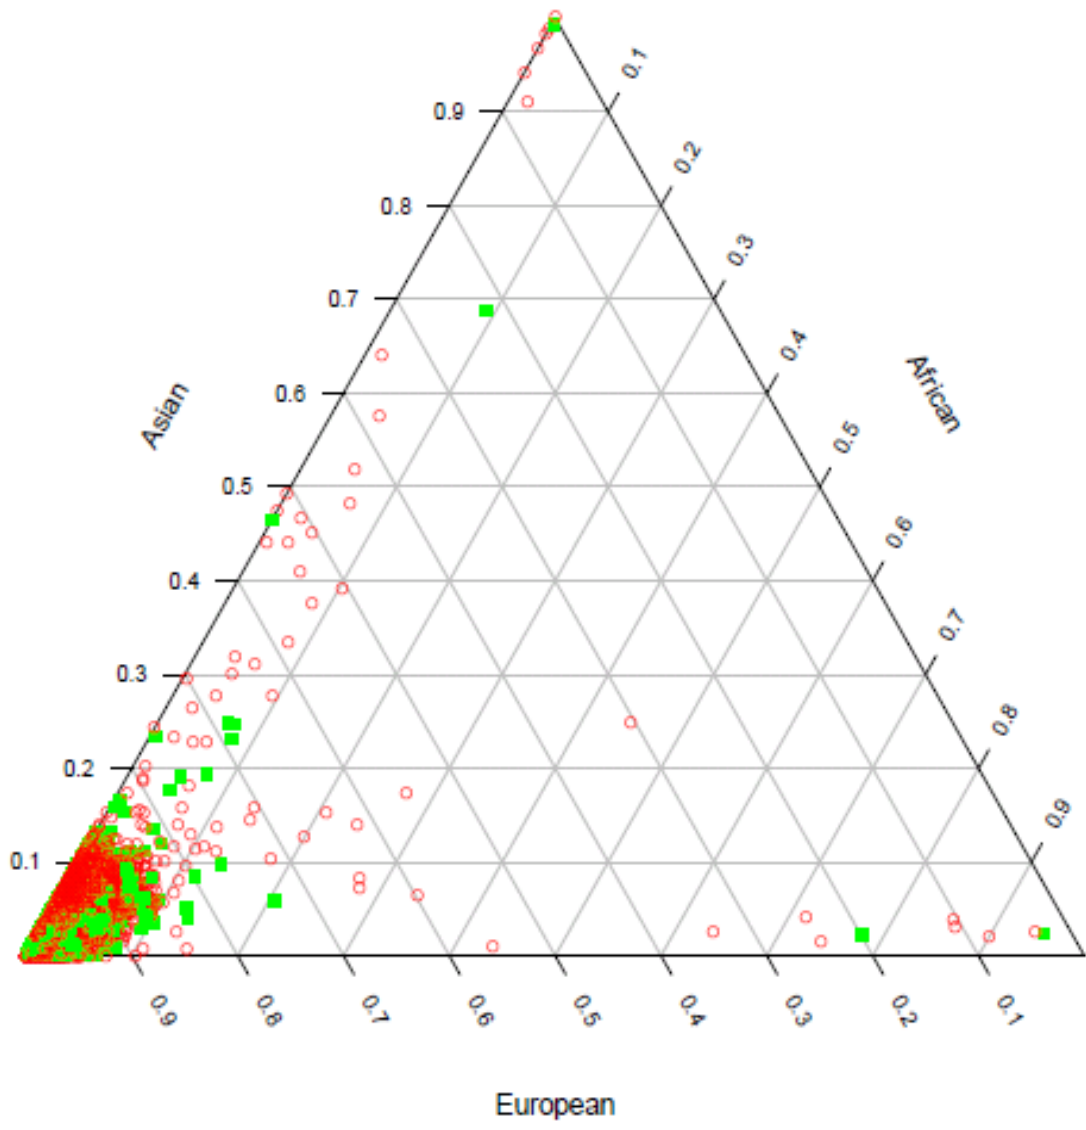

Figure S2. Plot of estimated admixture for individuals genotyped in the NCI FL GWAS. Individuals with <80% European ancestry were excluded.

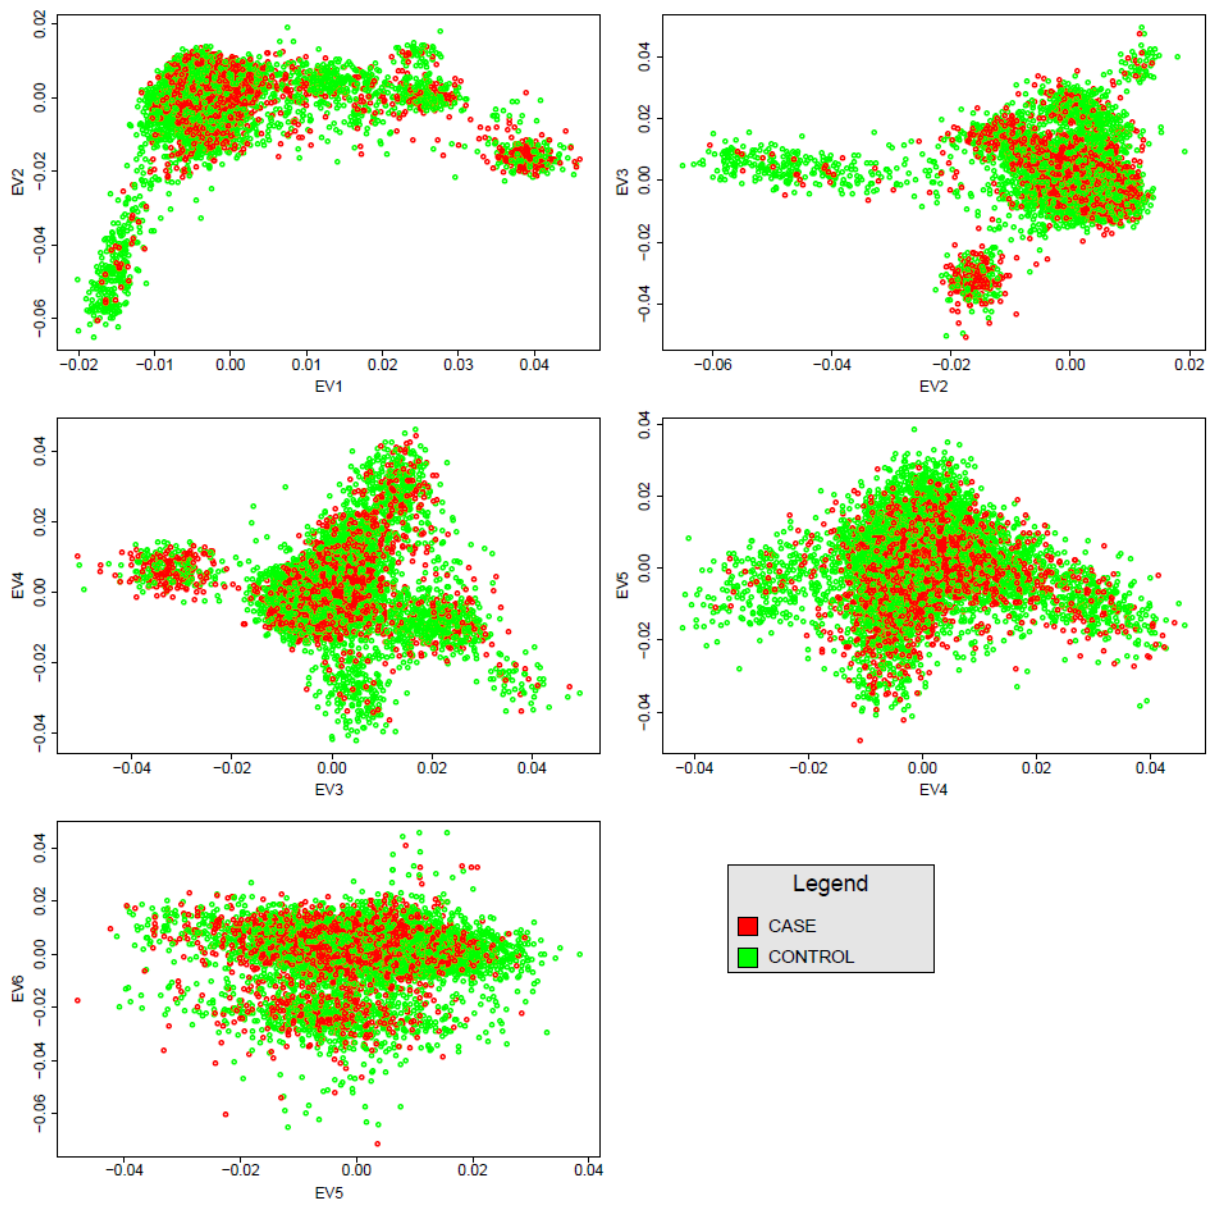

Figure S3: Plot of top eigenvectors from the NCI FL GWAS based on principal components analysis.

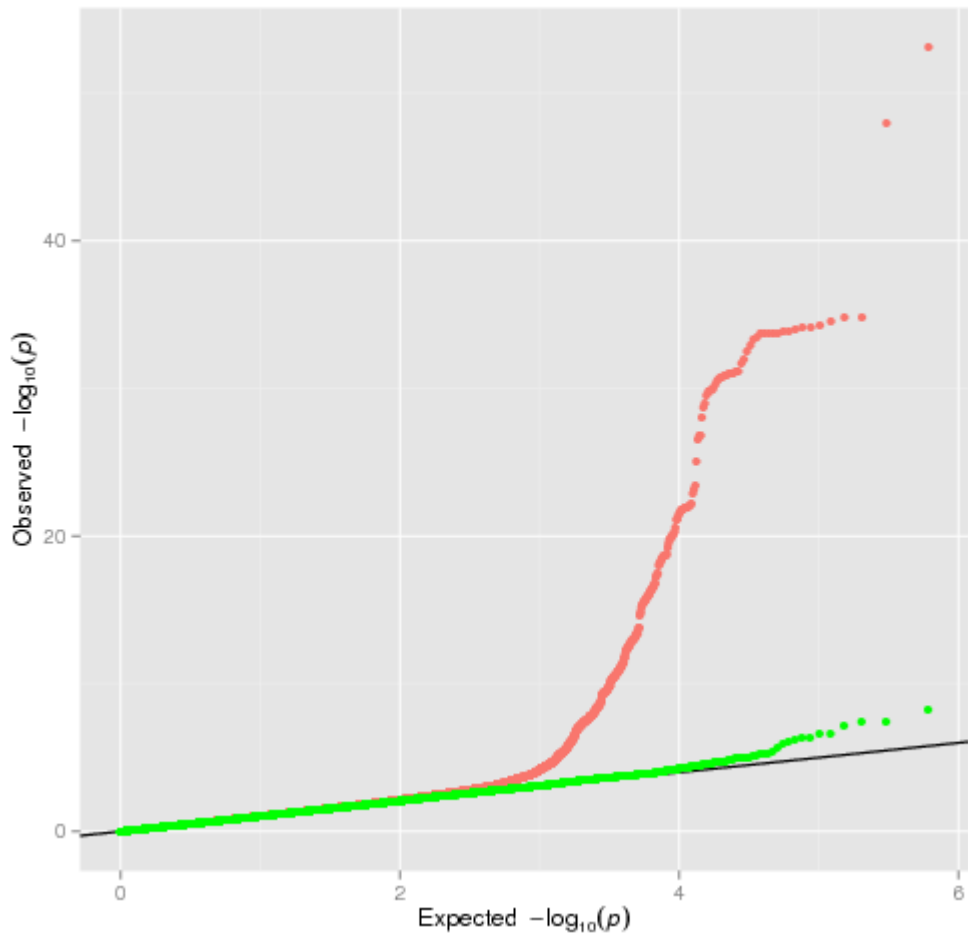

**Figure S4.** Quantile-quantile (Q-Q) plot of the association results for the genotyped SNPs for follicular lymphoma from the NCI FL GWAS before (red) and after removing SNPs located in the HLA region (green).

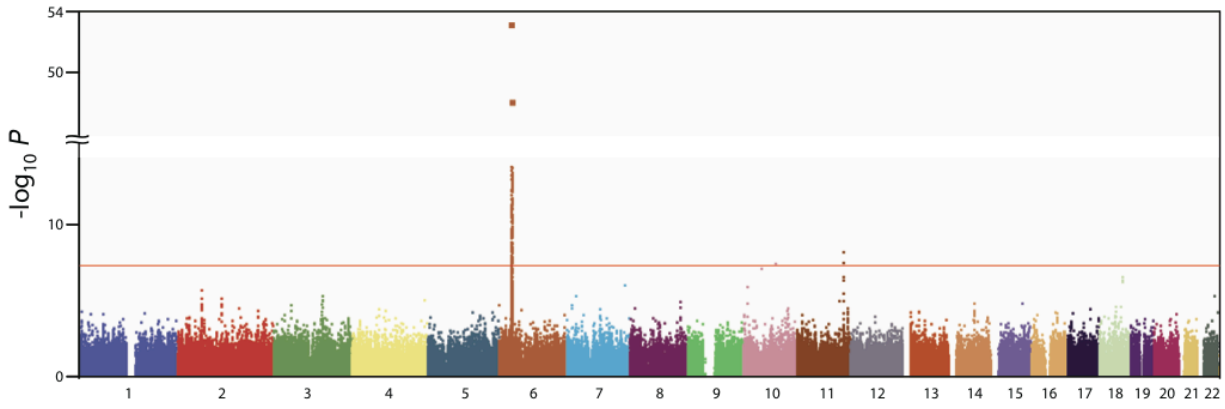

**Figure S5.** Genome-wide  $P$ -values for the association results from the NCI FL GWAS plotted against their respective chromosomal positions. Shown are the two-sided  $P$ -values obtained using the Cochran–Armitage trend test from 611,844 autosomal SNPs in 2,142 cases and 6,221 controls. The red horizontal line represents the genome-wide significance threshold level ( $P < 5.0 \times 10^{-8}$ ).



A.

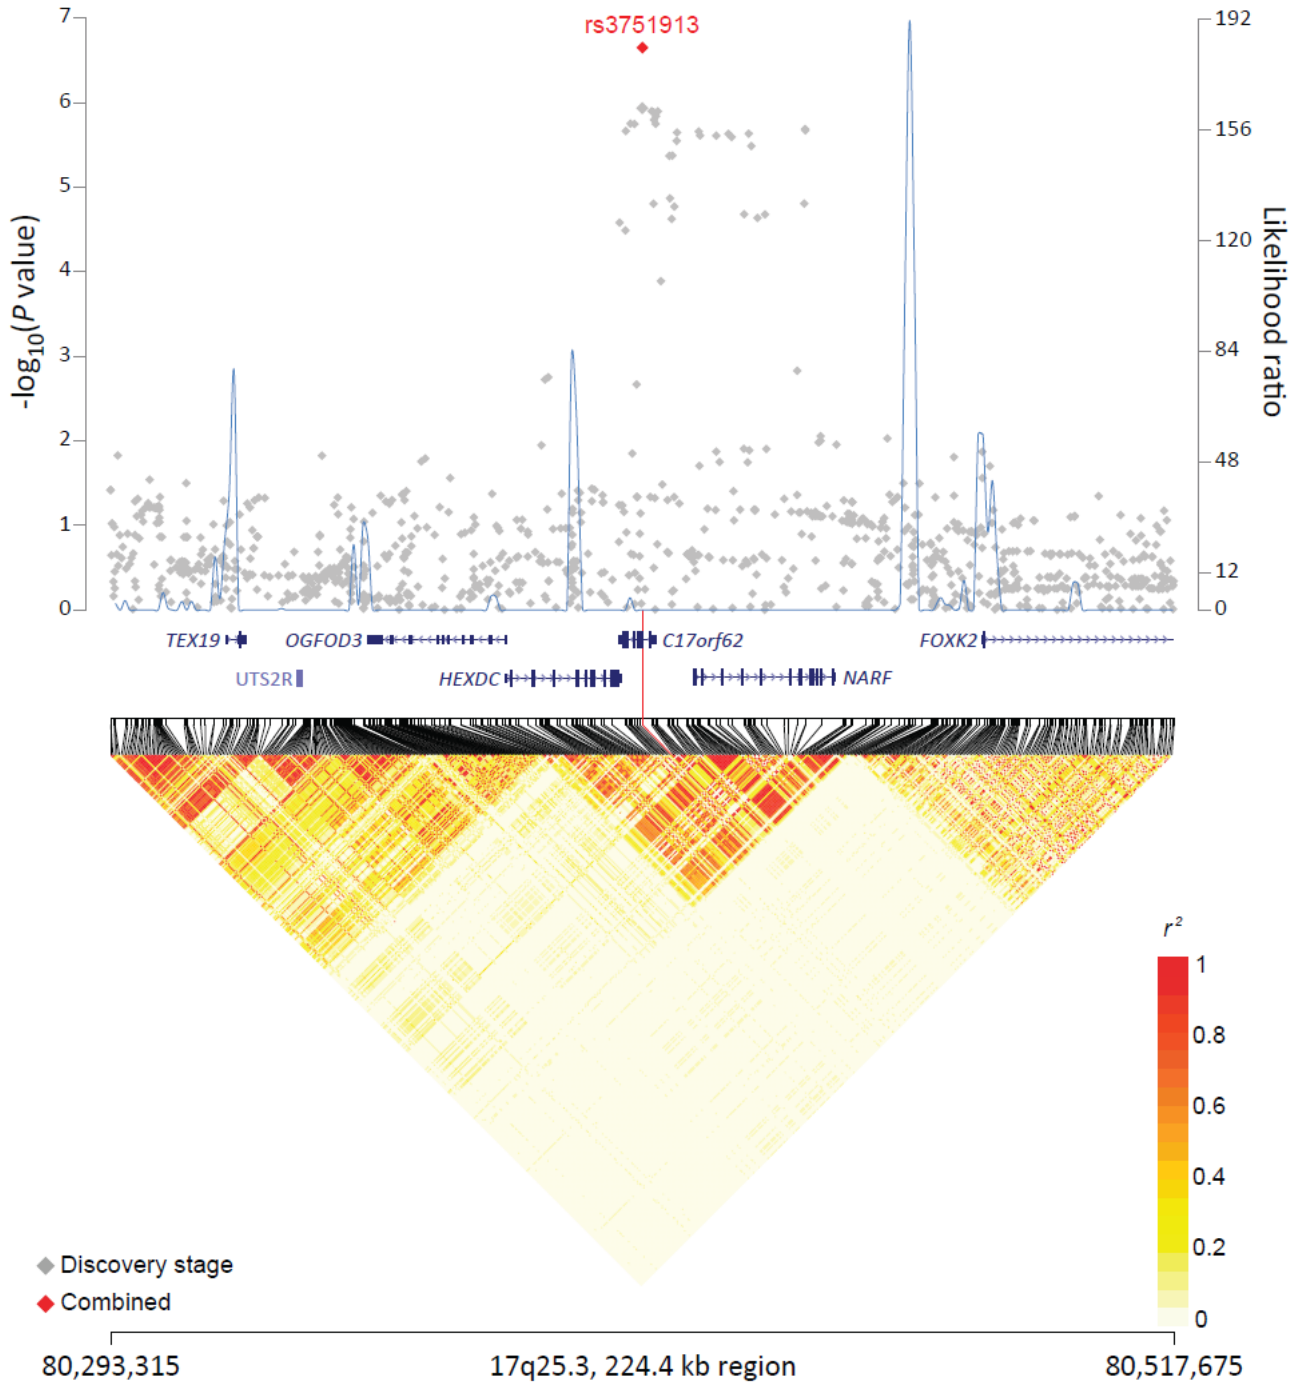

B.

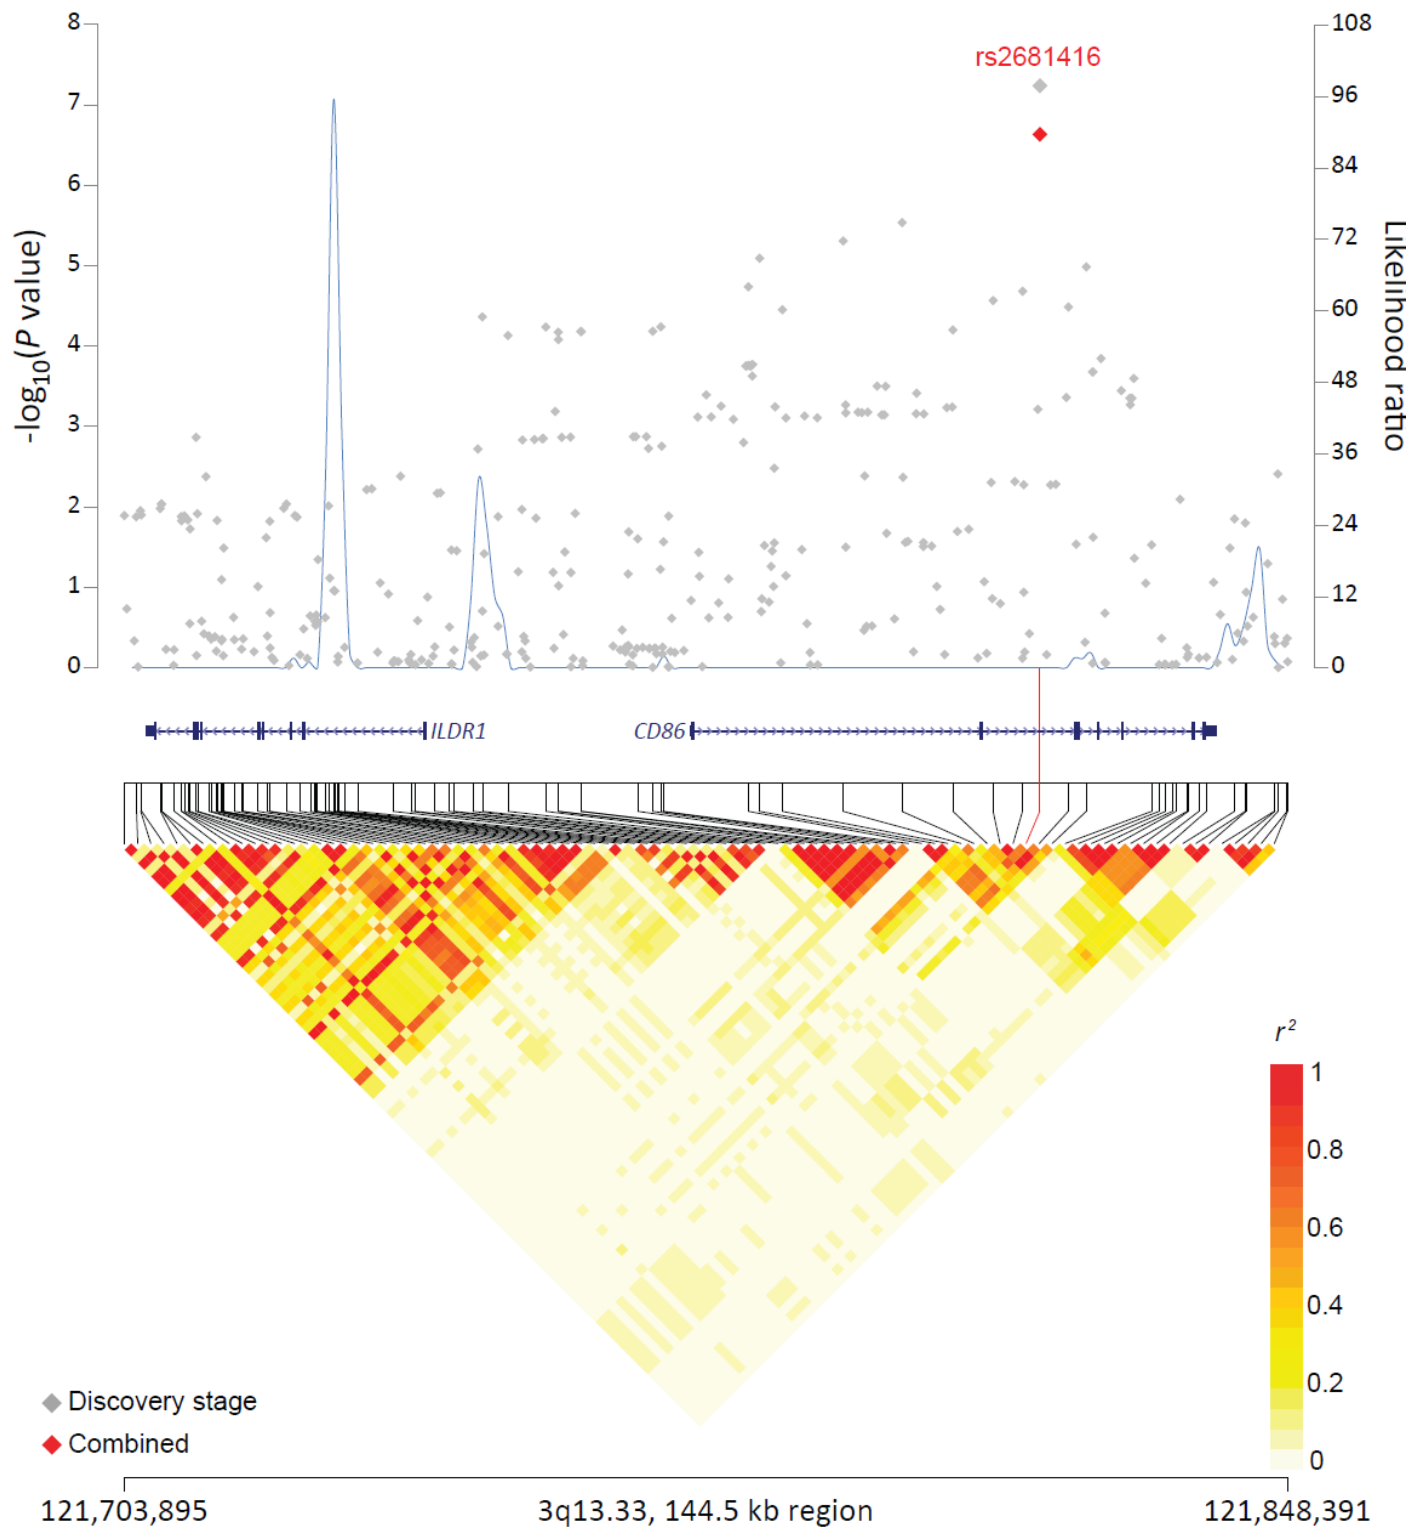

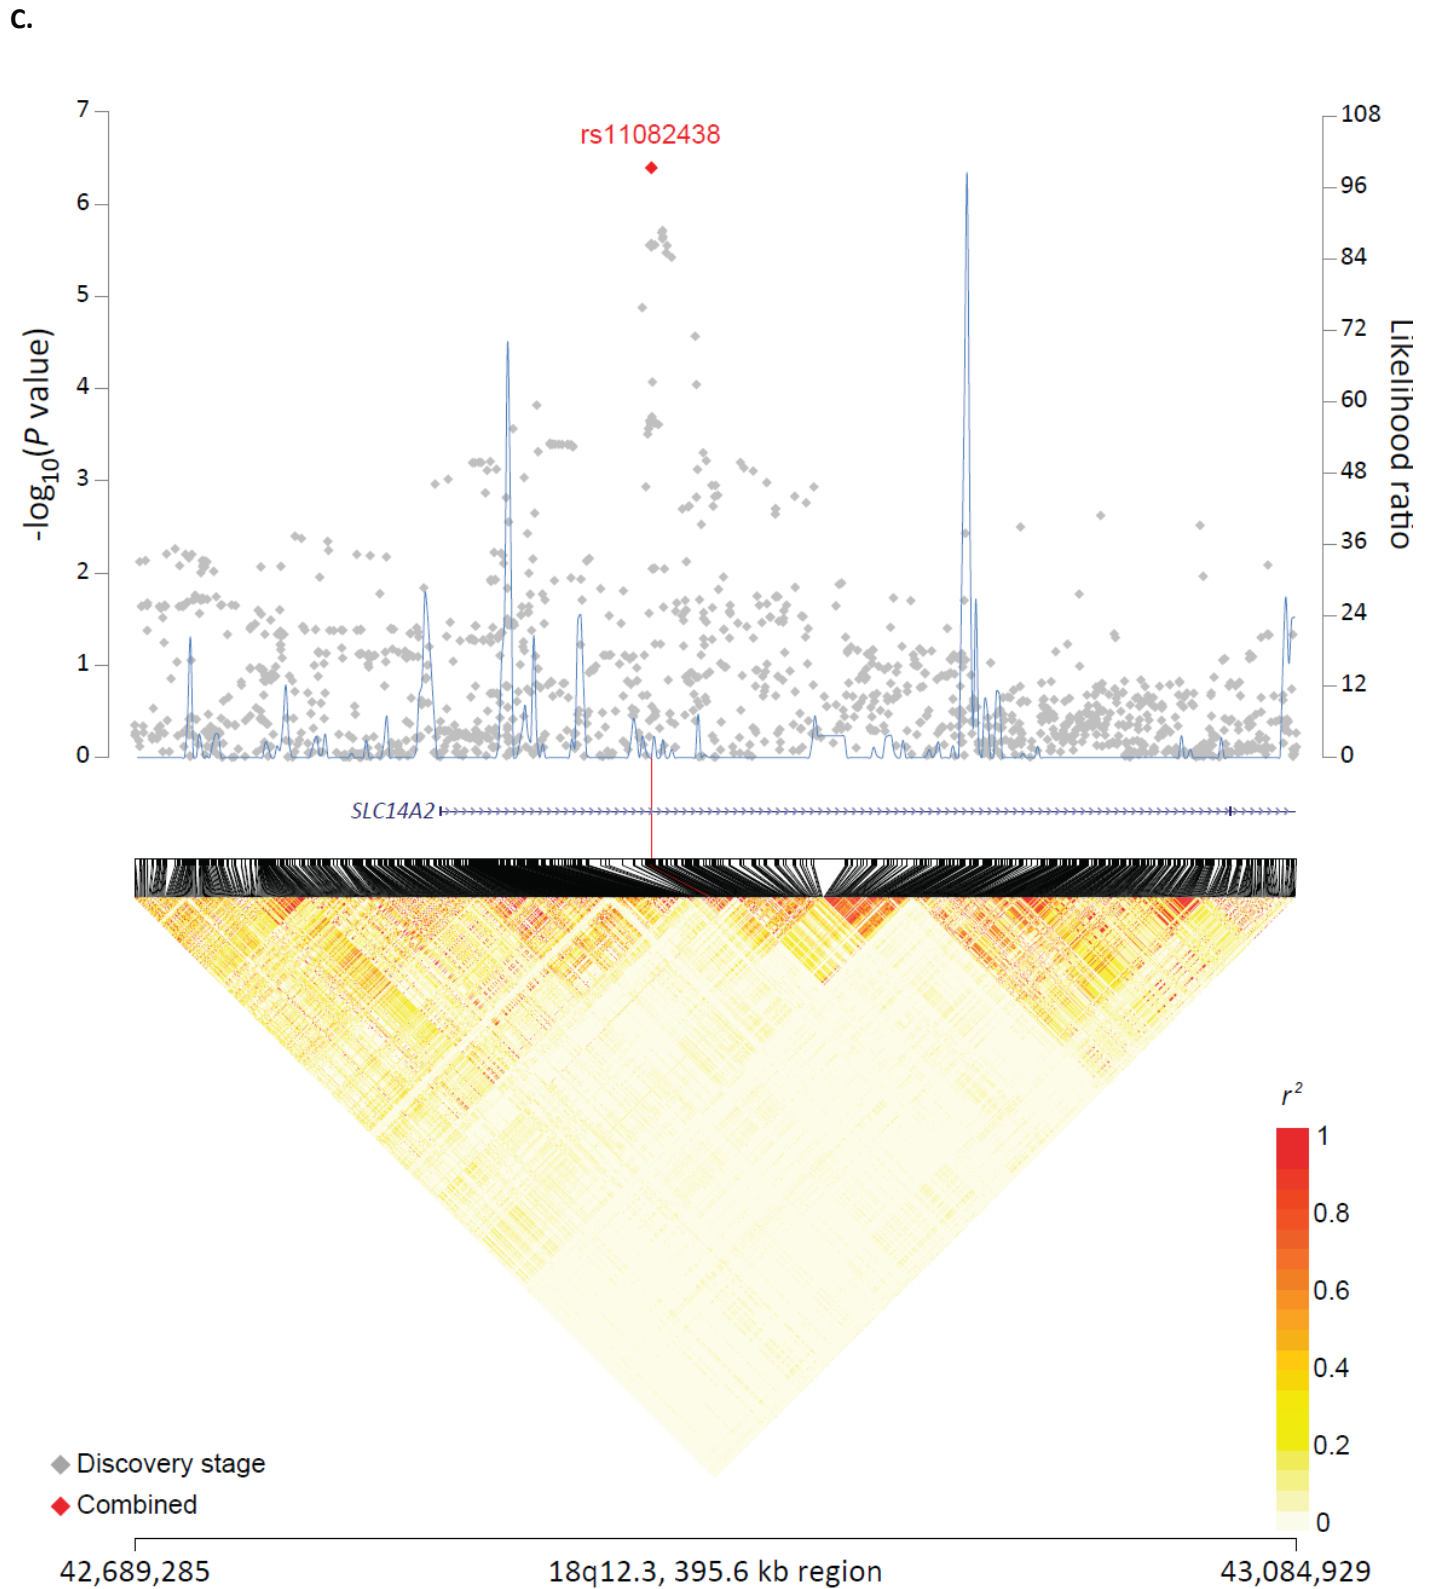

**Figure S6A-C. Regional plots of the non-HLA regions approaching significance with risk of follicular lymphoma. The figure shows the association results from stage 1 (gray dots) and stages 1+2 combined (red diamond), recombination hotspots and LD plots for the associated loci: rs3751913 in 17q25.3 (A), rs2681416 in 3q13.33 (B), and rs11082438 in 18q12.3 (C).**

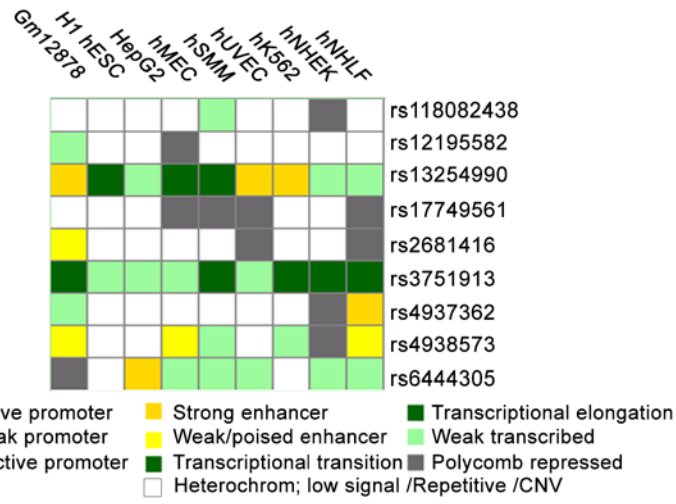

Figure S7. Chromatin states affected by follicular lymphoma associated SNPs.



A.

# HLA region

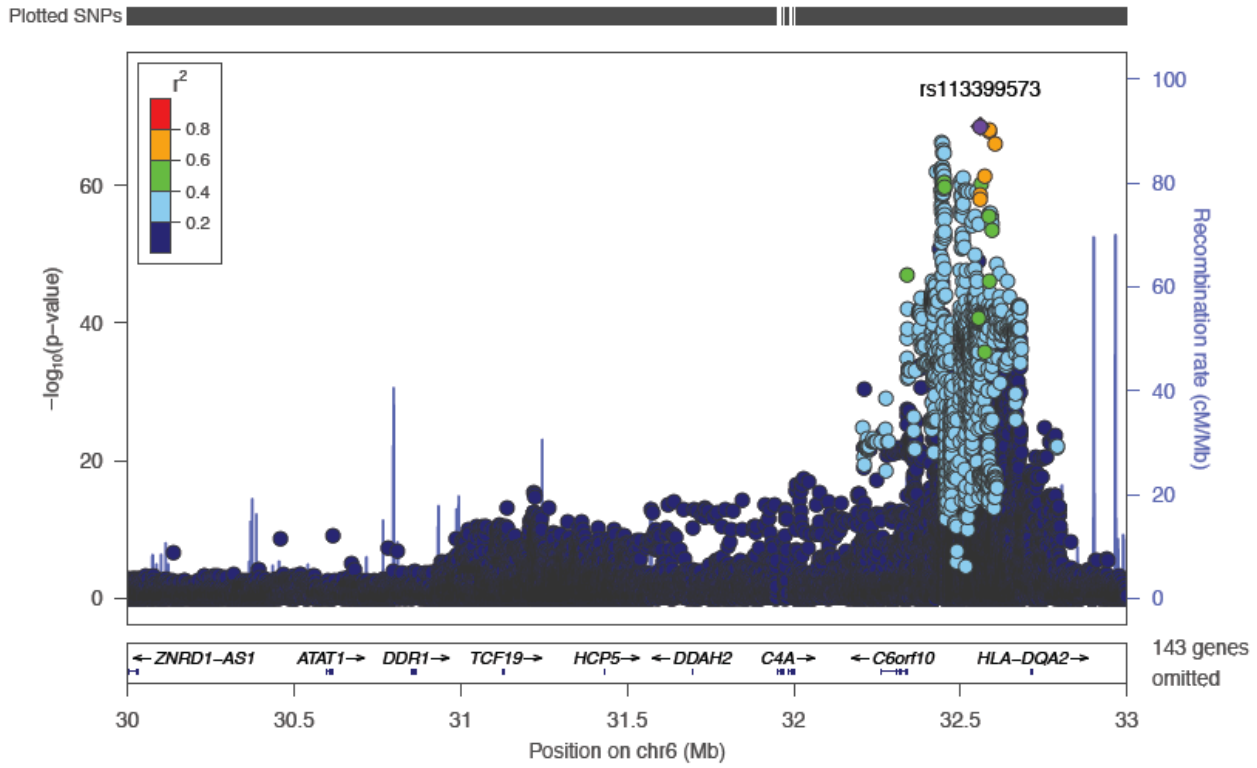

B.

## HLA Class I

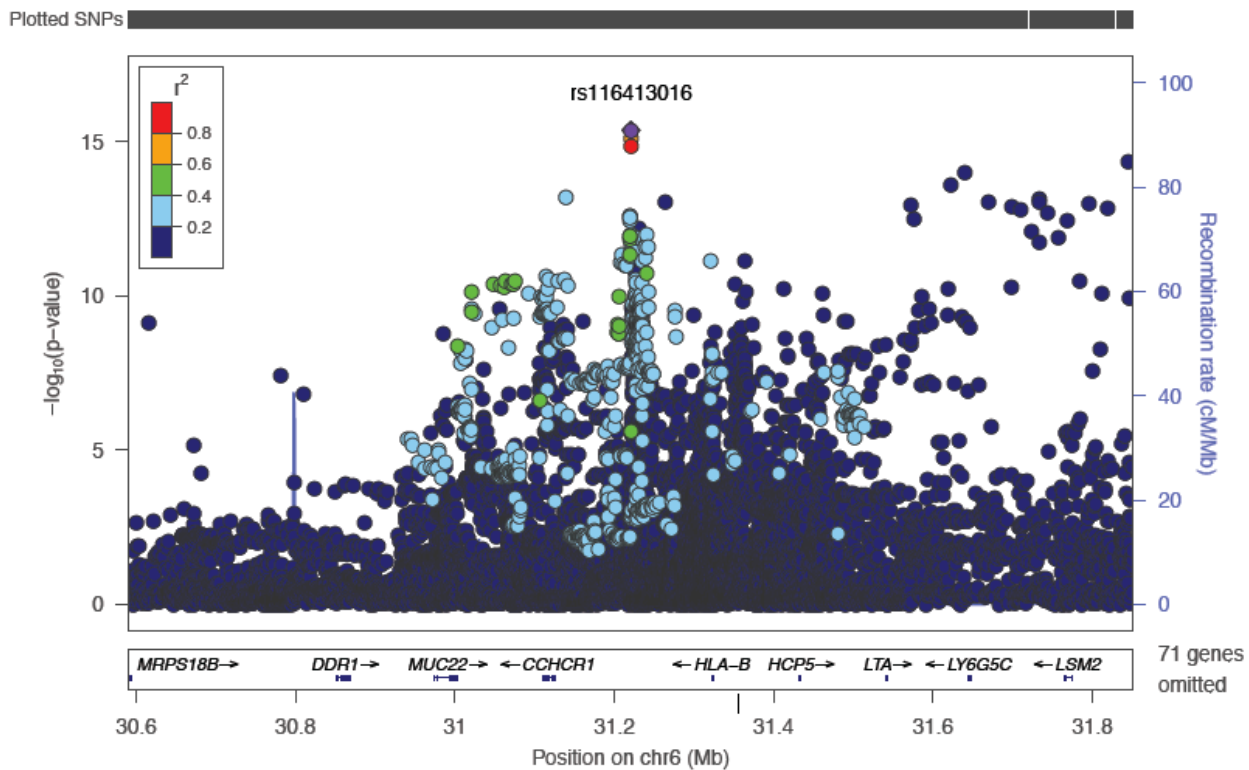

Figure S8A-B. Regional plots of the FL associated loci in the HLA region. Figure shows the association results for the HLA region (30-33Mb) (A), where the main association peak can be observed in the HLA Class II (32-33Mb), as well a zoom-in on the HLA Class I region (B), where a secondary peak can be observed approximately at 31-31.4Mb. SNPs are colored based on LD with the most significantly associated SNP in the region.

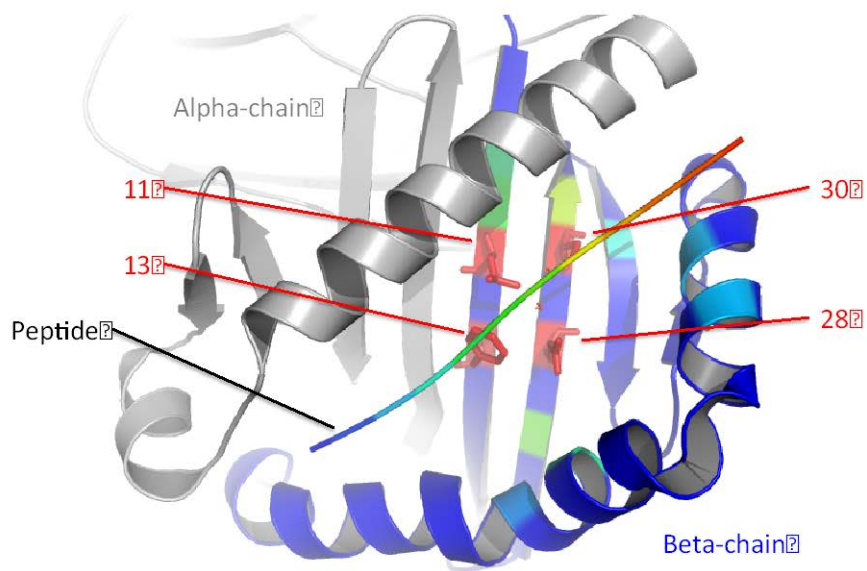

**Figure S9. 3D-structural configuration of HLA-DRβ1 residues around the peptide binding groove. Amino acid residues at DRβ1 positions 11, 13, 28, and 30 are labeled and all have direct contact with the peptide in the binding groove.**

## 2. SUPPLEMENTAL TABLES

| Study Name                                                                                                | Study Abbreviation | No. FL Cases <sup>a</sup> | No. Controls <sup>a</sup> | Design, location                                 | Source of cases                                                                                                                                                                                                                                                                                                                                                                                   | Source of controls                                                                                                                                                    |
|-----------------------------------------------------------------------------------------------------------|--------------------|---------------------------|---------------------------|--------------------------------------------------|---------------------------------------------------------------------------------------------------------------------------------------------------------------------------------------------------------------------------------------------------------------------------------------------------------------------------------------------------------------------------------------------------|-----------------------------------------------------------------------------------------------------------------------------------------------------------------------|
| <b>Stage 1 – NCI FL GWAS</b>                                                                              |                    |                           |                           |                                                  |                                                                                                                                                                                                                                                                                                                                                                                                   |                                                                                                                                                                       |
| <b>Cohort Studies</b>                                                                                     |                    |                           |                           |                                                  |                                                                                                                                                                                                                                                                                                                                                                                                   |                                                                                                                                                                       |
| Alpha-Tocopherol, Beta-Carotene Lung Cancer Prevention Study <sup>1</sup>                                 | ATBC               | 24                        | 240 <sup>b</sup>          | Nested case-control, Finland                     | Identified through linkage to the Finnish Cancer Registry                                                                                                                                                                                                                                                                                                                                         | Cohort participants without a diagnosis of cancer                                                                                                                     |
| American Cancer Society Cancer Prevention Study-II Nutrition Cohort <sup>2</sup>                          | CPS-II             | 161                       | 220 <sup>b</sup>          | Nested case-control, USA                         | Self-report through biannual questionnaires (starting in 1997). Verified by medical records or linkage to state cancer registry.                                                                                                                                                                                                                                                                  | Cohort participants alive at time of case diagnosis without cancer                                                                                                    |
| European Prospective Investigation into Cancer, Chronic Diseases, Nutrition and Lifestyles <sup>3;4</sup> | EPIC               | 53                        | 773                       | Nested case-control, multiple European countries | Cases identified through population cancer registries in seven of the participating countries (Denmark, Italy, The Netherlands, Norway, Spain, Sweden and the UK) and through a combination of methods including health insurance records, cancer and pathology registries, and by active follow-up through study subjects and their next-of-kin in three countries (France, Germany and Greece). | Cohort participants matched by age, sex and study center who were alive and cancer-free at the time of diagnosis of the corresponding case                            |
| Health Professionals Follow-up Study <sup>5</sup>                                                         | HPFS               | 5                         | 86                        | Nested case-control, USA                         | Self-report through bi-annual questionnaires. Verified by medical records and pathology report                                                                                                                                                                                                                                                                                                    | Cohort participants alive at time of case diagnosis without cancer, matched on date of birth, ethnicity, date and time of day of blood collection, and fasting status |



| Study Name                                                                      | Study Abbreviation | No. FL Cases <sup>a</sup> | No. Controls <sup>a</sup> | Design, location               | Source of cases                                                                                                                                                | Source of controls                                                                                                                                                    |
|---------------------------------------------------------------------------------|--------------------|---------------------------|---------------------------|--------------------------------|----------------------------------------------------------------------------------------------------------------------------------------------------------------|-----------------------------------------------------------------------------------------------------------------------------------------------------------------------|
| The Melbourne Collaborative Cohort Study <sup>6</sup>                           | MCCS               | 59                        | 246                       | Nested case-control, Australia | Incident cases ascertained through national cancer registries                                                                                                  | Controls were unaffected cohort participants                                                                                                                          |
| Nurses' Health Study <sup>7;8</sup>                                             | NHS                | 25                        | 90                        | Nested case-control, USA       | Self-report through bi-annual questionnaires. Verified by medical records and pathology report                                                                 | Cohort participants alive at time of case diagnosis without cancer, matched on date of birth, ethnicity, date and time of day of blood collection, and fasting status |
| New York University Women's Health Study <sup>9;10</sup>                        | NYU-WHS            | 13                        | 56                        | Nested case-control, USA       | Self-report through questionnaires every 2-4 years, confirmed by medical and pathology records; and linkages to tumor registries of NY, NJ and Florida and NDI | Cohort participants selected by incidence density sampling (alive and free of cancer at time of case diagnosis)                                                       |
| Prostate, Lung, Colorectal, and Ovarian Cancer Screening Trial <sup>11;12</sup> | PLCO               | 120                       | 3076 <sup>b</sup>         | Nested case-control, USA       | Self-report through annual questionnaires. Verified by medical records and pathology report                                                                    | Cohort participants alive at time of case diagnosis without cancer diagnosis                                                                                          |

| Study Name                                                                                             | Study Abbreviation | No. FL Cases <sup>a</sup> | No. Controls <sup>a</sup> | Design, location                            | Source of cases                                                                                                                                                                                                             | Source of controls                                                                                                       |
|--------------------------------------------------------------------------------------------------------|--------------------|---------------------------|---------------------------|---------------------------------------------|-----------------------------------------------------------------------------------------------------------------------------------------------------------------------------------------------------------------------------|--------------------------------------------------------------------------------------------------------------------------|
| Women's Health Initiative <sup>13</sup>                                                                | WHI                | 176                       | 395                       | Nested case-control, USA                    | Self-report through semi-annual clinic visits or annual contact. Verified through medical records                                                                                                                           | Cohort participants without a diagnosis of cancer                                                                        |
| <b>Population-based case-control studies</b>                                                           |                    |                           |                           |                                             |                                                                                                                                                                                                                             |                                                                                                                          |
| British Columbia Non-Hodgkin Lymphoma Study <sup>14</sup>                                              | BCCA               | 106                       | 390                       | Population-based case-control study, Canada | First primary NHL diagnosis from Vancouver and Victoria metropolitan areas identified through the BC Cancer Registry (excluding HIV-infected and post-transplant cases)                                                     | Controls from the same areas, matched on area, age, and sex ascertained from the British Columbia Health Insurance files |
| Epidemiology & Genetics Unit Lymphoma Case-Control study <sup>15-17</sup>                              | ELCCS              | 188                       | 461                       | Population-based case-control study, UK     | Cases were patients aged between 18-69 residing in predefined geographic areas and newly diagnosed with NHL between 1998 and 2003. Diagnoses were pathologically confirmed and coded to the WHO Classification for Oncology | For each case, one age- and sex-matched control was randomly selected from population based General practice registers   |
| Multicenter Italian study on gene-environment interactions in lymphoma etiology: translational aspects | Italian GxE        | 11                        | 54                        | Population-based case-control study, Italy  | First primary NHL diagnosis identified in the Hematology Departments of the participating centres                                                                                                                           | Cohort participants alive at time of case diagnosis without cancer                                                       |

| Study Name                                                                                                                                            | Study Abbreviation | No. FL Cases <sup>a</sup> | No. Controls <sup>a</sup> | Design, location                                                                                             | Source of cases                                                                                                                                                          | Source of controls                                                                                                                                                                                                                                               |
|-------------------------------------------------------------------------------------------------------------------------------------------------------|--------------------|---------------------------|---------------------------|--------------------------------------------------------------------------------------------------------------|--------------------------------------------------------------------------------------------------------------------------------------------------------------------------|------------------------------------------------------------------------------------------------------------------------------------------------------------------------------------------------------------------------------------------------------------------|
| National Cancer Institute-Surveillance, Epidemiology, and End Results Interdisciplinary Case-Control Study of Non-Hodgkin's Lymphoma <sup>18;19</sup> | NCI-SEER           | 235                       | 689                       | Population-based case-control study, USA                                                                     | First primary NHL diagnosis identified through 4 SEER registries (excluding HIV-infected cases)                                                                          | Controls from the same areas, matched on area, age, and race ascertained through random digit dialing (<64 years of age) and CMMS files (≥65 years of age)                                                                                                       |
| NSW non-Hodgkin lymphoma study <sup>20</sup>                                                                                                          | NSW                | 158                       | 397                       | Population-based case-control study, New South Wales (NSW) and Australian Capital Territory (ACT), Australia | Incident NHL diagnosis identified through NSW or ACT cancer registry (excluding HIV-infected cases and transplant recipients)                                            | Controls randomly selected from electoral rolls, matched on age, sex and State of residence at diagnosis                                                                                                                                                         |
| Scandinavian Lymphoma Etiology Study <sup>21</sup>                                                                                                    | SCALE              | 0                         | 301                       | Population-based case-control study, Scandinavia                                                             | Patients with incident primary NHL diagnosed through rapid case-ascertainment network in Sweden and Denmark                                                              | Frequency matched (age in 10 year intervals, sex and country) population controls prospectively identified every 6 months in nationwide population registers (incidence density sampling).                                                                       |
| Molecular Epidemiology of non-Hodgkin lymphoma <sup>22</sup>                                                                                          | UCSF               | 7                         | 10                        | Population-based case-control study, USA                                                                     | RCA/SEER Incident NHL diagnosis for patients diagnosed in hospitals in 6 San Francisco Bay Area Counties and who were residents of the Bay Area at the time of diagnosis | Controls ascertained through RDD were frequency matched to cases on age in 5-year groups, sex and county of residence; Random sampling of CMS lists for person residing in the same 6 Bay Area counties were used to supplement recruitment of controls aged 65+ |

| Study Name                                                                    | Study Abbreviation | No. FL Cases <sup>a</sup> | No. Controls <sup>a</sup> | Design, location                                                            | Source of cases                                                                                                                                                                            | Source of controls                                                                                                                                                                                                                                                                                                                           |
|-------------------------------------------------------------------------------|--------------------|---------------------------|---------------------------|-----------------------------------------------------------------------------|--------------------------------------------------------------------------------------------------------------------------------------------------------------------------------------------|----------------------------------------------------------------------------------------------------------------------------------------------------------------------------------------------------------------------------------------------------------------------------------------------------------------------------------------------|
| Population-based case-control study in Connecticut women <sup>23</sup>        | Yale               | 104                       | 504                       | Population-based case-control study, USA                                    | First primary NHL diagnosis identified through the Rapid Case Shared Resources from all the hospitals in Connecticut                                                                       | Population-based controls through random digit dialing for cases <65 years and Medicare files for ≥65 years                                                                                                                                                                                                                                  |
| <b>Clinic or hospital-based or mixed case-control studies</b>                 |                    |                           |                           |                                                                             |                                                                                                                                                                                            |                                                                                                                                                                                                                                                                                                                                              |
| Environmental and genetic risks factors study in adult lymphoma <sup>24</sup> | ENGELA             | 34                        | 278                       | Hospital-based case-control study, France                                   | Recent diagnosis of a NHL as per the WHO classification (ICD-O-3) / Cases with AIDS or on immunosuppressant drugs were not eligible. Path reports for 100%, slides review for selected NHL | Hospitalized in the same hospitals as the cases, for any reason except cancer, an accident or a disease directly related to the subject's occupation, smoking, or alcohol consumption. HIV negative.                                                                                                                                         |
| EpiLymph case-control study in six European countries <sup>25</sup>           | EpiLymph           | 136                       | 1172                      | Multicenter case-control study, hospital-based and population-based, Europe | First primary lymphoma diagnosis (according to the 2001 WHO classification of lymphoma                                                                                                     | Controls from Germany and Italy were randomly selected by sampling from the general population, matched to cases on gender, 5-year age-group, and residence area. The rest of the centers used matched hospital controls, with eligibility criteria limited to diagnoses other than cancer, infectious diseases and immunodeficient diseases |
| Iowa-Mayo SPORE Molecular Epidemiology Resource <sup>26</sup>                 | Iowa-Mayo SPORE    | 233                       | 0                         | Clinic-based case registry, USA                                             | Consecutive patients with newly diagnosed, histologically-confirmed non-Hodgkin lymphoma (excluding HIV-infected cases) who were residents of US                                           | N/A                                                                                                                                                                                                                                                                                                                                          |

| Study Name                                                                 | Study Abbreviation | No. FL Cases <sup>a</sup> | No. Controls <sup>a</sup> | Design, location                                 | Source of cases                                                                                                                                                            | Source of controls                                                                                                                                                                         |
|----------------------------------------------------------------------------|--------------------|---------------------------|---------------------------|--------------------------------------------------|----------------------------------------------------------------------------------------------------------------------------------------------------------------------------|--------------------------------------------------------------------------------------------------------------------------------------------------------------------------------------------|
| Mayo Clinic Case-Control Study of NHL <sup>27</sup>                        | Mayo Case-Control  | 261                       | 911                       | Clinic-based case-control study, USA             | Consecutive patients with newly diagnosed, histologically-confirmed non-Hodgkin lymphoma (excluding HIV-infected cases) who were residents of Minnesota, Iowa or Wisconsin | Controls were selected from patients seen in the general medicine clinics at Mayo with a pre-scheduled general medical examination, frequency on age, sex, and geographic region           |
| Memorial-Sloan Kettering Lymphoproliferative disorders Study <sup>28</sup> | MSKCC              | 206                       | 9                         | Hospital-based case-study and NYCP controls, USA | Hospital clinic based ascertainment in a tertiary referral center                                                                                                          | NYCP controls from same geographic area                                                                                                                                                    |
| <b>Stage 1 - Previous GWAS</b>                                             |                    |                           |                           |                                                  |                                                                                                                                                                            |                                                                                                                                                                                            |
| Scandinavian Lymphoma Etiology Study <sup>21</sup>                         | SCALE              | 580                       | 800                       | Population-based case-control study, Scandinavia | Patients with incident primary NHL diagnosed through rapid case-ascertainment network in Sweden and Denmark                                                                | Frequency matched (age in 10 year intervals, sex and country) population controls prospectively identified every 6 months in nationwide population registers (incidence density sampling). |



| Study Name                                                                 | Study Abbreviation | No. FL Cases <sup>a</sup> | No. Controls <sup>a</sup> | Design, location                                                       | Source of cases                                                                                                                                                                                                                                                                                                                                                                               | Source of controls                                                                                                                                                                                                                                               |
|----------------------------------------------------------------------------|--------------------|---------------------------|---------------------------|------------------------------------------------------------------------|-----------------------------------------------------------------------------------------------------------------------------------------------------------------------------------------------------------------------------------------------------------------------------------------------------------------------------------------------------------------------------------------------|------------------------------------------------------------------------------------------------------------------------------------------------------------------------------------------------------------------------------------------------------------------|
| Molecular Epidemiology of non-Hodgkin lymphoma <sup>22</sup>               | UCSF2              | 215                       | 753                       | Population-based case-control study, USA                               | RCA/SEER Incident NHL diagnosis for patients diagnosed in hospitals in 6 San Francisco Bay Area Counties and who were residents of the Bay Area at the time of diagnosis                                                                                                                                                                                                                      | Controls ascertained through RDD were frequency matched to cases on age in 5-year groups, sex and county of residence; Random sampling of CMS lists for person residing in the same 6 Bay Area counties were used to supplement recruitment of controls aged 65+ |
| <b>Stage 2 - Replication studies</b>                                       |                    |                           |                           |                                                                        |                                                                                                                                                                                                                                                                                                                                                                                               |                                                                                                                                                                                                                                                                  |
| Iowa-Mayo SPORE Molecular Epidemiology Resource <sup>26</sup>              | Iowa-Mayo SPORE    | 105                       | 0 <sup>c</sup>            | Clinic-based case registry, USA                                        | Consecutive patients with newly diagnosed, histologically-confirmed non-Hodgkin lymphoma (excluding HIV-infected cases) who were residents of US                                                                                                                                                                                                                                              | N/A                                                                                                                                                                                                                                                              |
| Mayo Clinic Case-Control Study of NHL <sup>27</sup>                        | Mayo Case-Control  | 145                       | 388                       | Clinic-based case-control study, USA                                   | Consecutive patients with newly diagnosed, histologically-confirmed non-Hodgkin lymphoma (excluding HIV-infected cases) who were residents of Minnesota, Iowa or Wisconsin                                                                                                                                                                                                                    | Controls were selected from patients seen in the general medicine clinics at Mayo with a pre-scheduled general medical examination, frequency on age, sex, and geographic region                                                                                 |
| MD Anderson lymphoma case-control study                                    | MD Anderson        | 541                       | 542                       | Case-control, USA                                                      | MD Anderson Cancer Center                                                                                                                                                                                                                                                                                                                                                                     | Kelsey Seybold Clinics                                                                                                                                                                                                                                           |
| Memorial-Sloan Kettering Lymphoproliferative disorders Study <sup>29</sup> | MSKCC              | 403                       | 376                       | Hospital-based case-study and NYCP controls, USA                       | Hospital clinic based ascertainment in a tertiary referral center                                                                                                                                                                                                                                                                                                                             | NYCP controls from same geographic area                                                                                                                                                                                                                          |
| NCI Replication Study <sup>1-28; 30</sup>                                  | NCI Rep            | 605                       | 4296                      | Mixed study of population, trial and hospital-based cases and controls | Follicular cases from the stage 1 studies that did not have sufficient DNA for scanning or failed in scanning due to low completion. Also includes 402 FL cases from a randomized clinical trial of advanced follicular lymphoma evaluating maintenance therapy with rituximab after induction of response with chemotherapy plus rituximab in comparison without maintenance therapy (PRIMA) | Controls from the stage 1 studies that were not scanned or failed scanning due to low completion.                                                                                                                                                                |

| Study Name                                                           | Study Abbreviation | No. FL Cases <sup>a</sup> | No. Controls <sup>a</sup> | Design, location                     | Source of cases                                                                                                                                                          | Source of controls                                                                              |
|----------------------------------------------------------------------|--------------------|---------------------------|---------------------------|--------------------------------------|--------------------------------------------------------------------------------------------------------------------------------------------------------------------------|-------------------------------------------------------------------------------------------------|
| Molecular Epidemiology of non-Hodgkin lymphoma <sup>22; 31; 32</sup> | UCSF1/NHS          | 120                       | 349                       | Case series with population controls | RCA/SEER Incident NHL diagnosis for patients diagnosed in hospitals in 6 San Francisco Bay Area Counties and who were residents of the Bay Area at the time of diagnosis | Participants from the Nurses' Health Study that were selected for a GWAS of endometrial cancer. |

<sup>a</sup>Number of cases and controls with DNA available; however, not all subjects had sufficient DNA for scanning and/or Taqman genotyping. Only a subset of controls with DNA was selected for scanning in stage 1.

<sup>b</sup>Controls scanned previously on the Illumina Omni2.5.

<sup>c</sup>No controls were ascertained for this study. For the replication, the Iowa-Mayo SPORE and the Mayo Case-Control studies were considered to be a single study.

**Table S1. Description and study design of studies included in stages 1 and 2.**

This GWAS of FL was part of a larger initiative that included participants of European descent from 22 NHL studies including 9 prospective cohort studies, and 8 population-based and 5 clinic- or hospital-based case-control studies. All studies obtained informed consent from participants and approval from the respective Institutional Review Boards for this study. Cases were ascertained from cancer registries, clinics or hospitals or through self-report verified by medical and pathology reports. The phenotype information for all NHL cases was reviewed centrally at the International Lymphoma Epidemiology Consortium (InterLymph) Data Coordinating Center and harmonized according to the hierarchical classification proposed by the InterLymph Pathology Working Group based on the World Health Organization (WHO) classification (2008)<sup>33; 34</sup>

| Study                                  | Sample QC                      |                              |                                                                                         |                                     | Genotyping and Imputation |                                   |                |           |        |                           |                     |                       |
|----------------------------------------|--------------------------------|------------------------------|-----------------------------------------------------------------------------------------|-------------------------------------|---------------------------|-----------------------------------|----------------|-----------|--------|---------------------------|---------------------|-----------------------|
|                                        | No. of cases /controls in file | Inclusion/exclusion criteria |                                                                                         | No.cases /controls after exclusions | Platform                  | Inclusion criteria for Imputation |                |           |        | SNPs that met QC criteria | Imputation Software | SNPs in meta-analysis |
| Minimum sample call rate for inclusion |                                | Exclusions                   | Genotype calling algorithm                                                              |                                     |                           | MAF                               | SNP Call rate* | P for HWE |        |                           |                     |                       |
| <b>Stage 1: Discovery</b>              |                                |                              |                                                                                         |                                     |                           |                                   |                |           |        |                           |                     |                       |
| NCI                                    | 2301/6390 <sup>a</sup>         | >=93%                        | 1) Abnormal heterozygosity; 2) gender discordance; 3) unexpected duplicates; 4) Non CEU | 2142/6221                           | Illumina OmniExpress      | BeadStudio (GenCall)              | >= 0.01        | >=0.95    | >=1e-6 | 611844                    | IMPUTE2             | 21554489 <sup>b</sup> |
| SCALE                                  | 379/791                        | >=95%                        | Unexpected duplicates                                                                   | 376/791                             | Illumina HumanHap 317K    | BeadStudio (GenCall)              | >= 0.01        | >=0.95    | >=1e-6 | 298045                    | IMPUTE2             | 14205416              |
| UCSF2                                  | 213/751                        | >=95%                        | 1) Abnormal heterozygosity; 2) PCA outlier                                              | 210/746                             | Illumina HumanCNV370-Duo  | BeadStudio (GenCall)              | >= 0.01        | >=0.95    | >=1e-6 | 290523                    | IMPUTE2             | 15085856              |
| <b>Stage 2: Replication</b>            |                                |                              |                                                                                         |                                     |                           |                                   |                |           |        |                           |                     |                       |
| UCSF1/NHS                              | 120/349                        | >=95%                        | Incomplete phenotype                                                                    | 119/349                             | Illumina OmniExpress      | BeadStudio (GenCall)              | >= 0.01        | >=0.95    | >=1e-6 | 614320                    | IMPUTE2             | 12776022              |

<sup>a</sup>A total of 3536 control subjects from ATBC, CPSII and PLCO cohorts that previously genotyped on Illumina Omni 2.5M chips were pooled into the NCI set.

<sup>b</sup>Use both MAF>0.0001 and INFO>0.3 for post imputation SNP filtering. NCI set resulted in more SNPs being retained for analysis.

**Table S2. Information on genotyping methods, quality control, imputation, and analysis for GWAS.**

| Study                                                         | Genotyped Subjects |             | Exclusions        |            |                |          |                    |          |                       |          |           |           | Previously scanned |             | Final subjects included in the analysis |             |             |
|---------------------------------------------------------------|--------------------|-------------|-------------------|------------|----------------|----------|--------------------|----------|-----------------------|----------|-----------|-----------|--------------------|-------------|-----------------------------------------|-------------|-------------|
|                                                               |                    |             | High missing rate |            | Heterozygosity |          | Gender discordance |          | Unexpected duplicates |          | Non CEU   |           |                    |             |                                         |             |             |
|                                                               | Cases              | Controls    | Cases             | Controls   | Cases          | Controls | Cases              | Controls | Cases                 | Controls | Cases     | Controls  | Cases              | Controls    | Cases                                   | Controls    | Total       |
| <b>Cohort studies</b>                                         |                    |             |                   |            |                |          |                    |          |                       |          |           |           |                    |             |                                         |             |             |
| ATBC                                                          | 20                 |             | 3                 |            |                |          |                    |          |                       |          |           |           |                    | 240         | 17                                      | 240         | 257         |
| CPS-II                                                        | 161                |             | 16                |            |                |          | 1                  |          | 2                     |          | 1         |           |                    | 220         | 141                                     | 220         | 361         |
| EPIC                                                          | 47                 | 275         | 1                 | 9          |                |          |                    | 1        |                       |          |           |           |                    |             | 46                                      | 265         | 311         |
| HPFS                                                          | 5                  | 86          |                   | 0          |                |          |                    |          |                       |          |           | 1         |                    |             | 5                                       | 85          | 90          |
| MCCS                                                          | 59                 | 76          | 1                 | 1          |                |          |                    |          |                       |          |           |           |                    |             | 58                                      | 75          | 133         |
| NHS                                                           | 25                 | 90          | 1                 | 2          |                |          |                    |          |                       |          |           |           |                    |             | 24                                      | 88          | 112         |
| NYU-WHS                                                       | 13                 | 56          | 1                 | 3          |                |          |                    |          | 1                     |          |           |           |                    |             | 11                                      | 53          | 64          |
| PLCO                                                          | 120                |             | 4                 |            |                |          |                    |          | 1                     |          |           |           |                    | 3076        | 115                                     | 3076        | 3191        |
| WHI                                                           | 176                | 250         | 13                | 19         |                |          |                    |          | 1                     |          | 1         | 3         |                    |             | 161                                     | 228         | 389         |
| <b>Subtotal</b>                                               | <b>626</b>         | <b>833</b>  | <b>40</b>         | <b>34</b>  |                |          | <b>1</b>           | <b>1</b> | <b>5</b>              |          | <b>2</b>  | <b>4</b>  |                    | <b>3536</b> | <b>578</b>                              | <b>4330</b> | <b>4908</b> |
| <b>Population-based case-control studies</b>                  |                    |             |                   |            |                |          |                    |          |                       |          |           |           |                    |             |                                         |             |             |
| BCCA                                                          | 106                | 110         | 7                 | 1          |                |          | 1                  |          |                       |          |           |           |                    |             | 98                                      | 109         | 207         |
| ELCCS                                                         | 188                | 251         | 6                 | 5          |                |          |                    | 1        |                       |          |           |           |                    |             | 182                                     | 245         | 427         |
| Italian GxE                                                   | 16                 | 54          |                   | 8          |                |          |                    | 1        |                       |          |           |           |                    |             | 16                                      | 45          | 61          |
| NCI-SEER                                                      | 234                | 298         | 14                | 23         | 1              |          | 1                  | 2        |                       |          | 1         | 3         |                    |             | 217                                     | 270         | 487         |
| NSW                                                           | 152                | 157         | 3                 | 2          |                |          | 2                  | 1        |                       |          | 1         |           |                    |             | 146                                     | 154         | 300         |
| SCALE                                                         |                    | 299         |                   | 6          |                |          |                    |          |                       |          |           | 2         |                    |             |                                         | 291         | 291         |
| UCSF                                                          | 7                  | 10          |                   | 0          |                |          |                    |          |                       |          |           |           |                    |             | 7                                       | 10          | 17          |
| YALE                                                          | 102                | 149         | 4                 | 3          |                |          |                    |          |                       |          |           |           |                    |             | 98                                      | 146         | 244         |
| <b>Subtotal</b>                                               | <b>805</b>         | <b>1328</b> | <b>34</b>         | <b>48</b>  | <b>1</b>       |          | <b>4</b>           | <b>5</b> |                       |          | <b>2</b>  | <b>5</b>  |                    |             | <b>764</b>                              | <b>1270</b> | <b>2034</b> |
| <b>Clinic or hospital-based or mixed case-control studies</b> |                    |             |                   |            |                |          |                    |          |                       |          |           |           |                    |             |                                         |             |             |
| ENGELA                                                        | 34                 | 77          | 4                 | 14         |                |          |                    |          |                       |          |           |           |                    |             | 30                                      | 63          | 93          |
| EpiLymph                                                      | 136                | 250         | 12                | 35         |                |          |                    |          |                       | 1        | 1         | 3         |                    |             | 123                                     | 211         | 334         |
| Iowa-Mayo<br>SPORE                                            | 233                |             | 2                 | 0          |                |          |                    |          |                       |          |           | 3         |                    |             | 228                                     |             | 228         |
| Mayo Case-<br>Control                                         | 261                | 357         | 12                | 12         |                |          |                    |          | 2                     | 1        | 2         | 1         |                    |             | 245                                     | 343         | 588         |
| MSKCC                                                         | 206                | 9           | 25                | 5          |                |          | 1                  |          |                       |          |           | 6         |                    |             | 174                                     | 4           | 178         |
| <b>Subtotal</b>                                               | <b>870</b>         | <b>693</b>  | <b>55</b>         | <b>66</b>  |                |          | <b>1</b>           |          | <b>2</b>              | <b>2</b> | <b>12</b> | <b>4</b>  |                    |             | <b>800</b>                              | <b>621</b>  | <b>1421</b> |
| <b>Grand total</b>                                            | <b>2301</b>        | <b>2854</b> | <b>129</b>        | <b>148</b> | <b>1</b>       |          | <b>6</b>           | <b>6</b> | <b>7</b>              | <b>2</b> | <b>16</b> | <b>13</b> |                    | <b>3536</b> | <b>2142</b>                             | <b>6221</b> | <b>8363</b> |

**Table S3. Subjects genotyped, quality control exclusions, and final subjects included in the NCI FL GWAS**

| Study                         | No. of subjects |          | % Male  |          | Mean age (SD) |               |
|-------------------------------|-----------------|----------|---------|----------|---------------|---------------|
|                               | Cases           | Controls | Cases   | Controls | Cases         | Controls      |
| <b>STAGE 1: NCI FL GWAS</b>   |                 |          |         |          |               |               |
| ATBC                          | 17              | 240      | 100.00% | 100.00%  | 67.59 (6.00)  | 68.35 (7.67)  |
| BCCA                          | 98              | 109      | 44.90%  | 55.96%   | 58.68 (11.50) | 60.70 (12.66) |
| CPSII                         | 141             | 220      | 58.87%  | 49.55%   | 71.10 (6.75)  | 68.41 (6.28)  |
| EPIC                          | 46              | 265      | 39.13%  | 45.28%   | 60.48 (8.46)  | 62.65 (8.42)  |
| Engela                        | 30              | 63       | 53.33%  | 65.08%   | 51.83 (11.31) | 55.25 (11.34) |
| Epilymph                      | 123             | 211      | 44.72%  | 54.03%   | 57.19 (11.31) | 59.31 (12.96) |
| HPFS                          | 5               | 85       | 100.00% | 100.00%  | 61.80 (6.82)  | 70.56 (8.43)  |
| Iowa-Mayo SPORE               | 228             | 0        | 63.16%  | NA       | 59.79(12.68)  | NA            |
| Italian GxE                   | 16              | 45       | 37.50%  | 62.22%   | 52.44 (12.90) | 55.38 (11.68) |
| Mayo case-control             | 245             | 343      | 52.24%  | 61.22%   | 59.93 (13.37) | 60.90 (13.35) |
| MCCS                          | 58              | 75       | 39.66%  | 52.00%   | 64.72 (10.86) | 70.96 (7.85)  |
| MSKCC                         | 174             | 4        | 54.60%  | 0.00%    | 57.46 (12.19) | 41.25 (9.36)  |
| NCI-SEER                      | 217             | 270      | 47.47%  | 54.07%   | 55.30 (12.07) | 56.57 (11.94) |
| NHS                           | 24              | 88       | 0.00%   | 0.00%    | 63.67 (5.80)  | 64.01 (6.91)  |
| NSW                           | 146             | 154      | 60.96%  | 60.39%   | 54.95 (9.93)  | 57.19 (11.13) |
| NYU-WHS                       | 11              | 53       | 0.00%   | 0.00%    | 64.36 (9.40)  | 76.17 (9.20)  |
| PLCO                          | 115             | 3076     | 55.65%  | 95.68%   | 69.03 (6.73)  | 69.54 (6.19)  |
| SCALE                         | 0               | 291      | 0.00%   | 57.73%   | NA            | 60.01(12.12)  |
| UCSF                          | 7               | 10       | 42.86%  | 60.00%   | 62.14 (10.67) | 43.40 (14.83) |
| ELCCS                         | 182             | 245      | 47.80%  | 50.61%   | 53.61 (7.33)  | 53.19 (8.19)  |
| WHI                           | 161             | 228      | 0.00%   | 0.00%    | 70.53 (6.41)  | 77.66 (6.58)  |
| YALE                          | 98              | 146      | 0.00%   | 0.00%    | 60.30 (12.33) | 61.68 (13.47) |
| Total                         | 2142            | 6221     | 45.75%  | 72.77%   | 60.30 (12.08) | 66.04 (10.44) |
| <b>STAGE 1: PREVIOUS GWAS</b> |                 |          |         |          |               |               |
| SCALE                         | 376             | 791      | 49.47%  | 31.73%   | 57.06 (9.47)  | 50.77 (11.56) |
| UCSF2                         | 210             | 746      | 52.38%  | 57.64%   | 60.83 (11.88) | 61.44 (13.00) |
| <b>STAGE 2: REPLICATION</b>   |                 |          |         |          |               |               |
| UCSF1/NHS                     | 119             | 349      | 51.26%  | 0.00%    | 58.81 (12.87) | 62.52 (8.60)  |
| MD Anderson                   | 541             | 542      | 52.50%  | 52.40%   | 56.70 (10.87) | 59.74 (10.48) |
| MSKCC                         | 375             | 376      | 48.53%  | 18.09%   | 56.08 (12.53) | 57.72 (11.77) |
| MAYO                          | 250             | 385      | 52.80%  | 57.66%   | 60.58 (12.44) | 62.32 (11.85) |
| NCI Replication               | 510             | 3934     | 50.59%  | 44.81%   | 57.82(12.11)  | 60.67(14.52)  |

**Table S4. Characteristics of the cases and controls included in the final analysis for stages 1-2.**



| SNP        | SNP location | SNP location with respect to nearest gene(s)              | Observations                                                                                                                                                                                                                                                                                                                                                                                                                                                                                                                                                                              |
|------------|--------------|-----------------------------------------------------------|-------------------------------------------------------------------------------------------------------------------------------------------------------------------------------------------------------------------------------------------------------------------------------------------------------------------------------------------------------------------------------------------------------------------------------------------------------------------------------------------------------------------------------------------------------------------------------------------|
| rs4938573  | 11q23.3      | 12.6kb upstream of <i>CXCR5</i>                           | <ul style="list-style-type: none"> <li><i>CXCR5</i> augments B-cell migration<sup>35</sup> and activation during B-cell receptor signaling<sup>36</sup></li> <li>A previous study reported a suggestive association between FL risk and a weakly correlated SNP in the <i>CXCR5</i> region, rs1790192 (<math>r^2=0.25</math>)<sup>37</sup>. In our study, mutual adjustment for both loci showed that rs4938573 is independently associated with FL risk (adjusted OR=1.30, <math>P=4.7 \times 10^{-12}</math>).</li> </ul>                                                               |
| rs4937362  | 11q24.3      | 35kb upstream of <i>ETS1</i>                              | <ul style="list-style-type: none"> <li><i>ETS1</i> is a transcription factor and member of the ETS family. It is a negative regulator of Th17 and B-cell differentiation, is expressed in lymphoid cells and regulates the expression of several genes involved in lymphocyte survival and proliferation<sup>38</sup>.</li> </ul>                                                                                                                                                                                                                                                         |
| rs6444305  | 3q28         | Overlapping <i>LPP</i> , 836.4 kb upstream of <i>BCL6</i> | <ul style="list-style-type: none"> <li><i>LPP</i> encodes a LIM domain-containing protein and participates in cell adhesion, cell migration, proliferation and transcription dynamics<sup>39</sup>.</li> <li>rs6444305 is located 650.5kb from rs6773854 (<math>r^2=0.04</math>), a SNP in the <i>BCL6/LPP</i> region previously linked with risk of B-cell lymphoma and diffuse large B-cell lymphoma (DLBCL) in East Asian populations<sup>40</sup>. In the current study, rs6773854 was not strongly associated with FL (OR=1.11, <math>P=0.01</math>).</li> </ul>                     |
| rs17749561 | 18q21.33     | 7.4kb downstream of <i>BCL2</i>                           | <ul style="list-style-type: none"> <li><i>BCL2</i> is an anti-apoptotic oncogene, and a partner gene in the hallmark FL translocation t(14;18)(q32;q21) associated with <i>BCL2</i> over-expression<sup>41</sup>.</li> <li>rs17749561 is located near the major translocation breakpoint within the 3'UTR and it is in high linkage disequilibrium (LD) with rs4987855 (<math>r^2=0.86</math>), a chronic lymphocytic leukemia (CLL) risk allele<sup>42</sup>.</li> </ul>                                                                                                                 |
| rs13254990 | 8q24.21      | Intronic to <i>PVT1</i>                                   | <ul style="list-style-type: none"> <li><i>PVT1</i> is a frequent site of translocations for Burkitt lymphoma, plasmacytomas<sup>43</sup> and aggressive B-cell lymphomas<sup>44</sup>.</li> <li>Whereas rs13254990 is weakly correlated (<math>r^2 \leq 0.2</math>) with other nearby SNPs associated with Hodgkin lymphoma<sup>45</sup>, CLL<sup>46</sup>, and numerous solid cancers<sup>47-51</sup>, it is in high LD with a DLBCL risk locus, rs13255292 (<math>r^2=0.93</math>) (<i>manuscript submitted</i>), suggesting a common susceptibility locus for FL and DLBCL.</li> </ul> |

**Table S5. Characteristics of the non-HLA loci that showed genome-wide significance.**

| chr | pos (hg19) | LD (r <sup>2</sup> ) | LD (D') | variant                     | Ref | Alt | EUR freq | GERP cons | SiPhy cons | Promoter histone marks | Enhancer histone marks | DNAse         | Proteins bound  | eQTL tissues | Motifs changed | GENCODE genes      | dbSNP func annot |  |
|-----|------------|----------------------|---------|-----------------------------|-----|-----|----------|-----------|------------|------------------------|------------------------|---------------|-----------------|--------------|----------------|--------------------|------------------|--|
| 11  | 118725660  | 0.86                 | 0.94    | <a href="#">rs4936441</a>   | C   | G   | 0.83     |           |            |                        |                        |               |                 |              |                | Evi-1, Nanog, PEBP | 19kb 3' of Y_RNA |  |
| 11  | 118726753  | 0.87                 | -0.94   | <a href="#">rs11217066</a>  | T   | G   | 0.17     |           |            |                        |                        |               |                 |              |                | 4 altered motifs   | 20kb 3' of Y_RNA |  |
| 11  | 118726843  | 0.87                 | -0.94   | <a href="#">rs10892299</a>  | C   | T   | 0.17     |           |            |                        |                        |               |                 |              |                |                    | 20kb 3' of Y_RNA |  |
| 11  | 118729456  | 0.89                 | 0.95    | <a href="#">rs10790269</a>  | C   | T   | 0.82     |           |            |                        |                        |               |                 |              |                | Gfi1,HDAC2,Irf     | 23kb 3' of Y_RNA |  |
| 11  | 118734000  | 0.9                  | -0.96   | <a href="#">rs11217074</a>  | T   | C   | 0.17     |           |            |                        |                        |               |                 |              |                | 4 altered motifs   | 20kb 5' of CXCR5 |  |
| 11  | 118738298  | 0.96                 | 0.99    | <a href="#">rs7119044</a>   | G   | C   | 0.83     |           |            |                        |                        |               |                 |              |                | 8 altered motifs   | 16kb 5' of CXCR5 |  |
| 11  | 118739056  | 0.95                 | 0.98    | <a href="#">rs7122669</a>   | A   | G   | 0.82     |           |            |                        |                        |               |                 |              |                |                    | 15kb 5' of CXCR5 |  |
| 11  | 118740104  | 0.93                 | 0.98    | <a href="#">rs201150316</a> | AT  | A   | 0.83     |           |            |                        |                        |               |                 |              |                | 21 altered motifs  | 14kb 5' of CXCR5 |  |
| 11  | 118740418  | 0.96                 | 0.99    | <a href="#">rs7951740</a>   | G   | C   | 0.83     |           |            | HepG2                  | HMEC, NHLF             |               | HAE2F1          |              |                | Ets,Zbtb3          | 14kb 5' of CXCR5 |  |
| 11  | 118740864  | 0.96                 | 0.99    | <a href="#">rs4936443</a>   | C   | T   | 0.82     |           |            | HepG2, K562, GM12878   | 4 cell types           | 4 cell types  | POL2, MAX       |              |                | Zfx                | 14kb 5' of CXCR5 |  |
| 11  | 118740931  | 0.96                 | 0.99    | <a href="#">rs4938572</a>   | C   | T   | 0.82     |           |            | HepG2, K562, GM12878   | 4 cell types           | 60 cell types | POL2, PBX3, MAX |              |                | 4 altered motifs   | 14kb 5' of CXCR5 |  |

|    |           |      |       |                                                 |   |           |      |                            |               |       |                     |                                   |                      |
|----|-----------|------|-------|-------------------------------------------------|---|-----------|------|----------------------------|---------------|-------|---------------------|-----------------------------------|----------------------|
| 11 | 118741157 | 0.97 | 1     | <a href="#">rs7117261</a>                       | T | C         | 0.83 | HepG2,<br>GM12878,<br>HSMM | 4 cell types  | HepG2 | GR, POL2            | EWSR1-FLI1,<br>Ets, NF-<br>kappaB | 13kb 5' of<br>CXCR5  |
| 11 | 118741842 | 1    | 1     | <a href="#">rs4938573</a>                       | C | T         | 0.82 | GM12878,<br>HMEC,<br>NHLF  |               | Th1   |                     | 4 altered<br>motifs               | 13kb 5' of<br>CXCR5  |
| 11 | 118742724 | 0.83 | 0.99  | <a href="#">rs7125333</a>                       | T | C         | 0.8  | GM12878                    |               |       |                     | 6 altered<br>motifs               | 12kb 5' of<br>CXCR5  |
| 11 | 118742800 | 0.98 | -1    | <a href="#">rs74541740</a>                      | G | A         | 0.18 | GM12878                    |               |       |                     | 23 altered<br>motifs              | 12kb 5' of<br>CXCR5  |
| 11 | 118743286 | 0.82 | -0.99 | <a href="#">rs12365699</a>                      | G | A         | 0.15 | GM12878                    | 13 cell types |       | 7 bound<br>proteins | HNF4, NRSF,<br>ZID                | 11kb 5' of<br>CXCR5  |
| 11 | 118743338 | 0.97 | 0.99  | <a href="#">rs4936444</a>                       | T | C         | 0.82 | GM12878                    | 9 cell types  |       | 4 bound<br>proteins |                                   | 11kb 5' of<br>CXCR5  |
| 11 | 118743772 | 0.96 | 0.98  | <a href="#">rs6421571</a>                       | T | C         | 0.82 | GM12878                    | AG04449       |       |                     |                                   | 11kb 5' of<br>CXCR5  |
| 11 | 118744396 | 0.94 | 0.97  | <a href="#">rs7117313</a>                       | C | G         | 0.82 |                            |               |       |                     | NRSF, TATA,<br>Zfx                | 10kb 5' of<br>CXCR5  |
| 11 | 118744701 | 0.83 | 0.95  | <a href="#">rs13825239</a><br><a href="#">3</a> | A | AAA<br>AG | 0.81 |                            |               |       |                     | EWSR1-FLI1,<br>HDAC2, p300        | 9.8kb 5' of<br>CXCR5 |
| 11 | 118745243 | 0.96 | 1     | <a href="#">rs7481797</a>                       | A | G         | 0.83 |                            |               |       |                     | LXR,Nkx2                          | 9.2kb 5' of<br>CXCR5 |
| 11 | 118745278 | 0.96 | 1     | <a href="#">rs7481819</a>                       | C | T         | 0.83 |                            |               |       |                     | 4 altered<br>motifs               | 9.2kb 5' of<br>CXCR5 |
| 11 | 118745884 | 0.95 | 0.99  | <a href="#">rs10790275</a>                      | G | C         | 0.83 |                            |               |       |                     | Znf143                            | 8.6kb 5' of<br>CXCR5 |
| 11 | 128488322 | 0.8  | 0.98  | <a href="#">rs2156698</a>                       | G | A         | 0.56 |                            |               |       |                     |                                   | RP11-<br>264E20.1    |

|    |           |      |      |                            |   |   |      |                  |                                       |                       |                     |                                  |          |
|----|-----------|------|------|----------------------------|---|---|------|------------------|---------------------------------------|-----------------------|---------------------|----------------------------------|----------|
| 11 | 128489380 | 0.99 | 1    | <a href="#">rs4245081</a>  | C | T | 0.61 | GM12878          | iPS                                   |                       | HNF4,<br>RXR::LXR   | RP11-<br>264E20.1                |          |
| 11 | 128489535 | 0.92 | 1    | <a href="#">rs4245082</a>  | C | T | 0.59 | GM12878          |                                       |                       | 7 altered<br>motifs | RP11-<br>264E20.1                |          |
| 11 | 128489818 | 0.99 | 1    | <a href="#">rs4492838</a>  | C | T | 0.6  | GM12878          | 7 cell types                          | NFKB, GATA2           | BDP1,Hsf            | RP11-<br>264E20.1                |          |
| 11 | 128491023 | 0.98 | 0.99 | <a href="#">rs11221396</a> | C | T | 0.61 | GM12878,<br>HSMM | GM19240                               |                       | 4 altered<br>motifs | RP11-<br>264E20.1                |          |
| 11 | 128492401 | 0.99 | 1    | <a href="#">rs10893897</a> | T | C | 0.6  | NHLF,<br>HSMM    | 6 cell types                          |                       | Gfi1,RFX5           | 689bp 5' of<br>RP11-<br>264E20.1 |          |
| 11 | 128492571 | 1    | 1    | <a href="#">rs11221397</a> | G | T | 0.61 | NHLF,<br>HSMM    |                                       |                       | 6 altered<br>motifs | 859bp 5' of<br>RP11-<br>264E20.1 |          |
| 11 | 128492739 | 1    | 1    | <a href="#">rs4937362</a>  | T | C | 0.61 | NHLF             | LNCaP,<br>8988T,<br>Adult_CD4_<br>Th0 |                       | 5 altered<br>motifs | 1kb 5' of<br>RP11-<br>264E20.1   |          |
| 11 | 128494441 | 0.9  | 0.97 | <a href="#">rs7105899</a>  | G | A | 0.61 | GM12878,<br>H1   | 15 cell types                         | NFKB,CEBPB            | 9 altered<br>motifs | 2.7kb 5' of<br>RP11-<br>264E20.1 |          |
| 3  | 188298562 | 0.98 | 0.99 | <a href="#">rs9878956</a>  | C | G | 0.72 |                  | HL-60,NH-A                            |                       | 9 altered<br>motifs | LPP                              | intronic |
| 3  | 188298688 | 0.98 | 0.99 | <a href="#">rs9823790</a>  | T | C | 0.72 |                  | HL-60                                 |                       | Sox                 | LPP                              | intronic |
| 3  | 188298989 | 0.99 | 1    | <a href="#">rs1849913</a>  | G | A | 0.72 | HepG2            |                                       |                       | 4 altered<br>motifs | LPP                              | intronic |
| 3  | 188299423 | 0.99 | 1    | <a href="#">rs1849911</a>  | A | C | 0.72 | HepG2            | RPTEC                                 | HNF4A,<br>HNF4G, P300 | Myc,Pax-<br>5,Pax-8 | LPP                              | intronic |
| 3  | 188299793 | 0.99 | 1    | <a href="#">rs6444303</a>  | A | G | 0.72 | HepG2            | 5 cell types                          |                       |                     | LPP                              | intronic |

|    |           |      |      |                            |   |     |      |  |                          |               |                  |                      |                  |          |
|----|-----------|------|------|----------------------------|---|-----|------|--|--------------------------|---------------|------------------|----------------------|------------------|----------|
| 3  | 188299819 | 0.99 | 1    | <a href="#">rs6444304</a>  | C | A   | 0.72 |  | HepG2                    | 4 cell types  |                  | COMP1                | LPP              | intronic |
| 3  | 188299902 | 1    | 1    | <a href="#">rs6444305</a>  | G | A   | 0.72 |  | HepG2                    |               |                  | PRDM1,TATA           | LPP              | intronic |
| 3  | 188300051 | 0.96 | 1    | <a href="#">rs13063967</a> | C | A,T | 0.71 |  | HepG2                    |               |                  |                      | LPP              | intronic |
| 18 | 60783211  | 1    | 1    | <a href="#">rs17749561</a> | G | A   | 0.11 |  |                          |               |                  | Irf,NF-kappaB        | 7.4kb 3' of BCL2 |          |
| 18 | 60783729  | 1    | 1    | <a href="#">rs17676919</a> | A | G   | 0.11 |  |                          |               |                  | Brachyury,FA C1,Myc  | 6.8kb 3' of BCL2 |          |
| 18 | 60785638  | 1    | 1    | <a href="#">rs17676949</a> | G | A   | 0.11 |  |                          |               |                  |                      | 4.9kb 3' of BCL2 |          |
| 18 | 60788745  | 0.96 | 1    | <a href="#">rs77551289</a> | A | G   | 0.11 |  |                          |               |                  | Foxp1,GATA           | 1.8kb 3' of BCL2 |          |
| 18 | 60793494  | 0.95 | 0.99 | <a href="#">rs4987856</a>  | C | T   | 0.11 |  | CD34+_Mobilized, HIPEpiC |               |                  | Pax-5                | BCL2             | 3'-UTR   |
| 18 | 60793549  | 0.95 | 0.99 | <a href="#">rs4987855</a>  | C | T   | 0.11 |  | CD34+_Mobilized, HIPEpiC |               |                  | 4 altered motifs     | BCL2             | 3'-UTR   |
| 18 | 60795188  | 0.92 | 0.96 | <a href="#">rs4987845</a>  | C | T   | 0.11 |  |                          |               |                  | Pax-5,RXRA           | BCL2             | 3'-UTR   |
| 8  | 129076451 | 1    | 1    | <a href="#">rs13254990</a> | C | T   | 0.36 |  | K562, Huvec, GM12878     | 6 cell types  | USF2, NFKB, CMYC | Pax-5,Pou3f1         | PVT1             | intronic |
| 8  | 129076573 | 0.92 | 0.98 | <a href="#">rs13255292</a> | C | T   | 0.37 |  | K562, Huvec, GM12878     | 14 cell types | 8 bound proteins | Arnt,SP1             | PVT1             | intronic |
| 17 | 80402045  | 0.93 | 0.98 | <a href="#">rs67228117</a> | T | C   | 0.13 |  | HMEC                     |               |                  | ERalpha-a,Esr2,Rad21 | C17orf62         | intronic |
| 17 | 80403059  | 0.99 | 1    | <a href="#">rs60482040</a> | C | G   | 0.12 |  | LNCaP,Ishikawa           |               | ERALPHA_A, POL2  | 4 altered motifs     | C17orf62         | intronic |

|    |          |      |      |                                 |   |          |      |              |                   |                           |                   |                    |                             |          |
|----|----------|------|------|---------------------------------|---|----------|------|--------------|-------------------|---------------------------|-------------------|--------------------|-----------------------------|----------|
| 17 | 80403894 | 0.98 | 0.99 | <a href="#">rs2291394</a>       | G | A        | 0.12 | HSMM         | 10 altered motifs | C17orf62                  | intronic          |                    |                             |          |
| 17 | 80405552 | 1    | 1    | <a href="#">rs3751913</a>       | T | C        | 0.12 |              | 6 altered motifs  | C17orf62                  | intronic          |                    |                             |          |
| 17 | 80407480 | 0.99 | 1    | <a href="#">rs60529510</a>      | C | T        | 0.12 | 4 cell types | 4 cell types      | 11 cell types             | 19 bound proteins | GR                 | C17orf62                    | 5'-UTR   |
| 17 | 80407948 | 0.98 | 0.99 | <a href="#">rs12450191</a>      | C | T        | 0.12 | 9 cell types |                   |                           |                   | 9 altered motifs   | C17orf62                    | intronic |
| 17 | 80407978 | 0.98 | 0.99 | <a href="#">rs12450192</a>      | C | T        | 0.12 | 9 cell types |                   | GM12864,H<br>L-60         |                   | Myc                | C17orf62                    | intronic |
| 17 | 80408348 | 0.98 | 0.99 | <a href="#">rs9911854</a>       | A | G        | 0.12 | 9 cell types |                   | 30 cell types             | 5 bound proteins  | BHLHE40            | C17orf62                    | intronic |
| 17 | 80408419 | 0.98 | 0.99 | <a href="#">rs9912066</a>       | A | C        | 0.12 | 9 cell types |                   | 31 cell types             | 8 bound proteins  | NRSF,Sin3Ak-<br>20 | C17orf62                    | 5'-UTR   |
| 17 | 80408815 | 0.96 | 0.99 | <a href="#">rs9303029</a>       | C | T        | 0.12 | 8 cell types | H1                | 80 cell types             | 15 bound proteins | 11 altered motifs  | 109bp 5' of<br>C17orf62     |          |
| 17 | 80410445 | 0.96 | 0.99 | <a href="#">rs20202010</a><br>0 | G | GAC<br>T | 0.12 |              | K562              | Th1                       |                   | ATF3,HNF6          | 1.7kb 3' of<br>RP13-20L14.6 |          |
| 17 | 80410447 | 0.96 | 0.99 | <a href="#">rs14596373</a><br>5 | C | CTA<br>A | 0.12 |              | K562              | Th1                       |                   | ATF3,HNF6          | 1.7kb 3' of<br>RP13-20L14.6 |          |
| 17 | 80411207 | 0.92 | 0.99 | <a href="#">rs9896620</a>       | C | G        | 0.13 |              | K562              | K562                      | TAL1              | NF-AT,YY1          | 941bp 3' of<br>RP13-20L14.6 |          |
| 17 | 80411883 | 0.93 | 0.98 | <a href="#">rs58441535</a>      | A | G        | 0.13 |              |                   | HCT-<br>116,WERI-<br>Rb-1 |                   |                    | 265bp 3' of<br>RP13-20L14.6 |          |
| 17 | 80412797 | 0.94 | 0.99 | <a href="#">rs79487483</a>      | A | G        | 0.13 |              |                   |                           |                   | E2F,TBX5,Zfx       | RP13-20L14.6                |          |
| 17 | 80412867 | 0.96 | 0.99 | <a href="#">rs72857495</a>      | A | C        | 0.12 |              |                   |                           |                   |                    | RP13-20L14.6                |          |



|    |           |      |      |                                 |    |   |      |                         |                          |         |            |                    |                       |          |          |
|----|-----------|------|------|---------------------------------|----|---|------|-------------------------|--------------------------|---------|------------|--------------------|-----------------------|----------|----------|
| 17 | 80417443  | 0.98 | 0.99 | <a href="#">rs72859113</a>      | G  | C | 0.12 | 8 cell types<br>GM12878 | Huvec                    | K562    |            | NARF               | intronic              |          |          |
| 17 | 80417729  | 0.98 | 0.99 | <a href="#">rs78720068</a>      | C  | G | 0.12 |                         | Huvec,<br>HepG2,<br>K562 |         |            | STAT,TR4           | NARF                  | intronic |          |
| 17 | 80421110  | 0.95 | 0.99 | <a href="#">rs72859120</a>      | C  | T | 0.12 |                         | K562                     |         |            | Cart1,Hsf,Pdx<br>1 | NARF                  | intronic |          |
| 17 | 80423712  | 0.95 | 0.99 | <a href="#">rs12450240</a>      | G  | T | 0.12 |                         |                          |         |            | NARF               | intronic              |          |          |
| 17 | 80424386  | 0.96 | 0.99 | <a href="#">rs9891900</a>       | T  | G | 0.12 |                         |                          |         |            | 5 altered motifs   | NARF                  | intronic |          |
| 17 | 80427975  | 0.96 | 0.99 | <a href="#">rs72859125</a>      | G  | A | 0.12 |                         |                          |         |            | Crx,Pitx2          | NARF                  | intronic |          |
| 17 | 80428532  | 0.96 | 0.99 | <a href="#">rs12600876</a>      | G  | A | 0.12 |                         |                          |         |            | 4 altered motifs   | NARF                  | intronic |          |
| 17 | 80429066  | 0.96 | 0.99 | <a href="#">rs11153377</a><br>g | TC | T | 0.12 |                         |                          |         | HL-60,SAEC |                    | 6 altered motifs      | NARF     | intronic |
| 17 | 80439907  | 0.94 | 0.98 | <a href="#">rs9898723</a>       | A  | G | 0.12 |                         |                          |         | Fibrobl    |                    | TFII-I                | NARF     | intronic |
| 17 | 80439925  | 0.94 | 0.98 | <a href="#">rs9905527</a>       | T  | C | 0.12 |                         |                          | Fibrobl |            |                    | NARF                  | intronic |          |
| 3  | 121817613 | 1    | 1    | <a href="#">rs2681416</a>       | G  | A | 0.28 |                         | GM12878                  | Th2     |            | Zbtb12             | CD86                  | intronic |          |
| 18 | 42865210  | 1    | 1    | <a href="#">rs11082438</a>      | G  | T | 0.05 |                         |                          | FibroP  |            | 5 altered motifs   | 217kb 3' of<br>SETBP1 | intronic |          |
| 18 | 42866471  | 0.94 | 1    | <a href="#">rs11660485</a>      | A  | C | 0.04 |                         |                          |         |            | Pou1f1             | 218kb 3' of<br>SETBP1 | intronic |          |

**Table S6. Results from HaploReg analysis of newly discovered and promising follicular lymphoma risk loci outside HLA and their correlated ( $r^2 > 0.80$ ) surrogates.**

| AA/Allele/SNP  | Study     | Effect allele <sup>a</sup> | Other allele <sup>a</sup> | EAf <sup>b</sup> | Information <sup>c</sup> | OR   | 95% CI      | P        | P <sub>het</sub> |
|----------------|-----------|----------------------------|---------------------------|------------------|--------------------------|------|-------------|----------|------------------|
| AA DRβ1 28 Asp | NCI       | P                          | A                         | 0.684            | 0.999                    | 0.51 | (0.47-0.55) | 1.54E-61 |                  |
| AA DRβ1 28 Asp | UCSF2     | P                          | A                         | 0.676            | 1.003                    | 0.68 | (0.54-0.86) | 0.001    |                  |
| AA DRβ1 28 Asp | SCALE     | P                          | A                         | 0.712            | 0.976                    | 0.60 | (0.49-0.74) | 1.34E-06 |                  |
| AA DRβ1 28 Asp | UCSF1/NHS | P                          | A                         | 0.683            | 0.990                    | 0.42 | (0.29-0.60) | 2.61E-06 |                  |
| AA DRβ1 28 Asp | Combined  |                            |                           |                  |                          | 0.53 | (0.50-0.57) | 6.10E-72 | 0.03             |
| AA DRβ1 28 Glu | NCI       | P                          | A                         | 0.304            | 1.006                    | 1.95 | (1.80-2.11) | 1.78E-60 |                  |
| AA DRβ1 28 Glu | UCSF2     | P                          | A                         | 0.315            | 0.996                    | 1.45 | (1.15-1.82) | 0.002    |                  |
| AA DRβ1 28 Glu | SCALE     | P                          | A                         | 0.262            | 0.995                    | 1.57 | (1.27-1.94) | 2.28E-05 |                  |
| AA DRβ1 28 Glu | UCSF1/NHS | P                          | A                         | 0.308            | 1.007                    | 2.32 | (1.61-3.34) | 5.92E-06 |                  |
| AA DRβ1 28 Glu | Combined  |                            |                           |                  |                          | 1.86 | (1.74-2.00) | 7.99E-69 | 0.02             |
| HLA-DRB1*01    | NCI       | P                          | A                         | 0.137            | 1.003                    | 1.89 | (1.71-2.10) | 9.56E-35 |                  |
| HLA-DRB1*01    | UCSF2     | P                          | A                         | 0.144            | 1.025                    | 1.68 | (1.27-2.24) | 0.0003   |                  |
| HLA-DRB1*01    | SCALE     | P                          | A                         | 0.125            | 0.992                    | 1.71 | (1.30-2.25) | 0.0001   |                  |
| HLA-DRB1*01    | UCSF1/NHS | P                          | A                         | 0.129            | 1.044                    | 1.92 | (1.22-3.03) | 0.005    |                  |
| HLA-DRB1*01    | Combined  |                            |                           |                  |                          | 1.85 | (1.70-2.03) | 2.57E-42 | 0.81             |

<sup>a</sup>P=presence of allele, A=absence of allele

<sup>b</sup>EAf=effect allele frequency

<sup>c</sup>Information is the imputation quality score ( $r^2$ ) from Beagle

**Table S7. Top HLA amino acid and allele associations from the univariate analysis of HLA imputations.**

| AA Position | df | P_upperbound | P_lowerbound |
|-------------|----|--------------|--------------|
| AA DRB1 11  | 5  | 8.35e-70     | 5.41e-70     |
| AA DRB1 13  | 5  | 4.11e-70     | 2.67e-70     |
| AA DRB1 28  | 2  | 3.84e-67     | 2.49e-67     |
| AA DRB1 30  | 4  | 4.20e-66     | 2.72e-66     |

**Table S8. Global omnibus tests for associations between follicular lymphoma risk and DR $\beta$ 1 AA positions at 11, 13, 28 and 30.**

| DRB1 Allele | Frequency | Amino acid position |    |    |    | FL association model |              |              | <i>P</i> |
|-------------|-----------|---------------------|----|----|----|----------------------|--------------|--------------|----------|
|             |           | 11                  | 13 | 28 | 30 | OR                   | 95% CI lower | 95% CI upper |          |
| *01         | 0.137     | L                   | F  | E  | C  | 1.85                 | 1.70         | 2.02         | 2.91E-42 |
| *03:01      | 0.119     | S                   | S  | D  | Y  | 0.89                 | 0.81         | 0.99         | 2.55E-02 |
| *04         | 0.16      | V                   | H  | D  | Y  | 1.04                 | 0.96         | 1.14         | 3.20E-01 |
| *07:01      | 0.14      | G                   | Y  | E  | L  | 1.52                 | 1.39         | 1.66         | 1.59E-20 |
| *08:01      | 0.024     | S                   | G  | D  | Y  | 0.82                 | 0.66         | 1.03         | 8.28E-02 |
| *09:01      | 0.012     | D                   | F  | H  | G  | 1.34                 | 1            | 1.79         | 5.03E-02 |
| *10:01      | 0.009     | V                   | F  | E  | R  | NA                   | NA           | NA           | NA       |
| *11         | 0.09      | S                   | S  | D  | Y  | 0.62                 | 0.55         | 0.71         | 3.59E-13 |
| *12:01      | 0.018     | S                   | S  | E  | H  | 1.21                 | 0.96         | 1.52         | 1.12E-01 |
| *13         | 0.112     | S                   | S  | D  | Y  | 0.56                 | 0.50         | 0.63         | 5.32E-22 |
| *14:01      | 0.022     | S                   | S  | D  | Y  | 0.80                 | 0.62         | 1.02         | 7.22E-02 |
| *15:01      | 0.124     | P                   | R  | D  | Y  | 0.67                 | 0.60         | 0.74         | 1.01E-13 |
| *16:01      | 0.015     | P                   | R  | D  | Y  | 0.88                 | 0.66         | 1.18         | 3.95E-01 |

**Table S9. Follicular lymphoma (FL)-associated amino acid positions in HLA-DRβ1. Residue combinations of the DRβ1 amino acid positions 11, 13, 28, and 30 were associated with an increased risk of FL. Each DRB1 allele is shown with the observed frequency in controls and the amino acids carried by that allele, found in the IMMunoGeneTics/HLA Database, Release 3.15.0 (<http://www.ebi.ac.uk/ipd/imgt/hla/>).**

| LOCUS                                                                                             | GROUP            | EFFECT ALLELE | REF ALLELE | EFFECT ALLELE FREQ | INFO   | OR    | 95%CI lower | 95%CI upper | P        | P heterog. | I <sup>2</sup> |
|---------------------------------------------------------------------------------------------------|------------------|---------------|------------|--------------------|--------|-------|-------------|-------------|----------|------------|----------------|
| Step 0: Unconditional association analysis                                                        |                  |               |            |                    |        |       |             |             |          |            |                |
| AA DRB1 Glu-28                                                                                    | NCI              | P             | A          | 0.3039             | 1.0065 | 1.946 | 1.797       | 2.107       | 1.63E-60 |            |                |
| AA DRB1 Glu-28                                                                                    | SF               | P             | A          | 0.3149             | 0.996  | 1.45  | 1.152       | 1.824       | 0.00155  |            |                |
| AA DRB1 Glu-28                                                                                    | SCALE            | P             | A          | 0.2621             | 0.9946 | 1.565 | 1.27        | 1.928       | 2.62E-05 |            |                |
| AA DRB1 Glu-28                                                                                    | SF2              | P             | A          | 0.3087             | 1.0049 | 2.329 | 1.618       | 3.352       | 5.38E-06 |            |                |
| AA DRB1 Glu-28                                                                                    | NCI+SCALE+SF+SF2 |               |            |                    |        | 1.861 | 1.736       | 1.995       | 7.89E-69 | 1.98E-02   | 69.56          |
| AA DRB1 His-28                                                                                    | NCI              | P             | A          | 0.0122             | 0.9688 | 1.211 | 0.864       | 1.697       | 0.2661   |            |                |
| AA DRB1 His-28                                                                                    | SCALE            | P             | A          | 0.0253             | 0.9618 | 1.78  | 0.999       | 3.174       | 0.05048  |            |                |
| AA DRB1 His-28                                                                                    | NCI+SCALE        |               |            |                    |        | 1.336 | 0.998       | 1.787       | 5.16E-02 | 2.59E-01   | 21.56          |
| rs17203612                                                                                        | NCI              | A             | T          | 0.488              | 0.9648 | 1.903 | 1.759       | 2.059       | 9.39E-58 |            |                |
| rs17203612                                                                                        | SF               | A             | T          | 0.5092             | 0.9752 | 1.439 | 1.15        | 1.802       | 0.00148  |            |                |
| rs17203612                                                                                        | SCALE            | A             | T          | 0.5025             | 0.8121 | 1.769 | 1.431       | 2.187       | 1.34E-07 |            |                |
| rs17203612                                                                                        | SF2              | A             | T          | 0.4952             | 0.9015 | 1.833 | 1.271       | 2.643       | 0.00117  |            |                |
| rs17203612                                                                                        | NCI+SCALE+SF+SF2 |               |            |                    |        | 1.837 | 1.715       | 1.968       | 4.57E-67 | 1.43E-01   | 44.79          |
| rs3130437                                                                                         | NCI              | A             | C          | 0.6162             | 1.0059 | 1.288 | 1.192       | 1.393       | 1.72E-10 |            |                |
| rs3130437                                                                                         | SF               | A             | C          | 0.6429             | 1.0312 | 1.673 | 1.309       | 2.139       | 3.91E-05 |            |                |
| rs3130437                                                                                         | SCALE            | A             | C          | 0.5857             | 0.9768 | 1.296 | 1.069       | 1.57        | 0.00811  |            |                |
| rs3130437                                                                                         | SF2              | A             | C          | 0.6585             | 1.0378 | 1.859 | 1.278       | 2.703       | 0.00118  |            |                |
| rs3130437                                                                                         | NCI+SCALE+SF+SF2 |               |            |                    |        | 1.332 | 1.244       | 1.425       | 1.59E-16 | 6.77E-02   | 57.96          |
| Step 1: Conditional association analysis (conditioning on both AA DRB1 Glu-28 and AA DRB1 His-28) |                  |               |            |                    |        |       |             |             |          |            |                |
| rs17203612                                                                                        | NCI              | A             | T          | 0.488              | 0.9647 | 1.469 | 1.328       | 1.624       | 6.55E-14 |            |                |
| rs17203612                                                                                        | SF               | A             | T          | 0.5092             | 0.9752 | 1.247 | 0.941       | 1.652       | 0.1245   |            |                |
| rs17203612                                                                                        | SCALE            | A             | T          | 0.5025             | 0.8121 | 1.504 | 1.166       | 1.939       | 0.00164  |            |                |
| rs17203612                                                                                        | SF2              | A             | T          | 0.4952             | 0.9015 | 1.087 | 0.678       | 1.743       | 0.7278   |            |                |
| rs17203612                                                                                        | NCI+SCALE+SF+SF2 |               |            |                    |        | 1.435 | 1.315       | 1.566       | 4.59E-16 | 4.53E-01   | 0              |
| rs3130437                                                                                         | NCI              | A             | C          | 0.6162             | 1.006  | 1.191 | 1.1         | 1.29        | 1.72E-05 |            |                |
| rs3130437                                                                                         | SF               | A             | C          | 0.6429             | 1.0312 | 1.675 | 1.308       | 2.145       | 4.45E-05 |            |                |
| rs3130437                                                                                         | SCALE            | A             | C          | 0.5857             | 0.9768 | 1.225 | 1.007       | 1.491       | 0.04234  |            |                |
| rs3130437                                                                                         | SF2              | A             | C          | 0.6585             | 1.0378 | 1.617 | 1.098       | 2.38        | 0.01487  |            |                |
| rs3130437                                                                                         | NCI+SCALE+SF+SF2 |               |            |                    |        | 1.241 | 1.157       | 1.33        | 1.32E-09 | 3.75E-02   | 64.53          |

| Step 2: Conditional association analysis (conditioning on AA DRB1 Glu-28, AA DRB1 His-28 and rs114137077) |                  |   |   |        |        |       |       |       |          |               |
|-----------------------------------------------------------------------------------------------------------|------------------|---|---|--------|--------|-------|-------|-------|----------|---------------|
| rs3130437                                                                                                 | NCI              | A | C | 0.6162 | 1.006  | 1.179 | 1.088 | 1.277 | 5.82E-05 |               |
| rs3130437                                                                                                 | SF               | A | C | 0.6429 | 1.0312 | 1.672 | 1.305 | 2.144 | 4.94E-05 |               |
| rs3130437                                                                                                 | SCALE            | A | C | 0.5857 | 0.9768 | 1.208 | 0.992 | 1.472 | 0.06061  |               |
| rs3130437                                                                                                 | SF2              | A | C | 0.6585 | 1.0378 | 1.629 | 1.105 | 2.401 | 0.01371  |               |
| rs3130437                                                                                                 | NCI+SCALE+SF+SF2 |   |   |        |        | 1.229 | 1.145 | 1.318 | 8.23E-09 | 2.92E-02 66.7 |

**Table S10. Results of HLA forward stepwise conditional analysis.**





| SNP        | Position | Study     | Genotyped or imputed (info) | No. of cases/ controls | Effect allele/ other allele | EAF   | OR   | (95%CI)     | P        | <i>P</i> conditioned on DRB1 position 28, rs17203612 and rs3130437 | Reference                                          |
|------------|----------|-----------|-----------------------------|------------------------|-----------------------------|-------|------|-------------|----------|--------------------------------------------------------------------|----------------------------------------------------|
| rs6457327  | 31074030 | NCI       | g                           | 2142/6221              | C/A                         | 0.617 | 1.21 | (1.12-1.31) | 1.22E-06 | 0.10                                                               | (OR=1.68, P=4.7x10 <sup>-11</sup> ) <sup>52</sup>  |
|            |          | UCSF2     | g                           | 210/746                | C/A                         | 0.636 | 1.56 | (1.25-1.96) | 0.0001   |                                                                    |                                                    |
|            |          | SCALE     | g                           | 376/791                | C/A                         | 0.560 | 1.23 | (1.02-1.48) | 0.03     |                                                                    |                                                    |
|            |          | UCSF1/NHS | i (0.998)                   | 118/349                | C/A                         | 0.638 | 1.58 | (1.12-2.24) | 0.01     |                                                                    |                                                    |
|            |          | Combined  |                             | 2846/8107              |                             |       | 1.25 | (1.17-1.34) | 3.96E-11 |                                                                    |                                                    |
| rs3132453  | 31604044 | NCI       | g                           | 2142/6221              | G/T                         | 0.933 | 1.24 | (1.06-1.44) | 0.006    | 0.26                                                               | (OR=1.69, P=1.26x10 <sup>-6</sup> ) <sup>53</sup>  |
|            |          | UCSF2     | g                           | 210/746                | G/T                         | 0.937 | 1.71 | (1.05-2.78) | 0.03     |                                                                    |                                                    |
|            |          | SCALE     | g                           | 376/791                | G/T                         | 0.920 | 1.34 | (0.94-1.92) | 0.11     |                                                                    |                                                    |
|            |          | UCSF1/NHS | i (0.862)                   | 119/348                | G/T                         | 0.943 | 1.18 | (0.56-2.47) | 0.66     |                                                                    |                                                    |
|            |          | Combined  |                             | 2847/8106              |                             |       | 1.28 | (1.12-1.46) | 0.0003   |                                                                    |                                                    |
| rs9268853  | 3242643  | NCI       | g                           | 2142/6221              | C/T                         | 0.306 | 1.4  | (1.29-1.51) | 3.03E-17 | 0.03                                                               | (OR=1.56, P=2.48x10 <sup>-10</sup> ) <sup>29</sup> |
|            |          | UCSF2     | i (0.999)                   | 210/746                | C/T                         | 0.339 | 1.05 | (0.84-1.32) | 0.66     |                                                                    |                                                    |
|            |          | SCALE     | i (0.998)                   | 376/790                | C/T                         | 0.310 | 1.31 | (1.09-1.58) | 0.005    |                                                                    |                                                    |
|            |          | UCSF1/NHS | i (0.997)                   | 119/348                | C/T                         | 0.306 | 1.72 | (1.19-2.48) | 0.004    |                                                                    |                                                    |
|            |          | Combined  |                             | 2847/8105              |                             |       | 1.36 | (1.27-1.45) | 2.71E-19 |                                                                    |                                                    |
| rs2647012  | 32664458 | NCI       | i (1)                       | 2142/6221              | C/T                         | 0.601 | 1.58 | (1.46-1.71) | 1.14E-31 | 0.34                                                               | (OR=1.56, P=1.56x10 <sup>-21</sup> ) <sup>54</sup> |
|            |          | UCSF2     | g                           | 210/746                | C/T                         | 0.637 | 1.35 | (1.07-1.70) | 0.01     |                                                                    |                                                    |
|            |          | SCALE     | g                           | 376/791                | C/T                         | 0.564 | 1.62 | (1.34-1.96) | 6.45E-07 |                                                                    |                                                    |
|            |          | UCSF1/NHS | i (0.992)                   | 119/348                | C/T                         | 0.603 | 1.77 | (1.25-2.51) | 0.001    |                                                                    |                                                    |
|            |          | Combined  |                             | 2847/8106              |                             |       | 1.57 | (1.47-1.68) | 2.95E-40 |                                                                    |                                                    |
| rs10484561 | 32665420 | NCI       | i (1)                       | 2141/6221              | G/T                         | 0.121 | 1.87 | (1.68-2.07) | 3.11E-31 | 0.02                                                               | (OR=1.95, P=1.12x10 <sup>-29</sup> ) <sup>55</sup> |
|            |          | UCSF2     | i (1)                       | 210/746                | G/T                         | 0.131 | 1.83 | (1.35-2.47) | 9.66E-05 |                                                                    |                                                    |
|            |          | SCALE     | g                           | 376/791                | G/T                         | 0.114 | 1.71 | (1.31-2.23) | 7.61E-05 |                                                                    |                                                    |
|            |          | UCSF1/NHS | i (1)                       | 119/349                | G/T                         | 0.109 | 2.11 | (1.32-3.38) | 0.002    |                                                                    |                                                    |
|            |          | Combined  |                             | 2846/8107              |                             |       | 1.85 | (1.69-2.03) | 5.15E-40 |                                                                    |                                                    |

|                                     |          |           |           |           |     |       |      |             |          |          |                                                       |
|-------------------------------------|----------|-----------|-----------|-----------|-----|-------|------|-------------|----------|----------|-------------------------------------------------------|
| rs2621416                           | 32741868 | NCI       | g         | 2142/6221 | C/T | 0.276 | 1.42 | (1.31-1.55) | 3.21E-17 |          |                                                       |
|                                     |          | UCSF2     | i (0.981) | 210/745   | C/T | 0.272 | 1.3  | (1.01-1.65) | 0.04     |          |                                                       |
|                                     |          | SCALE     | i (0.979) | 376/790   | C/T | 0.281 | 1.36 | (1.11-1.67) | 0.003    |          |                                                       |
|                                     |          | UCSF1/NHS | i (0.950) | 119/349   | C/T | 0.262 | 1.59 | (1.08-2.35) | 0.02     |          |                                                       |
|                                     |          | Combined  |           | 2847/8105 |     |       | 1.41 | (1.31-1.51) | 4.96E-21 | 0.60     | (OR=1.57,<br>P=2.41×10 <sup>-9</sup> ) <sup>29</sup>  |
| rs241447                            | 32796751 | NCI       | g         | 2142/6221 | C/T | 0.269 | 1.32 | (1.21-1.43) | 3.55E-11 |          |                                                       |
|                                     |          | UCSF2     | g         | 210/746   | C/T | 0.265 | 1.34 | (1.06-1.71) | 0.02     |          |                                                       |
|                                     |          | SCALE     | g         | 376/791   | C/T | 0.243 | 1.19 | (0.96-1.48) | 0.11     |          |                                                       |
|                                     |          | UCSF1/NHS | g         | 119/349   | C/T | 0.274 | 1.6  | (1.10-2.32) | 0.01     |          |                                                       |
|                                     |          | Combined  |           | 2847/8107 |     |       | 1.32 | (1.22-1.41) | 5.48E-14 | 0.67     | (OR=1.82,<br>P=6.9 × 10 <sup>-8</sup> ) <sup>56</sup> |
| DRB1*0101                           |          | NCI       | i (0.975) | 2142/6221 | P/A | 0.107 | 1.92 | (1.71-2.16) | 1.32E-28 |          |                                                       |
|                                     |          | UCSF2     | i (1.000) | 210/746   | P/A | 0.102 | 1.68 | (1.20-2.36) | 0.003    |          |                                                       |
|                                     |          | SCALE     | i (1.005) | 376/791   | P/A | 0.114 | 1.66 | (1.26-2.20) | 0.0004   |          |                                                       |
|                                     |          | UCSF1/NHS | i (1.009) | 119/349   | P/A | 0.090 | 1.84 | (1.07-3.17) | 0.03     |          |                                                       |
|                                     |          | Combined  |           | 2847/8107 | P/A |       | 1.86 | (1.69-2.06) | 4.28E-34 | 5.45E-03 | (OR=2.14,<br>P<0.001) <sup>57</sup>                   |
| DPB1*0301                           |          | NCI       | i (0.898) | 2142/6221 | P/A | 0.102 | 0.49 | (0.40-0.60) | 6.78E-13 |          |                                                       |
|                                     |          | UCSF2     | i (0.952) | 210/746   | P/A | 0.094 | 0.55 | (0.30-1.02) | 0.06     |          |                                                       |
|                                     |          | SCALE     | i (0.899) | 376/791   | P/A | 0.094 | 0.59 | (0.39-0.91) | 0.02     |          |                                                       |
|                                     |          | UCSF1/NHS | i (0.785) | 119/349   | P/A | 0.110 | 0.7  | (0.33-1.49) | 0.35     |          |                                                       |
|                                     |          | Combined  |           | 2847/8107 | P/A |       | 0.52 | (0.44-0.61) | 6.83E-15 | 5.58E-05 | (OR=0.39,<br>P=4.61× 10 <sup>-4</sup> ) <sup>58</sup> |
| DRB1*13<br>(*1301, *1302,<br>*1303) |          | NCI       | i (0.985) | 2142/6221 | P/A | 0.112 | 0.55 | (0.48-0.63) | 8.26E-18 |          |                                                       |
|                                     |          | UCSF2     | i (0.984) | 210/746   | P/A | 0.096 | 0.7  | (0.46-1.05) | 0.08     |          |                                                       |
|                                     |          | SCALE     | i (0.987) | 376/791   | P/A | 0.119 | 0.53 | (0.38-0.74) | 0.0002   |          |                                                       |
|                                     |          | UCSF1/NHS | i (0.906) | 119/349   | P/A | 0.106 | 0.59 | (0.33-1.08) | 0.09     |          |                                                       |
|                                     |          | Combined  |           | 2847/8107 | P/A |       | 0.56 | (0.50-0.63) | 5.79E-22 | 4.91E-05 | (OR=0.48,<br>P=0.008) <sup>58</sup>                   |
| AA_DRB1_13<br>32660109_YF           |          | NCI       | i (0.998) | 2142/6221 | P/A | 0.297 | 1.96 | (1.81-2.13) | 1.20E-60 |          |                                                       |

|                           |           |           |           |     |       |      |             |          |          |                                                       |
|---------------------------|-----------|-----------|-----------|-----|-------|------|-------------|----------|----------|-------------------------------------------------------|
|                           | UCSF2     | i (1.024) | 210/746   | P/A | 0.304 | 1.49 | (1.18-1.87) | 0.0007   |          |                                                       |
|                           | SCALE     | i (0.966) | 376/791   | P/A | 0.264 | 1.67 | (1.35-2.06) | 2.26E-06 |          |                                                       |
|                           | UCSF1/NHS | i (1.028) | 119/349   | P/A | 0.292 | 2.18 | (1.53-3.12) | 1.89E-05 |          |                                                       |
|                           | Combined  |           | 2847/8107 | P/A |       | 1.88 | (1.76-2.02) | 1.61E-70 | 0.37     | (OR=1.76,<br>P=2.00×10 <sup>-14</sup> ) <sup>59</sup> |
| AA_DRB1_13<br>32660109_SR | NCI       | i (1.031) | 2142/6221 | P/A | 0.491 | 0.56 | (0.52-0.60) | 1.37E-51 |          |                                                       |
|                           | UCSF2     | i (0.981) | 210/746   | P/A | 0.477 | 0.75 | (0.60-0.94) | 0.01312  |          |                                                       |
|                           | SCALE     | i (1.012) | 376/791   | P/A | 0.463 | 0.57 | (0.47-0.69) | 1.38E-08 |          |                                                       |
|                           | UCSF1/NHS | i (1.012) | 119/349   | P/A | 0.502 | 0.48 | (0.34-0.68) | 4.43E-05 |          |                                                       |
|                           | Combined  |           | 2847/8107 | P/A |       | 0.57 | (0.53-0.61) | 5.11E-62 | 3.40E-01 | (OR=0.60,<br>P=6.51×10 <sup>-14</sup> ) <sup>59</sup> |

**Table S11. HLA SNPs, HLA alleles and amino acids previously reported as associated with risk of follicular lymphoma and p-values after conditioning on DRB1 position 28, rs17203612 and rs3130437.**



| PROXY      | SNP IN LD         | POS        | A1/A2 | r <sup>2</sup> SNP-<br>PROXY | PROBE                     | P        | FDR      | rho   |
|------------|-------------------|------------|-------|------------------------------|---------------------------|----------|----------|-------|
| rs12194148 | rs12194148        | 6:32444198 | G/T   | NA                           | <i>HLA-DRB6:NR_001298</i> | 2.98E-15 | 1.37E-12 | -0.9  |
| rs12194148 | rs12194148        | 6:32444198 | G/T   | NA                           | <i>HLA-DRB1:NM_002124</i> | 9.58E-07 | 9.77E-05 | 0.68  |
| rs12194148 | rs12194148        | 6:32444198 | G/T   | NA                           | <i>HLA-DQA2:NM_020056</i> | 2.24E-05 | 1.18E-03 | -0.61 |
| rs12194148 | rs12194148        | 6:32444198 | G/T   | NA                           | <i>HLA-DQB1:NM_002123</i> | 6.45E-05 | 3.02E-03 | 0.58  |
| rs12194148 | rs12194148        | 6:32444198 | G/T   | NA                           | <i>HLA-DQA1:NM_002122</i> | 2.66E-04 | 1.01E-02 | 0.54  |
| rs12194148 | rs12194148        | 6:32444198 | G/T   | NA                           | <i>HLA-DRB5:NM_002125</i> | 5.26E-04 | 1.77E-02 | 0.52  |
| rs12194148 | rs12194148        | 6:32444198 | G/T   | NA                           | <i>C6orf25:NM_138274</i>  | 1.05E-03 | 2.91E-02 | 0.49  |
| rs12194148 | rs12194148        | 6:32444198 | G/T   | NA                           | <i>C6orf25:NM_138275</i>  | 1.05E-03 | 2.91E-02 | 0.49  |
| rs12194148 | rs1964995         | 6:32449411 | T/C   | 1                            | <i>HLA-DRB6:NR_001298</i> | 2.48E-15 | 1.37E-12 | -0.91 |
| rs12194148 | rs1964995         | 6:32449411 | T/C   | 1                            | <i>HLA-DRB1:NM_002124</i> | 5.60E-06 | 4.28E-04 | 0.66  |
| rs12194148 | rs1964995         | 6:32449411 | T/C   | 1                            | <i>HLA-DQA2:NM_020056</i> | 6.83E-06 | 4.75E-04 | -0.66 |
| rs12194148 | rs1964995         | 6:32449411 | T/C   | 1                            | <i>HLA-DQB1:NM_002123</i> | 1.23E-04 | 5.55E-03 | 0.58  |
| rs12194148 | rs1964995         | 6:32449411 | T/C   | 1                            | <i>HLA-DRB5:NM_002125</i> | 5.40E-04 | 1.80E-02 | 0.53  |
| rs12194148 | rs1964995         | 6:32449411 | T/C   | 1                            | <i>HLA-DQA1:NM_002122</i> | 5.51E-04 | 1.81E-02 | 0.53  |
| rs12194148 | rs1964995         | 6:32449411 | T/C   | 1                            | <i>C6orf25:NM_138274</i>  | 1.64E-03 | 4.36E-02 | 0.49  |
| rs12194148 | rs1964995         | 6:32449411 | T/C   | 1                            | <i>C6orf25:NM_138275</i>  | 1.64E-03 | 4.36E-02 | 0.49  |
| rs12194148 | rs3998157         | 6:32678477 | C/A   | 0.86                         | <i>HLA-DRB6:NR_001298</i> | 6.04E-11 | 1.32E-08 | -0.87 |
| rs12194148 | rs3998157         | 6:32678477 | C/A   | 0.86                         | <i>HLA-DRB1:NM_002124</i> | 1.23E-06 | 1.22E-04 | 0.73  |
| rs12194148 | rs3998157         | 6:32678477 | C/A   | 0.86                         | <i>HLA-DQA2:NM_020056</i> | 2.65E-05 | 1.36E-03 | -0.66 |
| rs12194148 | <b>rs3998157*</b> | 6:32678477 | C/A   | 0.86                         | <i>HLA-DQB1:NM_002123</i> | 3.12E-05 | 1.59E-03 | 0.66  |
| rs12194148 | rs3998157         | 6:32678477 | C/A   | 0.86                         | <i>HLA-DQA1:NM_002122</i> | 7.86E-05 | 3.64E-03 | 0.63  |
| rs12194148 | rs3998157         | 6:32678477 | C/A   | 0.86                         | <i>HLA-DRB5:NM_002125</i> | 6.90E-04 | 2.21E-02 | 0.56  |
| rs12194148 | rs4273729         | 6:32678597 | C/G   | 0.85                         | <i>HLA-DRB6:NR_001298</i> | 9.79E-13 | 3.00E-10 | -0.86 |
| rs12194148 | rs4273729         | 6:32678597 | C/G   | 0.85                         | <i>HLA-DRB1:NM_002124</i> | 4.92E-07 | 7.28E-05 | 0.69  |
| rs12194148 | <b>rs4273729*</b> | 6:32678597 | C/G   | 0.85                         | <i>HLA-DQB1:NM_002123</i> | 7.84E-07 | 9.77E-05 | 0.68  |
| rs12194148 | rs4273729         | 6:32678597 | C/G   | 0.85                         | <i>HLA-DQA1:NM_002122</i> | 7.26E-06 | 4.75E-04 | 0.64  |
| rs12194148 | rs4273729         | 6:32678597 | C/G   | 0.85                         | <i>HLA-DQA2:NM_020056</i> | 7.35E-06 | 4.75E-04 | -0.64 |
| rs12194148 | rs4273729         | 6:32678597 | C/G   | 0.85                         | <i>HLA-DRB5:NM_002125</i> | 2.51E-04 | 1.01E-02 | 0.54  |
| rs12194148 | rs4273729         | 6:32678597 | C/G   | 0.85                         | <i>HLA-DQB2:NR_003937</i> | 3.36E-04 | 1.22E-02 | -0.53 |
| rs12194148 | rs4410767         | 6:32448129 | T/C   | 1                            | <i>HLA-DRB6:NR_001298</i> | 2.98E-15 | 1.37E-12 | -0.9  |
| rs12194148 | rs4410767         | 6:32448129 | T/C   | 1                            | <i>HLA-DRB1:NM_002124</i> | 9.58E-07 | 9.77E-05 | 0.68  |
| rs12194148 | rs4410767         | 6:32448129 | T/C   | 1                            | <i>HLA-DQA2:NM_020056</i> | 2.24E-05 | 1.18E-03 | -0.61 |
| rs12194148 | rs4410767         | 6:32448129 | T/C   | 1                            | <i>HLA-DQB1:NM_002123</i> | 6.45E-05 | 3.02E-03 | 0.58  |
| rs12194148 | rs4410767         | 6:32448129 | T/C   | 1                            | <i>HLA-DQA1:NM_002122</i> | 2.66E-04 | 1.01E-02 | 0.54  |

|            |                   |            |     |      |                           |          |          |       |
|------------|-------------------|------------|-----|------|---------------------------|----------|----------|-------|
| rs12194148 | rs4410767         | 6:32448129 | T/C | 1    | <i>HLA-DRB5:NM_002125</i> | 5.26E-04 | 1.77E-02 | 0.52  |
| rs12194148 | rs4410767         | 6:32448129 | T/C | 1    | <i>C6orf25:NM_138274</i>  | 1.05E-03 | 2.91E-02 | 0.49  |
| rs12194148 | rs4410767         | 6:32448129 | T/C | 1    | <i>C6orf25:NM_138275</i>  | 1.05E-03 | 2.91E-02 | 0.49  |
| rs12194148 | rs5007260         | 6:32379047 | G/A | 0.8  | <i>HLA-DRB6:NR_001298</i> | 5.40E-12 | 1.38E-09 | -0.85 |
| rs12194148 | rs5007260         | 6:32379047 | G/A | 0.8  | <i>HLA-DRB1:NM_002124</i> | 1.25E-06 | 1.22E-04 | 0.68  |
| rs12194148 | rs5007260         | 6:32379047 | G/A | 0.8  | <i>HLA-DQA2:NM_020056</i> | 1.23E-05 | 7.60E-04 | -0.63 |
| rs12194148 | rs5007260         | 6:32379047 | G/A | 0.8  | <i>HLA-DQB1:NM_002123</i> | 1.01E-04 | 4.62E-03 | 0.58  |
| rs12194148 | rs5007260         | 6:32379047 | G/A | 0.8  | <i>HLA-DQA1:NM_002122</i> | 1.34E-04 | 5.96E-03 | 0.57  |
| rs12194148 | rs5007260         | 6:32379047 | G/A | 0.8  | <i>HLA-DRB5:NM_002125</i> | 2.75E-04 | 1.03E-02 | 0.55  |
| rs12194148 | rs5020946         | 6:32450089 | G/T | 1    | <i>HLA-DRB6:NR_001298</i> | 2.98E-15 | 1.37E-12 | -0.9  |
| rs12194148 | rs5020946         | 6:32450089 | G/T | 1    | <i>HLA-DRB1:NM_002124</i> | 9.58E-07 | 9.77E-05 | 0.68  |
| rs12194148 | rs5020946         | 6:32450089 | G/T | 1    | <i>HLA-DQA2:NM_020056</i> | 2.24E-05 | 1.18E-03 | -0.61 |
| rs12194148 | rs5020946         | 6:32450089 | G/T | 1    | <i>HLA-DQB1:NM_002123</i> | 6.45E-05 | 3.02E-03 | 0.58  |
| rs12194148 | rs5020946         | 6:32450089 | G/T | 1    | <i>HLA-DQA1:NM_002122</i> | 2.66E-04 | 1.01E-02 | 0.54  |
| rs12194148 | rs5020946         | 6:32450089 | G/T | 1    | <i>HLA-DRB5:NM_002125</i> | 5.26E-04 | 1.77E-02 | 0.52  |
| rs12194148 | rs5020946         | 6:32450089 | G/T | 1    | <i>C6orf25:NM_138274</i>  | 1.05E-03 | 2.91E-02 | 0.49  |
| rs12194148 | rs5020946         | 6:32450089 | G/T | 1    | <i>C6orf25:NM_138275</i>  | 1.05E-03 | 2.91E-02 | 0.49  |
| rs12194148 | rs6932517         | 6:32678182 | C/G | 0.84 | <i>HLA-DRB6:NR_001298</i> | 2.66E-11 | 6.10E-09 | -0.84 |
| rs12194148 | rs6932517         | 6:32678182 | C/G | 0.84 | <i>HLA-DQA2:NM_020056</i> | 8.31E-07 | 9.77E-05 | -0.7  |
| rs12194148 | rs6932517         | 6:32678182 | C/G | 0.84 | <i>HLA-DRB1:NM_002124</i> | 9.11E-07 | 9.77E-05 | 0.7   |
| rs12194148 | <b>rs6932517*</b> | 6:32678182 | C/G | 0.84 | <i>HLA-DQB1:NM_002123</i> | 2.78E-06 | 2.45E-04 | 0.67  |
| rs12194148 | rs6932517         | 6:32678182 | C/G | 0.84 | <i>HLA-DQA1:NM_002122</i> | 2.06E-05 | 1.18E-03 | 0.63  |
| rs12194148 | rs6932517         | 6:32678182 | C/G | 0.84 | <i>HLA-DRB5:NM_002125</i> | 4.92E-04 | 1.76E-02 | 0.53  |
| rs12194148 | rs6932517         | 6:32678182 | C/G | 0.84 | <i>HLA-DQB2:NR_003937</i> | 7.68E-04 | 2.45E-02 | -0.52 |
| rs12194148 | rs6932517         | 6:32678182 | C/G | 0.84 | <i>BTNL2:NM_019602</i>    | 9.28E-04 | 2.88E-02 | 0.51  |
| rs12194148 | rs7748270         | 6:32448599 | C/T | 0.97 | <i>HLA-DRB6:NR_001298</i> | 2.98E-15 | 1.37E-12 | -0.9  |
| rs12194148 | rs7748270         | 6:32448599 | C/T | 0.97 | <i>HLA-DRB1:NM_002124</i> | 9.58E-07 | 9.77E-05 | 0.68  |
| rs12194148 | rs7748270         | 6:32448599 | C/T | 0.97 | <i>HLA-DQA2:NM_020056</i> | 2.24E-05 | 1.18E-03 | -0.61 |
| rs12194148 | rs7748270         | 6:32448599 | C/T | 0.97 | <i>HLA-DQB1:NM_002123</i> | 6.45E-05 | 3.02E-03 | 0.58  |
| rs12194148 | rs7748270         | 6:32448599 | C/T | 0.97 | <i>HLA-DQA1:NM_002122</i> | 2.66E-04 | 1.01E-02 | 0.54  |
| rs12194148 | rs7748270         | 6:32448599 | C/T | 0.97 | <i>HLA-DRB5:NM_002125</i> | 5.26E-04 | 1.77E-02 | 0.52  |
| rs12194148 | rs7748270         | 6:32448599 | C/T | 0.97 | <i>C6orf25:NM_138274</i>  | 1.05E-03 | 2.91E-02 | 0.49  |
| rs12194148 | rs7748270         | 6:32448599 | C/T | 0.97 | <i>C6orf25:NM_138275</i>  | 1.05E-03 | 2.91E-02 | 0.49  |
| rs12194148 | rs9271586         | 6:32590899 | G/T | 0.84 | <i>HLA-DRB6:NR_001298</i> | 1.64E-08 | 3.43E-06 | -0.82 |
| rs12194148 | rs9271586         | 6:32590899 | G/T | 0.84 | <i>HLA-DRB1:NM_002124</i> | 2.18E-04 | 9.25E-03 | 0.62  |
| rs12194148 | rs9271586         | 6:32590899 | G/T | 0.84 | <i>HLA-DQA2:NM_020056</i> | 1.51E-03 | 4.11E-02 | -0.55 |

|            |                   |            |     |      |                           |          |          |       |
|------------|-------------------|------------|-----|------|---------------------------|----------|----------|-------|
| rs12194148 | rs9271588         | 6:32590953 | T/C | 0.91 | <i>HLA-DRB6:NR_001298</i> | 5.28E-13 | 2.20E-10 | -0.88 |
| rs12194148 | rs9271588         | 6:32590953 | T/C | 0.91 | <i>HLA-DQA2:NM_020056</i> | 1.15E-05 | 7.30E-04 | -0.65 |
| rs12194148 | rs9271588         | 6:32590953 | T/C | 0.91 | <i>HLA-DRB1:NM_002124</i> | 1.21E-05 | 7.60E-04 | 0.65  |
| rs12194148 | <b>rs9271588*</b> | 6:32590953 | T/C | 0.91 | <i>HLA-DQB1:NM_002123</i> | 1.62E-04 | 7.08E-03 | 0.57  |
| rs12194148 | rs9271588         | 6:32590953 | T/C | 0.91 | <i>HLA-DRB5:NM_002125</i> | 8.46E-04 | 2.68E-02 | 0.52  |
| rs12194148 | rs9271588         | 6:32590953 | T/C | 0.91 | <i>HLA-DQA1:NM_002122</i> | 8.96E-04 | 2.80E-02 | 0.52  |
| rs12194148 | rs9275517         | 6:32674649 | A/G | 0.88 | <i>HLA-DRB6:NR_001298</i> | 8.60E-12 | 2.08E-09 | -0.88 |
| rs12194148 | rs9275517         | 6:32674649 | A/G | 0.88 | <i>HLA-DQA2:NM_020056</i> | 3.85E-06 | 3.10E-04 | -0.7  |
| rs12194148 | rs9275517         | 6:32674649 | A/G | 0.88 | <i>HLA-DRB1:NM_002124</i> | 3.96E-06 | 3.13E-04 | 0.7   |
| rs12194148 | <b>rs9275517*</b> | 6:32674649 | A/G | 0.88 | <i>HLA-DQB1:NM_002123</i> | 6.49E-06 | 4.75E-04 | 0.69  |
| rs12194148 | rs9275517         | 6:32674649 | A/G | 0.88 | <i>HLA-DQA1:NM_002122</i> | 2.63E-05 | 1.36E-03 | 0.65  |
| rs12194148 | rs9275517         | 6:32674649 | A/G | 0.88 | <i>HLA-DRB5:NM_002125</i> | 2.35E-04 | 9.89E-03 | 0.59  |
| rs12194148 | rs9275517         | 6:32674649 | A/G | 0.88 | <i>HLA-DQB2:NR_003937</i> | 1.03E-03 | 2.91E-02 | -0.54 |
| rs12194148 | rs9275517         | 6:32674649 | A/G | 0.88 | <i>BTNL2:NM_019602</i>    | 1.11E-03 | 3.07E-02 | 0.54  |
| rs12194148 | rs9275524         | 6:32675109 | T/C | 0.88 | <i>HLA-DRB6:NR_001298</i> | 3.63E-12 | 9.79E-10 | -0.86 |
| rs12194148 | <b>rs9275524*</b> | 6:32675109 | T/C | 0.88 | <i>HLA-DQB1:NM_002123</i> | 2.12E-06 | 1.91E-04 | 0.68  |
| rs12194148 | rs9275524         | 6:32675109 | T/C | 0.88 | <i>HLA-DRB1:NM_002124</i> | 3.23E-06 | 2.75E-04 | 0.68  |
| rs12194148 | rs9275524         | 6:32675109 | T/C | 0.88 | <i>HLA-DQA2:NM_020056</i> | 3.63E-06 | 2.97E-04 | -0.67 |
| rs12194148 | rs9275524         | 6:32675109 | T/C | 0.88 | <i>HLA-DQA1:NM_002122</i> | 2.16E-05 | 1.18E-03 | 0.63  |
| rs12194148 | rs9275524         | 6:32675109 | T/C | 0.88 | <i>HLA-DRB5:NM_002125</i> | 2.08E-04 | 8.92E-03 | 0.57  |
| rs12194148 | rs9275524         | 6:32675109 | T/C | 0.88 | <i>HLA-DQB2:NR_003937</i> | 6.83E-04 | 2.21E-02 | -0.53 |
| rs12194148 | rs9275565         | 6:32677938 | T/C | 0.85 | <i>HLA-DRB6:NR_001298</i> | 9.79E-13 | 3.00E-10 | -0.86 |
| rs12194148 | rs9275565         | 6:32677938 | T/C | 0.85 | <i>HLA-DRB1:NM_002124</i> | 4.92E-07 | 7.28E-05 | 0.69  |
| rs12194148 | <b>rs9275565*</b> | 6:32677938 | T/C | 0.85 | <i>HLA-DQB1:NM_002123</i> | 7.84E-07 | 9.77E-05 | 0.68  |
| rs12194148 | rs9275565         | 6:32677938 | T/C | 0.85 | <i>HLA-DQA1:NM_002122</i> | 7.26E-06 | 4.75E-04 | 0.64  |
| rs12194148 | rs9275565         | 6:32677938 | T/C | 0.85 | <i>HLA-DQA2:NM_020056</i> | 7.35E-06 | 4.75E-04 | -0.64 |
| rs12194148 | rs9275565         | 6:32677938 | T/C | 0.85 | <i>HLA-DRB5:NM_002125</i> | 2.51E-04 | 1.01E-02 | 0.54  |
| rs12194148 | rs9275565         | 6:32677938 | T/C | 0.85 | <i>HLA-DQB2:NR_003937</i> | 3.36E-04 | 1.22E-02 | -0.53 |
| rs12194148 | rs9275572         | 6:32678999 | A/G | 0.88 | <i>HLA-DRB6:NR_001298</i> | 3.63E-12 | 9.79E-10 | -0.86 |
| rs12194148 | <b>rs9275572*</b> | 6:32678999 | A/G | 0.88 | <i>HLA-DQB1:NM_002123</i> | 2.12E-06 | 1.91E-04 | 0.68  |
| rs12194148 | rs9275572         | 6:32678999 | A/G | 0.88 | <i>HLA-DRB1:NM_002124</i> | 3.23E-06 | 2.75E-04 | 0.68  |
| rs12194148 | rs9275572         | 6:32678999 | A/G | 0.88 | <i>HLA-DQA2:NM_020056</i> | 3.63E-06 | 2.97E-04 | -0.67 |
| rs12194148 | rs9275572         | 6:32678999 | A/G | 0.88 | <i>HLA-DQA1:NM_002122</i> | 2.16E-05 | 1.18E-03 | 0.63  |
| rs12194148 | rs9275572         | 6:32678999 | A/G | 0.88 | <i>HLA-DRB5:NM_002125</i> | 2.08E-04 | 8.92E-03 | 0.57  |
| rs12194148 | rs9275572         | 6:32678999 | A/G | 0.88 | <i>HLA-DQB2:NR_003937</i> | 6.83E-04 | 2.21E-02 | -0.53 |
| rs12194148 | rs9275573         | 6:32679146 | C/G | 0.85 | <i>HLA-DRB6:NR_001298</i> | 9.79E-13 | 3.00E-10 | -0.86 |

|            |                   |            |     |      |                           |          |          |       |
|------------|-------------------|------------|-----|------|---------------------------|----------|----------|-------|
| rs12194148 | rs9275573         | 6:32679146 | C/G | 0.85 | <i>HLA-DRB1:NM_002124</i> | 4.92E-07 | 7.28E-05 | 0.69  |
| rs12194148 | <b>rs9275573*</b> | 6:32679146 | C/G | 0.85 | <i>HLA-DQB1:NM_002123</i> | 7.84E-07 | 9.77E-05 | 0.68  |
| rs12194148 | rs9275573         | 6:32679146 | C/G | 0.85 | <i>HLA-DQA1:NM_002122</i> | 7.26E-06 | 4.75E-04 | 0.64  |
| rs12194148 | rs9275573         | 6:32679146 | C/G | 0.85 | <i>HLA-DQA2:NM_020056</i> | 7.35E-06 | 4.75E-04 | -0.64 |
| rs12194148 | rs9275573         | 6:32679146 | C/G | 0.85 | <i>HLA-DRB5:NM_002125</i> | 2.51E-04 | 1.01E-02 | 0.54  |
| rs12194148 | rs9275573         | 6:32679146 | C/G | 0.85 | <i>HLA-DQB2:NR_003937</i> | 3.36E-04 | 1.22E-02 | -0.53 |
| rs12194148 | rs9378212         | 6:32445691 | C/T | 1    | <i>HLA-DRB6:NR_001298</i> | 2.98E-15 | 1.37E-12 | -0.9  |
| rs12194148 | rs9378212         | 6:32445691 | C/T | 1    | <i>HLA-DRB1:NM_002124</i> | 9.58E-07 | 9.77E-05 | 0.68  |
| rs12194148 | rs9378212         | 6:32445691 | C/T | 1    | <i>HLA-DQA2:NM_020056</i> | 2.24E-05 | 1.18E-03 | -0.61 |
| rs12194148 | rs9378212         | 6:32445691 | C/T | 1    | <i>HLA-DQB1:NM_002123</i> | 6.45E-05 | 3.02E-03 | 0.58  |
| rs12194148 | rs9378212         | 6:32445691 | C/T | 1    | <i>HLA-DQA1:NM_002122</i> | 2.66E-04 | 1.01E-02 | 0.54  |
| rs12194148 | rs9378212         | 6:32445691 | C/T | 1    | <i>HLA-DRB5:NM_002125</i> | 5.26E-04 | 1.77E-02 | 0.52  |
| rs12194148 | rs9378212         | 6:32445691 | C/T | 1    | <i>C6orf25:NM_138274</i>  | 1.05E-03 | 2.91E-02 | 0.49  |
| rs12194148 | rs9378212         | 6:32445691 | C/T | 1    | <i>C6orf25:NM_138275</i>  | 1.05E-03 | 2.91E-02 | 0.49  |
| rs12194148 | rs9378213         | 6:32448398 | T/G | 1    | <i>HLA-DRB6:NR_001298</i> | 2.98E-15 | 1.37E-12 | -0.9  |
| rs12194148 | rs9378213         | 6:32448398 | T/G | 1    | <i>HLA-DRB1:NM_002124</i> | 9.58E-07 | 9.77E-05 | 0.68  |
| rs12194148 | rs9378213         | 6:32448398 | T/G | 1    | <i>HLA-DQA2:NM_020056</i> | 2.24E-05 | 1.18E-03 | -0.61 |
| rs12194148 | rs9378213         | 6:32448398 | T/G | 1    | <i>HLA-DQB1:NM_002123</i> | 6.45E-05 | 3.02E-03 | 0.58  |
| rs12194148 | rs9378213         | 6:32448398 | T/G | 1    | <i>HLA-DQA1:NM_002122</i> | 2.66E-04 | 1.01E-02 | 0.54  |
| rs12194148 | rs9378213         | 6:32448398 | T/G | 1    | <i>HLA-DRB5:NM_002125</i> | 5.26E-04 | 1.77E-02 | 0.52  |
| rs12194148 | rs9378213         | 6:32448398 | T/G | 1    | <i>C6orf25:NM_138274</i>  | 1.05E-03 | 2.91E-02 | 0.49  |
| rs12194148 | rs9378213         | 6:32448398 | T/G | 1    | <i>C6orf25:NM_138275</i>  | 1.05E-03 | 2.91E-02 | 0.49  |
| rs12194148 | rs9378264         | 6:32443451 | G/A | 1    | <i>HLA-DRB6:NR_001298</i> | 2.48E-15 | 1.37E-12 | -0.91 |
| rs12194148 | rs9378264         | 6:32443451 | G/A | 1    | <i>HLA-DRB1:NM_002124</i> | 5.60E-06 | 4.28E-04 | 0.66  |
| rs12194148 | rs9378264         | 6:32443451 | G/A | 1    | <i>HLA-DQA2:NM_020056</i> | 6.83E-06 | 4.75E-04 | -0.66 |
| rs12194148 | rs9378264         | 6:32443451 | G/A | 1    | <i>HLA-DQB1:NM_002123</i> | 1.23E-04 | 5.55E-03 | 0.58  |
| rs12194148 | rs9378264         | 6:32443451 | G/A | 1    | <i>HLA-DRB5:NM_002125</i> | 5.40E-04 | 1.80E-02 | 0.53  |
| rs12194148 | rs9378264         | 6:32443451 | G/A | 1    | <i>HLA-DQA1:NM_002122</i> | 5.51E-04 | 1.81E-02 | 0.53  |
| rs12194148 | rs9378264         | 6:32443451 | G/A | 1    | <i>C6orf25:NM_138274</i>  | 1.64E-03 | 4.36E-02 | 0.49  |
| rs12194148 | rs9378264         | 6:32443451 | G/A | 1    | <i>C6orf25:NM_138275</i>  | 1.64E-03 | 4.36E-02 | 0.49  |
| rs12194148 | rs9378266         | 6:32448189 | G/T | 1    | <i>HLA-DRB6:NR_001298</i> | 2.98E-15 | 1.37E-12 | -0.9  |
| rs12194148 | rs9378266         | 6:32448189 | G/T | 1    | <i>HLA-DRB1:NM_002124</i> | 9.58E-07 | 9.77E-05 | 0.68  |
| rs12194148 | rs9378266         | 6:32448189 | G/T | 1    | <i>HLA-DQA2:NM_020056</i> | 2.24E-05 | 1.18E-03 | -0.61 |
| rs12194148 | rs9378266         | 6:32448189 | G/T | 1    | <i>HLA-DQB1:NM_002123</i> | 6.45E-05 | 3.02E-03 | 0.58  |
| rs12194148 | rs9378266         | 6:32448189 | G/T | 1    | <i>HLA-DQA1:NM_002122</i> | 2.66E-04 | 1.01E-02 | 0.54  |
| rs12194148 | rs9378266         | 6:32448189 | G/T | 1    | <i>HLA-DRB5:NM_002125</i> | 5.26E-04 | 1.77E-02 | 0.52  |



|            |                   |            |     |      |                           |          |          |       |
|------------|-------------------|------------|-----|------|---------------------------|----------|----------|-------|
| rs12194148 | rs9378266         | 6:32448189 | G/T | 1    | <i>C6orf25:NM_138274</i>  | 1.05E-03 | 2.91E-02 | 0.49  |
| rs12194148 | rs9378266         | 6:32448189 | G/T | 1    | <i>C6orf25:NM_138275</i>  | 1.05E-03 | 2.91E-02 | 0.49  |
| rs12194148 | rs9380318         | 6:32677669 | C/T | 0.85 | <i>HLA-DRB6:NR_001298</i> | 9.79E-13 | 3.00E-10 | -0.86 |
| rs12194148 | rs9380318         | 6:32677669 | C/T | 0.85 | <i>HLA-DRB1:NM_002124</i> | 4.92E-07 | 7.28E-05 | 0.69  |
| rs12194148 | <b>rs9380318*</b> | 6:32677669 | C/T | 0.85 | <i>HLA-DQB1:NM_002123</i> | 7.84E-07 | 9.77E-05 | 0.68  |
| rs12194148 | rs9380318         | 6:32677669 | C/T | 0.85 | <i>HLA-DQA1:NM_002122</i> | 7.26E-06 | 4.75E-04 | 0.64  |
| rs12194148 | rs9380318         | 6:32677669 | C/T | 0.85 | <i>HLA-DQA2:NM_020056</i> | 7.35E-06 | 4.75E-04 | -0.64 |
| rs12194148 | rs9380318         | 6:32677669 | C/T | 0.85 | <i>HLA-DRB5:NM_002125</i> | 2.51E-04 | 1.01E-02 | 0.54  |
| rs12194148 | rs9380318         | 6:32677669 | C/T | 0.85 | <i>HLA-DQB2:NR_003937</i> | 3.36E-04 | 1.22E-02 | -0.53 |
| rs12194148 | rs9391786         | 6:32448561 | A/G | 1    | <i>HLA-DRB6:NR_001298</i> | 2.98E-15 | 1.37E-12 | -0.9  |
| rs12194148 | rs9391786         | 6:32448561 | A/G | 1    | <i>HLA-DRB1:NM_002124</i> | 9.58E-07 | 9.77E-05 | 0.68  |
| rs12194148 | rs9391786         | 6:32448561 | A/G | 1    | <i>HLA-DQA2:NM_020056</i> | 2.24E-05 | 1.18E-03 | -0.61 |
| rs12194148 | rs9391786         | 6:32448561 | A/G | 1    | <i>HLA-DQB1:NM_002123</i> | 6.45E-05 | 3.02E-03 | 0.58  |
| rs12194148 | rs9391786         | 6:32448561 | A/G | 1    | <i>HLA-DQA1:NM_002122</i> | 2.66E-04 | 1.01E-02 | 0.54  |
| rs12194148 | rs9391786         | 6:32448561 | A/G | 1    | <i>HLA-DRB5:NM_002125</i> | 5.26E-04 | 1.77E-02 | 0.52  |
| rs12194148 | rs9391786         | 6:32448561 | A/G | 1    | <i>C6orf25:NM_138274</i>  | 1.05E-03 | 2.91E-02 | 0.49  |
| rs12194148 | rs9391786         | 6:32448561 | A/G | 1    | <i>C6orf25:NM_138275</i>  | 1.05E-03 | 2.91E-02 | 0.49  |
| rs3130439  | rs11962994        | 6:31219289 | A/G | 0.94 | <i>PSORS1C3:NR_026816</i> | 3.18E-07 | 5.40E-05 | 0.73  |
| rs3130439  | rs11967600        | 6:31199573 | T/C | 0.82 | <i>PSORS1C3:NR_026816</i> | 1.60E-04 | 7.05E-03 | 0.61  |
| rs3130439  | rs11967600        | 6:31199573 | T/C | 0.82 | <i>PSORS1C2:NM_014069</i> | 3.52E-04 | 1.27E-02 | 0.58  |
| rs3130439  | rs2394892         | 6:31205382 | A/G | 0.89 | <i>PSORS1C3:NR_026816</i> | 2.79E-07 | 4.93E-05 | 0.72  |
| rs3130439  | rs28397299        | 6:31207704 | A/G | 0.83 | <i>PSORS1C3:NR_026816</i> | 1.64E-05 | 9.89E-04 | 0.64  |
| rs3130439  | rs3130439         | 6:31221023 | G/A | NA   | <i>PSORS1C3:NR_026816</i> | 1.32E-05 | 8.10E-04 | 0.65  |
| rs3130439  | rs3130439         | 6:31221023 | G/A | NA   | <i>PSORS1C2:NM_014069</i> | 1.39E-03 | 3.81E-02 | 0.51  |
| rs3130439  | rs3130439         | 6:31221023 | G/A | NA   | <i>DPCR1:NM_080870</i>    | 1.55E-03 | 4.21E-02 | -0.5  |
| rs3130439  | rs3869117         | 6:31205923 | G/C | 0.93 | <i>PSORS1C3:NR_026816</i> | 1.38E-06 | 1.31E-04 | 0.68  |
| rs3130439  | rs3869117         | 6:31205923 | G/C | 0.93 | <i>PSORS1C2:NM_014069</i> | 8.94E-04 | 2.80E-02 | 0.5   |
| rs3130439  | rs6457350         | 6:31204109 | C/T | 0.87 | <i>PSORS1C3:NR_026816</i> | 1.79E-06 | 1.68E-04 | 0.68  |
| rs3130439  | rs6908994         | 6:31198709 | T/C | 0.89 | <i>PSORS1C3:NR_026816</i> | 2.79E-07 | 4.93E-05 | 0.72  |
| rs3130439  | rs7745906         | 6:31204008 | A/G | 0.89 | <i>PSORS1C3:NR_026816</i> | 2.77E-07 | 4.93E-05 | 0.73  |
| rs3130439  | rs7768431         | 6:31202665 | A/G | 0.89 | <i>PSORS1C3:NR_026816</i> | 2.36E-07 | 4.71E-05 | 0.71  |

A1/A2 = minor/major allele in HapMap-CEU r28. Gene expression changes were estimated for the minor allele.

\*The highlighted eQTLs also showed significant correlation with lower methylation levels in the same gene.

**Table S12. Results from the eQTL analysis of rs12194148 and rs3130439, proxies, respectively, for the independent markers in the HLA forward stepwise analysis, rs17203612 and rs3130437.** eQTL analysis was performed using a publicly available RNA Seq dataset (GEO accession number GSE16921) containing

whole-genome gene expression data in transformed lymphoblastoid cell lines from 41 HapMap-CEU samples. Whole-genome genotyping data for the same HapMap-CEU individuals (release #28) were directly downloaded from HapMap. As the two SNPs that remained statistically significant in the stepwise conditional analysis, rs17203612 and rs3130439, were not available in HapMap, rs12194148 ( $r^2 = 0.98$  with rs17203612) and rs3130439 ( $r^2 = 0.93$  with rs3130437) were selected as proxies, and the eQTL analysis was conducted on these two proxies and SNPs in LD ( $r^2 > 0.8$ ) by correlating genotype and expression levels of probes within 1Mb of the SNPs. Correlation between expression and genotype for each SNP-probe pair was tested using the Spearman's rank test with t-distribution approximation and were estimated with respect to the minor allele in HapMap-CEU. *P*-values were adjusted for multiple comparisons using the Benjamini-Hochberg false-discovery rate (FDR) and eQTL were considered statistically significant at an FDR *P*-value threshold  $< 0.05$ .

| PROXY      | SNP in LD         | POS        | A1/A2 <sup>a</sup> | PROBE      | GENE     | RHO   | P        | FDR      |
|------------|-------------------|------------|--------------------|------------|----------|-------|----------|----------|
| rs12194148 | <b>rs3998157*</b> | 6:32678477 | C/A                | cg01889448 | HLA-DQB1 | -0.48 | 7.15E-06 | 3.86E-05 |
| rs12194148 | <b>rs4273729*</b> | 6:32678597 | C/G                | cg01889448 | HLA-DQB1 | -0.45 | 8.53E-06 | 4.19E-05 |
| rs12194148 | <b>rs6932517*</b> | 6:32678182 | C/G                | cg01889448 | HLA-DQB1 | -0.46 | 1.36E-05 | 5.46E-05 |
| rs12194148 | rs9271586         | 6:32590899 | G/T                | cg01889448 | HLA-DQB1 | -0.48 | 1.42E-05 | 5.46E-05 |
| rs12194148 | <b>rs9271588*</b> | 6:32590953 | T/C                | cg01889448 | HLA-DQB1 | -0.47 | 9.33E-06 | 4.20E-05 |
| rs12194148 | <b>rs9275517*</b> | 6:32674649 | A/G                | cg01889448 | HLA-DQB1 | -0.47 | 1.63E-05 | 5.86E-05 |
| rs12194148 | <b>rs9275524*</b> | 6:32675109 | T/C                | cg01889448 | HLA-DQB1 | -0.45 | 2.43E-05 | 7.72E-05 |
| rs12194148 | <b>rs9275565*</b> | 6:32677938 | T/C                | cg01889448 | HLA-DQB1 | -0.47 | 3.74E-06 | 2.79E-05 |
| rs12194148 | <b>rs9275572*</b> | 6:32678999 | A/G                | cg01889448 | HLA-DQB1 | -0.45 | 2.43E-05 | 7.72E-05 |
| rs12194148 | <b>rs9275573*</b> | 6:32679146 | C/G                | cg01889448 | HLA-DQB1 | -0.47 | 3.74E-06 | 2.79E-05 |
| rs12194148 | <b>rs9380318*</b> | 6:32677669 | C/T                | cg01889448 | HLA-DQB1 | -0.47 | 4.12E-06 | 2.79E-05 |
| rs3130439  | rs11962994        | 6:31219289 | A/G                | cg10409680 | HLA-C    | 0.43  | 6.10E-05 | 1.65E-04 |
| rs3130439  | rs11967600        | 6:31199573 | T/C                | cg10409680 | HLA-C    | 0.4   | 4.70E-04 | 1.21E-03 |
| rs3130439  | rs2394892         | 6:31205382 | A/G                | cg10409680 | HLA-C    | 0.49  | 3.98E-06 | 2.79E-05 |
| rs3130439  | rs28397299        | 6:31207704 | A/G                | cg10409680 | HLA-C    | 0.49  | 4.13E-06 | 2.79E-05 |
| rs3130439  | rs3130439         | 6:31221023 | G/A                | cg10409680 | HLA-C    | 0.43  | 3.28E-05 | 9.85E-05 |
| rs3130439  | rs3869117         | 6:31205923 | G/C                | cg10409680 | HLA-C    | 0.47  | 2.58E-06 | 2.79E-05 |
| rs3130439  | rs6457350         | 6:31204109 | C/T                | cg10409680 | HLA-C    | 0.43  | 3.56E-05 | 1.01E-04 |
| rs3130439  | rs6908994         | 6:31198709 | T/C                | cg10409680 | HLA-C    | 0.49  | 3.98E-06 | 2.79E-05 |
| rs3130439  | rs7745906         | 6:31204008 | A/G                | cg10409680 | HLA-C    | 0.5   | 3.25E-06 | 2.79E-05 |
| rs3130439  | rs7768431         | 6:31202665 | A/G                | cg10409680 | HLA-C    | 0.46  | 5.37E-06 | 3.22E-05 |

<sup>a</sup>A1/A2 = minor/major allele in HapMap-CEU r28. Methylation changes were estimated for the minor allele.

\*The highlighted meQTLs also showed significant correlation with higher expression levels in the same gene

**Table S13. Results from the meQTL analysis of rs12194148 and rs3130439, proxies, respectively, for the independent markers in the conditional analysis, rs17203612 and rs3130437.** meQTL analysis was performed using a publicly available dataset (GEO accession number GSE27146) that contained 27,578 DNA methylation measurements near the transcription start sites of 14,000 genes in 180 HapMap samples. Methylation probes were mapped to the human genome sequence (hg19) using BLAT and those that mapped to multiple locations with up to two mismatches were discarded, leaving 26,375 probes for analysis. Only the 90 samples of CEU origin were used in this study, and only SNPs and methylation probes that were located within 50kb were tested for association. Correlation between SNP genotypes and methylation levels was tested using the Spearman's rank correlation test and estimated with respect to the minor allele in HapMap-CEU. meQTL were considered significant at an FDR adjusted *P*-value < 0.05.

| SNP       | Gene transcript | Effect allele | Other allele | Beta for NHL SNP <sup>a</sup> | P for NHL SNP <sup>a</sup> | P for NHL SNP conditioned on peak SNP <sup>b</sup> | Peak SNP for transcript <sup>c</sup> | Beta for Peak SNP <sup>d</sup> | P for Peak SNP <sup>d</sup> | P for peak SNP conditioned on NHL SNP <sup>e</sup> |
|-----------|-----------------|---------------|--------------|-------------------------------|----------------------------|----------------------------------------------------|--------------------------------------|--------------------------------|-----------------------------|----------------------------------------------------|
| rs3130437 | <i>HCG22</i>    | C             | A            | -2.215                        | 2.03E-12                   | 0.82                                               | rs116195588                          | -2.034                         | 7.56E-27                    | 4.58E-20                                           |
| rs3130437 | <i>HCG27</i>    | C             | A            | 1.650                         | 7.10E-10                   | 0.42                                               | rs116794933                          | -0.615                         | 5.86E-14                    | 2.36E-07                                           |
| rs3130437 | <i>HLA-C</i>    | C             | A            | 0.882                         | 1.13E-07                   | 0.007                                              | rs116398710                          | 0.556                          | 1.21E-11                    | 1.13E-07                                           |
| rs3130437 | <i>HLA-C</i>    | C             | A            | 0.760                         | 4.24E-07                   | 0.08                                               | rs149683222                          | -0.198                         | 3.85E-10                    | 3.11E-05                                           |
| rs3130437 | <i>TCF19</i>    | C             | A            | 0.847                         | 5.74E-06                   | 0.002                                              | rs140242258                          | 0.830                          | 1.05E-28                    | 8.51E-28                                           |
| rs3130437 | <i>HLA-B</i>    | C             | A            | 0.617                         | 2.53E-05                   | 0.002                                              | rs140242258                          | 0.461                          | 3.51E-15                    | 1.03E-13                                           |

<sup>a</sup>Beta and p-value for the association between the NHL SNP and gene transcript.

<sup>b</sup>p-value for the association between the NHL SNP and gene transcript after adjustment for the peak SNP

<sup>c</sup>Peak SNP is the most significant SNP associated with the gene transcript

<sup>d</sup>Beta and p-value for the association between the peak SNP and the gene transcript

<sup>e</sup>P-value for the association between the peak SNP and the gene transcript after adjustment for the NHL SNP

**Table S14. Expression quantitative trait loci (eQTL) associations with FDR < 1% from the childhood asthma dataset in the HLA region.** eQTL analysis was conducted using a publicly available childhood asthma microarray dataset (GEO accession number GSE8052). As described previously for this dataset, peripheral blood lymphocytes were transformed into lymphoblastoid cell lines for 830 parents and offspring from 206 families of European ancestry. Using extracted RNA, gene expression was assessed with the Affymetrix HG-U133 Plus 2.0 chip. Genotyping was conducted using the Illumina Human1M Beadchip and Illumina HumanHap300K Beadchip, and imputation performed using data from 1000 Genomes Project. All SNPs selected for replication were tested for *cis* associations (defined as gene transcripts within 1 Mb), assuming an additive genetic model, adjusting for non-genetic effects in the gene expression value. To gain insight into the relative importance of eQTL associations with our SNPs compared to other SNPs in the region with stronger eQTL associations, we also conducted conditional analyses, in which both the FL SNP and the most significant SNP for the particular gene transcript (i.e., the peak SNP) were included in the same model. Only *cis* associations that reached  $P < 6.8 \times 10^{-5}$ , which corresponds to a FDR of 1% are reported.



| chr | pos (hg19) | LD (r <sup>2</sup> ) | LD (D') | variant                     | Ref          | Alt | EUR freq | Enhancer Histone marks | DNase | Proteins bound | eQTL tissues | Motifs changed      | GENCODE genes      | dbSNP func annot |
|-----|------------|----------------------|---------|-----------------------------|--------------|-----|----------|------------------------|-------|----------------|--------------|---------------------|--------------------|------------------|
| 6   | 31220895   | 1                    | 1       | <a href="#">rs3130437</a>   | A            | C   | 0.61     |                        |       |                |              | 4 altered motifs    | 16kb 3' of HLA-C   |                  |
| 6   | 31221153   | 0.93                 | 0.98    | <a href="#">rs2394946</a>   | G            | A   | 0.61     |                        |       |                |              | Ncx,Pou1f1,Sox      | 15kb 3' of HLA-C   |                  |
| 6   | 32442836   | 0.83                 | 0.97    | <a href="#">rs13211921</a>  | T            | G   | 0.43     |                        |       |                |              | 13 altered motifs   | 30kb 3' of HLA-DRA |                  |
| 6   | 32443172   | 0.92                 | 0.97    | <a href="#">rs9391879</a>   | C            | T   | 0.45     |                        |       |                |              | SZF1-1,Spz1         | 30kb 3' of HLA-DRA |                  |
| 6   | 32443451   | 0.89                 | 0.95    | <a href="#">rs9378264</a>   | G            | A   | 0.45     | K562                   |       |                |              |                     | 31kb 3' of HLA-DRA |                  |
| 6   | 32443666   | 0.8                  | 0.97    | <a href="#">rs28895242</a>  | G            | C   | 0.42     |                        |       |                |              | CEBPA,STAT          | 31kb 3' of HLA-DRA |                  |
| 6   | 32444198   | 0.92                 | 0.97    | <a href="#">rs12194148</a>  | G            | T   | 0.45     |                        |       |                |              |                     | 31kb 3' of HLA-DRA |                  |
| 6   | 32444330   | 0.9                  | 0.97    | <a href="#">rs12207473</a>  | A            | C   | 0.44     |                        |       |                |              | 7 altered motifs    | 32kb 3' of HLA-DRA |                  |
| 6   | 32444544   | 0.89                 | 0.94    | <a href="#">rs12195582</a>  | C            | T   | 0.46     |                        |       |                |              |                     | 32kb 3' of HLA-DRA |                  |
| 6   | 32444733   | 0.9                  | 0.96    | <a href="#">rs113660101</a> | T<br>G       | T   | 0.45     |                        |       |                |              | GATA,SIX5           | 32kb 3' of HLA-DRA |                  |
| 6   | 32445079   | 0.92                 | 0.98    | <a href="#">rs28895255</a>  | C            | T   | 0.45     |                        |       |                |              | NF-kappaB,Rad21     | 32kb 3' of HLA-DRA |                  |
| 6   | 32445114   | 0.87                 | 0.98    | <a href="#">rs28895257</a>  | A            | G   | 0.43     |                        |       |                |              | Foxp3               | 32kb 3' of HLA-DRA |                  |
| 6   | 32445117   | 0.87                 | 0.98    | <a href="#">rs28895258</a>  | C            | T   | 0.43     |                        |       |                |              | AP-1,p53            | 32kb 3' of HLA-DRA |                  |
| 6   | 32445306   | 0.88                 | 0.99    | <a href="#">rs28895261</a>  | G            | A   | 0.43     |                        |       |                |              | AhR::Arnt,Arnt,BDP1 | 32kb 3' of HLA-DRA |                  |
| 6   | 32445691   | 0.92                 | 0.96    | <a href="#">rs9378212</a>   | C            | T   | 0.46     |                        | MCF-7 | CTCF           |              | 5 altered motifs    | 33kb 3' of HLA-DRA |                  |
| 6   | 32445992   | 0.91                 | 0.98    | <a href="#">rs17209866</a>  | G            | A   | 0.44     |                        |       |                |              | Pitx2               | 33kb 3' of HLA-DRA |                  |
| 6   | 32446010   | 0.91                 | 0.96    | <a href="#">rs17209873</a>  | T            | C   | 0.46     |                        |       |                |              | Pbx-1,Rhox11        | 33kb 3' of HLA-DRA |                  |
| 6   | 32446051   | 0.93                 | 0.98    | <a href="#">rs17209887</a>  | A            | C   | 0.45     |                        |       |                |              |                     | 33kb 3' of HLA-DRA |                  |
| 6   | 32446071   | 0.95                 | 0.98    | <a href="#">rs17203514</a>  | C            | G   | 0.45     |                        |       |                |              | Hoxa5               | 33kb 3' of HLA-DRA |                  |
| 6   | 32446307   | 0.86                 | 0.96    | <a href="#">rs17203549</a>  | T            | C   | 0.44     |                        |       |                |              | Pax-5               | 33kb 3' of HLA-DRA |                  |
| 6   | 32446425   | 0.83                 | 0.98    | <a href="#">rs139916710</a> | G<br>AA<br>T | G   | 0.42     |                        |       |                |              | 4 altered motifs    | 34kb 3' of HLA-DRA |                  |

|   |          |      |      |                            |   |               |      |         |                     |                     |
|---|----------|------|------|----------------------------|---|---------------|------|---------|---------------------|---------------------|
| 6 | 32446459 | 0.86 | 0.99 | <a href="#">rs17203563</a> | G | A,<br>C,<br>T | 0.42 |         |                     | 34kb 3' of HLA-DRA  |
| 6 | 32446853 | 1    | 1    | <a href="#">rs17203612</a> | A | T             | 0.46 |         | 8 altered motifs    | 34kb 3' of HLA-DRA  |
| 6 | 32446922 | 0.89 | 1    | <a href="#">rs17203619</a> | T | C             | 0.43 |         |                     | 34kb 3' of HLA-DRA  |
| 6 | 32446994 | 0.81 | 1    | <a href="#">rs17203626</a> | G | A,<br>T       | 0.41 |         |                     | 34kb 3' of HLA-DRA  |
| 6 | 32447014 | 0.95 | 1    | <a href="#">rs17203636</a> | G | A             | 0.45 |         | Pou3f2,Sox          | 34kb 3' of HLA-DRA  |
| 6 | 32447111 | 0.95 | 1    | <a href="#">rs29001652</a> | A | G             | 0.45 | H7-hESC | Glis2,NERF1a        | 34kb 3' of HLA-DRA  |
| 6 | 32447162 | 0.96 | 0.99 | <a href="#">rs29001478</a> | G | A             | 0.45 | H7-hESC | 4 altered motifs    | 34kb 3' of HLA-DRA  |
| 6 | 32447216 | 0.96 | 0.99 | <a href="#">rs29001620</a> | A | T             | 0.45 | H7-hESC | NRSF,Sin3Ak-20      | 34kb 3' of HLA-DRA  |
| 6 | 32447219 | 0.96 | 0.99 | <a href="#">rs28732246</a> | G | A             | 0.45 | H7-hESC | NRSF,PU.1,Sin3Ak-20 | 34kb 3' of HLA-DRA  |
| 6 | 32447341 | 0.96 | 0.99 | <a href="#">rs29001568</a> | G | A             | 0.45 |         | Maf,Nkx2,RXRA       | 35kb 3' of HLA-DRA  |
| 6 | 32447715 | 0.92 | 0.99 | <a href="#">rs4994859</a>  | A | G             | 0.44 |         | 4 altered motifs    | 35kb 3' of HLA-DRA  |
| 6 | 32447873 | 0.92 | 0.99 | <a href="#">rs4994855</a>  | A | G             | 0.44 |         | 6 altered motifs    | 35kb 3' of HLA-DRA  |
| 6 | 32447900 | 0.91 | 0.99 | <a href="#">rs4994854</a>  | T | C             | 0.44 |         | Pax-4,Sox           | 35kb 3' of HLA-DRA  |
| 6 | 32448129 | 0.81 | 0.99 | <a href="#">rs4410767</a>  | T | C             | 0.41 |         | GATA,Irf            | 35kb 3' of HLA-DRA  |
| 6 | 32449138 | 0.9  | 0.97 | <a href="#">rs9394098</a>  | C | T             | 0.44 |         | Smad3               | 36kb 3' of HLA-DRB5 |
| 6 | 32449160 | 0.87 | 0.97 | <a href="#">rs9394099</a>  | G | T             | 0.44 |         | 6 altered motifs    | 36kb 3' of HLA-DRB5 |
| 6 | 32449188 | 0.86 | 0.96 | <a href="#">rs9394100</a>  | G | A             | 0.47 |         | Pou5f1              | 36kb 3' of HLA-DRB5 |
| 6 | 32449198 | 0.85 | 0.94 | <a href="#">rs9394101</a>  | A | G             | 0.46 |         | Irf,TEF             | 36kb 3' of HLA-DRB5 |
| 6 | 32449293 | 0.87 | 0.97 | <a href="#">rs5018660</a>  | A | G             | 0.44 |         | Dmbx1,Mef2,OTX      | 36kb 3' of HLA-DRB5 |
| 6 | 32449411 | 0.85 | 0.97 | <a href="#">rs1964995</a>  | T | C             | 0.43 |         | 5 altered motifs    | 36kb 3' of HLA-DRB5 |
| 6 | 32450089 | 0.87 | 0.98 | <a href="#">rs5020946</a>  | G | T             | 0.43 | GM12878 | AP-2,STAT           | 35kb 3' of HLA-DRB5 |
| 6 | 32450678 | 0.83 | 0.96 | <a href="#">rs34452456</a> | T | C             | 0.44 | GM12878 | Pax-4               | 34kb 3' of HLA-DRB5 |
| 6 | 32451570 | 0.81 | 0.92 | <a href="#">rs13194770</a> | C | T             | 0.45 |         | 5 altered motifs    | 34kb 3' of HLA-DRB5 |

H7-hESC  
H7-hESC  
H7-hESC  
H7-hESC

Monocyt es-CD14+\_RO01746  
GM12878

**Table S15. Results from HaploReg analysis of HLA follicular lymphoma risk loci and their correlated ( $r^2 > 0.80$ ) surrogates.**

### 3. SUPPLEMENTAL NOTES

#### NOTE S1: ACKNOWLEDGEMENTS

##### Support for individual studies:

**ATBC** – Intramural Research Program of the National Institutes of Health, NCI, Division of Cancer Epidemiology and Genetics. U.S. Public Health Service contracts (N01-CN-45165, N01-RC-45035, N01-RC-37004).

**BC** (J.S., A.B.W.) – Canadian Institutes for Health Research (CIHR). Canadian Cancer Society. Michael Smith Foundation for Health Research.

**CPSII** (L.T.) – The American Cancer Society funds the creation, maintenance, and updating of the CPSII cohort. The authors thank the CPS-II participants and Study Management Group for their invaluable contributions to this research. The authors would also like to acknowledge the contribution to this study from central cancer registries supported through the Centers for Disease Control and Prevention National Program of Cancer Registries, and cancer registries supported by the National Cancer Institute Surveillance Epidemiology and End Results program.

**ELCCS** (E.R.) - Leukaemia & Lymphoma Research.

**ENGELA** (J.C.) – Fondation ARC pour la Recherche sur le Cancer. Fondation de France. French Agency for Food, Environmental and Occupational Health & Safety (ANSES), the French National Cancer Institute (INCa).

**EPIC** (E.R.) – Coordinated Action (Contract #006438, SP23-CT-2005-006438). HuGeF (Human Genetics Foundation), Torino, Italy.

**EPILYMPH** – European Commission (grant references QLK4-CT-2000-00422 and FOOD-CT-2006-023103); the Spanish Ministry of Health (grant references CIBERESP, PI11/01810, RCESP C03/09, RTICESP C03/10 and RTIC RD06/0020/0095), the Marató de TV3 Foundation (grant reference 051210), the Agència de Gestió d'Ajuts Universitaris de Recerca – Generalitat de Catalunya (grant reference 2009SGR1465) who had no role in the data collection, analysis or interpretation of the results; the NIH (contract NO1-CO-12400); the Compagnia di San Paolo—Programma Oncologia; the Federal Office for Radiation Protection grants StSch4261 and StSch4420, the José Carreras Leukemia Foundation grant DJCLS-R12/23, the German Federal Ministry for Education and Research (BMBF-01-EO-1303); the Health Research Board, Ireland and Cancer Research Ireland; Czech Republic supported by MH CZ – DRO (MMCI, 00209805) and RECAMO, CZ.1.05/2.1.00/03.0101; Fondation de France and Association de Recherche Contre le Cancer.

**HPFS** (Walter C. Willet) – The HPFS was supported in part by National Institutes of Health grants CA167552, CA149445, CA098122, CA098566 (K.A.B.), and K07 CA115687 (B.M.B.). We would like to thank the participants and staff of the Health Professionals Follow-up Study for their valuable contributions as well as the following state cancer registries for their help: AL, AZ, AR, CA, CO, CT, DE, FL, GA, ID, IL, IN, IA, KY, LA, ME, MD, MA, MI, NE, NH, NJ, NY, NC, ND, OH, OK, OR, PA, RI, SC, TN, TX, VA, WA, WY. In addition, this study was approved by the Connecticut Department of Public Health (DPH) Human Investigations Committee. Certain data used in this publication were obtained from the DPH. The authors assume full responsibility for analyses and interpretation of these data.



**Iowa-Mayo SPORE** (G.W., J.R.C., T.E.W.) – National Institutes of Health (CA97274). Specialized Programs of Research Excellence (SPORE) in Human Cancer (P50 CA97274). Molecular Epidemiology of Non-Hodgkin Lymphoma Survival (R01 CA129539).

**Italian GxE** (P.C.) - Italian Ministry for Education, University and Research Research (PRIN 2007 prot.2007WEJLZB, PRIN 2009 prot. 20092ZELR2); the Italian Association for Cancer Research (AIRC, Investigator Grant 11855). (M.G.E.) - Regional Law N. 7, 2007: “Basic research” (Progetti di ricerca fondamentale o di base) by the Regional Administration of Sardinia (CRP-59812/2012), Fondazione Banco di Sardegna 2010-2012.

**LYSA** (G.S, H.G) – Institut National du Cancer (INCa, Paris) grant 2008-020

**Mayo Clinic Case-Control** (J.R.C.) – National Institutes of Health (R01 CA92153).

**MCCS** (G.G.G., G.S.) – The Melbourne Collaborative Cohort Study recruitment was funded by VicHealth and Cancer Council Victoria. The MCCS was further supported by Australian NHMRC grants 209057, 251553 and 504711 and by infrastructure provided by Cancer Council Victoria.

**MD Anderson** (X.W.) - Institutional support to the Center for Translational and Public Health Genomics.

**MSKCC** (K.O.) – Geoffrey Beene Cancer Research Grant, Lymphoma Foundation (LF5541). Barbara K. Lipman Lymphoma Research Fund (74419). Robert and Kate Niehaus Clinical Cancer Genetics Research Initiative (57470), U01 HG007033.

**NCI-SEER** – Intramural Research Program of the National Cancer Institute, National Institutes of Health, and Public Health Service (N01-PC-65064, N01-PC-67008, N01-PC-67009, N01-PC-67010, N02-PC-71105).

**NHS** (Meir J. Stampfer) – The NHS was supported in part by National Institutes of Health grants CA87969, CA49449, CA149445, CA098122, CA134958, CA098566 (K.A.B.), and K07 CA115687 (B.M.B.). We would like to thank the participants and staff of the Nurses' Health Study for their valuable contributions as well as the following state cancer registries for their help: AL, AZ, AR, CA, CO, CT, DE, FL, GA, ID, IL, IN, IA, KY, LA, ME, MD, MA, MI, NE, NH, NJ, NY, NC, ND, OH, OK, OR, PA, RI, SC, TN, TX, VA, WA, WY. In addition, this study was approved by the Connecticut Department of Public Health (DPH) Human Investigations Committee. Certain data used in this publication were obtained from the DPH. The authors assume full responsibility for analyses and interpretation of these data.

**NSW** (C.M.Vajdic) - was supported by grants from the Australian National Health and Medical Research Council (ID990920), the Cancer Council NSW, and the University of Sydney Faculty of Medicine.

**NYUWHS** - National Cancer Institute (R01 CA098661, P30 CA016087). National Institute of Environmental Health Sciences (ES000260).

**PLCO** - This research was supported by the Intramural Research Program of the National Cancer Institute and by contracts from the Division of Cancer Prevention, National Cancer Institute, NIH, DHHS.

**SCALE** (K.E.S., H.O.A., H.H.) – Swedish Cancer Society (2009/659). Stockholm County Council (20110209) and the Strategic Research Program in Epidemiology at Karolinska Institute. Swedish Cancer Society grant (02 6661). Danish Cancer Research Foundation Grant. Lundbeck Foundation Grant (R19-A2364).

Danish Cancer Society Grant (DP 08-155). National Institutes of Health (5R01 CA69669-02). Plan Denmark.

**UCSF/UCSF2** (C.F.S.)- These studies were supported by the NCI, National Institutes of Health, grants CA1046282 and CA154643 (C.F.S.), and R01CA87014, R01CA45614, R03CA14397, and R03CA150037 (E.A.H., P.M.B). The collection of cancer incidence data used in this study was supported by the California Department of Health Services as part of the statewide cancer reporting program mandated by California Health and Safety Code Section 103885; the National Cancer Institute's Surveillance, Epidemiology, and End Results Program under contract HHSN261201000140C awarded to the Cancer Prevention Institute of California, contract HHSN261201000035C awarded to the University of Southern California, and contract HHSN261201000034C awarded to the Public Health Institute; and the Centers for Disease Control and Prevention's National Program of Cancer Registries, under agreement #1U58 DP000807-01 awarded to the Public Health Institute. The ideas and opinions expressed herein are those of the authors, and endorsement by the State of California, the California Department of Health Services, the National Cancer Institute, or the Centers for Disease Control and Prevention or their contractors and subcontractors is not intended nor should be inferred.

**WHI** – WHI investigators are: *Program Office* - (National Heart, Lung, and Blood Institute, Bethesda, Maryland) Jacques Rossouw, Shari Ludlam, Dale Burwen, Joan McGowan, Leslie Ford, and Nancy Geller; *Clinical Coordinating Center* - (Fred Hutchinson Cancer Research Center, Seattle, WA) Garnet Anderson, Ross Prentice, Andrea LaCroix, and Charles Kooperberg; *Investigators and Academic Centers* - (Brigham and Women's Hospital, Harvard Medical School, Boston, MA) JoAnn E. Manson; (MedStar Health Research Institute/Howard University, Washington, DC) Barbara V. Howard; (Stanford Prevention Research Center, Stanford, CA) Marcia L. Stefanick; (The Ohio State University, Columbus, OH) Rebecca Jackson; (University of Arizona, Tucson/Phoenix, AZ) Cynthia A. Thomson; (University at Buffalo, Buffalo, NY) Jean Wactawski-Wende; (University of Florida, Gainesville/Jacksonville, FL) Marian Limacher; (University of Iowa, Iowa City/Davenport, IA) Robert Wallace; (University of Pittsburgh, Pittsburgh, PA) Lewis Kuller; (Wake Forest University School of Medicine, Winston-Salem, NC) Sally Shumaker; *Women's Health Initiative Memory Study* - (Wake Forest University School of Medicine, Winston-Salem, NC) Sally Shumaker. The WHI program is funded by the National Heart, Lung, and Blood Institute, National Institutes of Health, U.S. Department of Health and Human Services through contracts HHSN268201100046C, HHSN268201100001C, HHSN268201100002C, HHSN268201100003C, HHSN268201100004C, and HHSN271201100004C.

**YALE** (T.Z.) – National Cancer Institute (CA62006).

#### 4. SUPPLEMENTAL REFERENCES

1. (1994). The alpha-tocopherol, beta-carotene lung cancer prevention study: design, methods, participant characteristics, and compliance. The ATBC Cancer Prevention Study Group. *Annals of epidemiology* 4, 1-10.
2. Calle, E.E., Rodriguez, C., Jacobs, E.J., Almon, M.L., Chao, A., McCullough, M.L., Feigelson, H.S., and Thun, M.J. (2002). The American Cancer Society Cancer Prevention Study II Nutrition Cohort: rationale, study design, and baseline characteristics. *Cancer* 94, 500-511.
3. Riboli, E., and Kaaks, R. (1997). The EPIC Project: rationale and study design. *European Prospective Investigation into Cancer and Nutrition. International journal of epidemiology* 26 Suppl 1, S6-14.
4. Riboli, E., Hunt, K.J., Slimani, N., Ferrari, P., Norat, T., Fahey, M., Charrondiere, U.R., Hemon, B., Casagrande, C., Vignat, J., et al. (2002). European Prospective Investigation into Cancer and Nutrition (EPIC): study populations and data collection. *Public health nutrition* 5, 1113-1124.
5. Rimm, E.B., Giovannucci, E.L., Willett, W.C., Colditz, G.A., Ascherio, A., Rosner, B., and Stampfer, M.J. (1991). Prospective study of alcohol consumption and risk of coronary disease in men. *Lancet* 338, 464-468.
6. Giles, G.G., and English, D.R. (2002). The Melbourne Collaborative Cohort Study. *IARC scientific publications* 156, 69-70.
7. Colditz, G.A., and Hankinson, S.E. (2005). The Nurses' Health Study: lifestyle and health among women. *Nature reviews Cancer* 5, 388-396.
8. Hankinson, S.E., Willett, W.C., Manson, J.E., Hunter, D.J., Colditz, G.A., Stampfer, M.J., Longcope, C., and Speizer, F.E. (1995). Alcohol, height, and adiposity in relation to estrogen and prolactin levels in postmenopausal women. *Journal of the National Cancer Institute* 87, 1297-1302.
9. Toniolo, P.G., Levitz, M., Zeleniuch-Jacquotte, A., Banerjee, S., Koenig, K.L., Shore, R.E., Strax, P., and Pasternack, B.S. (1995). A prospective study of endogenous estrogens and breast cancer in postmenopausal women. *Journal of the National Cancer Institute* 87, 190-197.
10. Gu, Y., Shore, R.E., Arslan, A.A., Koenig, K.L., Liu, M., Ibrahim, S., Lokshin, A.E., and Zeleniuch-Jacquotte, A. (2010). Circulating cytokines and risk of B-cell non-Hodgkin lymphoma: a prospective study. *Cancer causes & control : CCC* 21, 1323-1333.
11. Troy, J.D., Hartge, P., Weissfeld, J.L., Oken, M.M., Colditz, G.A., Mechanic, L.E., and Morton, L.M. (2010). Associations between anthropometry, cigarette smoking, alcohol consumption, and non-Hodgkin lymphoma in the Prostate, Lung, Colorectal, and Ovarian Cancer Screening Trial. *American journal of epidemiology* 171, 1270-1281.
12. Hayes, R.B., Sigurdson, A., Moore, L., Peters, U., Huang, W.Y., Pinsky, P., Reding, D., Gelmann, E.P., Rothman, N., Pfeiffer, R.M., et al. (2005). Methods for etiologic and early marker investigations in the PLCO trial. *Mutation research* 592, 147-154.
13. Anderson, G.L., Manson, J., Wallace, R., Lund, B., Hall, D., Davis, S., Shumaker, S., Wang, C.Y., Stein, E., and Prentice, R.L. (2003). Implementation of the Women's Health Initiative study design. *Annals of epidemiology* 13, S5-17.
14. Spinelli, J.J., Ng, C.H., Weber, J.P., Connors, J.M., Gascoyne, R.D., Lai, A.S., Brooks-Wilson, A.R., Le, N.D., Berry, B.R., and Gallagher, R.P. (2007). Organochlorines and risk of non-Hodgkin lymphoma. *International journal of cancer Journal international du cancer* 121, 2767-2775.
15. Willett, E.V., Smith, A.G., Dovey, G.J., Morgan, G.J., Parker, J., and Roman, E. (2004). Tobacco and alcohol consumption and the risk of non-Hodgkin lymphoma. *Cancer causes & control : CCC* 15, 771-780.

16. Worrillow, L., Roman, E., Adamson, P.J., Kane, E., Allan, J.M., and Lightfoot, T.J. (2009). Polymorphisms in the nucleotide excision repair gene ERCC2/XPD and risk of non-Hodgkin lymphoma. *Cancer epidemiology* 33, 257-260.
17. Crouch, S., Simpson, J., Ansell, P., Kane, E., Howell, D., Smith, A., Newton, R., Jack, A., and Roman, E. (2011). Illness patterns prior to diagnosis of lymphoma: analysis of UK medical records. *Cancer epidemiology* 35, 145-150.
18. Chatterjee, N., Hartge, P., Cerhan, J.R., Cozen, W., Davis, S., Ishibe, N., Colt, J., Goldin, L., and Severson, R.K. (2004). Risk of non-Hodgkin's lymphoma and family history of lymphatic, hematologic, and other cancers. *Cancer epidemiology, biomarkers & prevention : a publication of the American Association for Cancer Research, cosponsored by the American Society of Preventive Oncology* 13, 1415-1421.
19. Wang, S.S., Cerhan, J.R., Hartge, P., Davis, S., Cozen, W., Severson, R.K., Chatterjee, N., Yeager, M., Chanock, S.J., and Rothman, N. (2006). Common genetic variants in proinflammatory and other immunoregulatory genes and risk for non-Hodgkin lymphoma. *Cancer research* 66, 9771-9780.
20. Hughes, A.M., Armstrong, B.K., Vajdic, C.M., Turner, J., Grulich, A., Fritschi, L., Milliken, S., Kaldor, J., Benke, G., and Krickler, A. (2004). Pigmentary characteristics, sun sensitivity and non-Hodgkin lymphoma. *International journal of cancer Journal international du cancer* 110, 429-434.
21. Smedby, K.E., Hjalgrim, H., Melbye, M., Torrang, A., Rostgaard, K., Munksgaard, L., Adami, J., Hansen, M., Porwit-MacDonald, A., Jensen, B.A., et al. (2005). Ultraviolet radiation exposure and risk of malignant lymphomas. *Journal of the National Cancer Institute* 97, 199-209.
22. Skibola, C.F., Bracci, P.M., Halperin, E., Nieters, A., Hubbard, A., Paynter, R.A., Skibola, D.R., Agana, L., Becker, N., Tressler, P., et al. (2008). Polymorphisms in the estrogen receptor 1 and vitamin C and matrix metalloproteinase gene families are associated with susceptibility to lymphoma. *PLoS one* 3, e2816.
23. Zhang, Y., Hughes, K.J., Zahm, S.H., Zhang, Y., Holford, T.R., Dai, L., Bai, Y., Han, X., Qin, Q., Lan, Q., et al. (2009). Genetic variations in xenobiotic metabolic pathway genes, personal hair dye use, and risk of non-Hodgkin lymphoma. *American journal of epidemiology* 170, 1222-1230.
24. Monnereau, A., Orsi, L., Troussard, X., Berthou, C., Fenaux, P., Soubeyran, P., Marit, G., Huguet, F., Milpied, N., Leporrier, M., et al. (2008). Cigarette smoking, alcohol drinking, and risk of lymphoid neoplasms: results of a French case-control study. *Cancer causes & control : CCC* 19, 1147-1160.
25. Besson, H., Brennan, P., Becker, N., Nieters, A., De Sanjose, S., Font, R., Maynadie, M., Foretova, L., Cocco, P.L., Staines, A., et al. (2006). Tobacco smoking, alcohol drinking and non-Hodgkin's lymphoma: A European multicenter case-control study (EpiLymph). *International journal of cancer Journal international du cancer* 119, 901-908.
26. Drake, M.T., Maurer, M.J., Link, B.K., Habermann, T.M., Ansell, S.M., Micallef, I.N., Kelly, J.L., Macon, W.R., Nowakowski, G.S., Inwards, D.J., et al. (2010). Vitamin D insufficiency and prognosis in non-Hodgkin's lymphoma. *Journal of clinical oncology : official journal of the American Society of Clinical Oncology* 28, 4191-4198.
27. Cerhan, J.R., Fredericksen, Z.S., Wang, A.H., Habermann, T.M., Kay, N.E., Macon, W.R., Cunningham, J.M., Shanafelt, T.D., Ansell, S.M., Call, T.G., et al. (2011). Design and validity of a clinic-based case-control study on the molecular epidemiology of lymphoma. *International journal of molecular epidemiology and genetics* 2, 95-113.
28. Yossepowitch, O., Olvera, N., Satagopan, J.M., Huang, H., Jhanwar, S., Rapaport, B., Boyd, J., and Offit, K. (2003). BRCA1 and BRCA2 germline mutations in lymphoma patients. *Leukemia & lymphoma* 44, 127-131.
29. Vijai, J., Kirchhoff, T., Schrader, K.A., Brown, J., Dutra-Clarke, A.V., Manschreck, C., Hansen, N., Rau-Murthy, R., Sarrel, K., Przybylo, J., et al. (2013). Susceptibility loci associated with specific and shared subtypes of lymphoid malignancies. *PLoS genetics* 9, e1003220.

30. Salles, G., Seymour, J.F., Offner, F., Lopez-Guillermo, A., Belada, D., Xerri, L., Feugier, P., Bouabdallah, R., Catalano, J.V., Brice, P., et al. (2011). Rituximab maintenance for 2 years in patients with high tumour burden follicular lymphoma responding to rituximab plus chemotherapy (PRIMA): a phase 3, randomised controlled trial. *Lancet* 377, 42-51.
31. De Vivo, I., Prescott, J., Setiawan, V.W., Olson, S.H., Wentzensen, N., Australian National Endometrial Cancer Study, G., Attia, J., Black, A., Brinton, L., Chen, C., et al. (2014). Genome-wide association study of endometrial cancer in E2C2. *Human genetics* 133, 211-224.
32. Holly, E.A., and Bracci, P.M. (2003). Population-based study of non-Hodgkin lymphoma, histology, and medical history among human immunodeficiency virus-negative participants in San Francisco. *American journal of epidemiology* 158, 316-327.
33. Morton, L.M., Turner, J.J., Cerhan, J.R., Linet, M.S., Treseler, P.A., Clarke, C.A., Jack, A., Cozen, W., Maynadie, M., Spinelli, J.J., et al. (2007). Proposed classification of lymphoid neoplasms for epidemiologic research from the Pathology Working Group of the International Lymphoma Epidemiology Consortium (InterLymph). *Blood* 110, 695-708.
34. Turner, J.J., Morton, L.M., Linet, M.S., Clarke, C.A., Kadin, M.E., Vajdic, C.M., Monnereau, A., Maynadie, M., Chiu, B.C., Marcos-Gragera, R., et al. (2010). InterLymph hierarchical classification of lymphoid neoplasms for epidemiologic research based on the WHO classification (2008): update and future directions. *Blood* 116, e90-98.
35. Ansel, K.M., Ngo, V.N., Hyman, P.L., Luther, S.A., Forster, R., Sedgwick, J.D., Browning, J.L., Lipp, M., and Cyster, J.G. (2000). A chemokine-driven positive feedback loop organizes lymphoid follicles. *Nature* 406, 309-314.
36. Saez de Guinoa, J., Barrio, L., Mellado, M., and Carrasco, Y.R. (2011). CXCL13/CXCR5 signaling enhances BCR-triggered B-cell activation by shaping cell dynamics. *Blood* 118, 1560-1569.
37. Charbonneau, B., Wang, A.H., Maurer, M.J., Asmann, Y.W., Zent, C.S., Link, B.K., Ansell, S.M., Weiner, G.J., Ozsan, N., Feldman, A.L., et al. (2013). CXCR5 polymorphisms in non-Hodgkin lymphoma risk and prognosis. *Cancer immunology, immunotherapy : CII* 62, 1475-1484.
38. Russell, L., and Garrett-Sinha, L.A. (2010). Transcription factor Ets-1 in cytokine and chemokine gene regulation. *Cytokine* 51, 217-226.
39. Grunewald, T.G., Pasedag, S.M., and Butt, E. (2009). Cell Adhesion and Transcriptional Activity - Defining the Role of the Novel Protooncogene LPP. *Translational oncology* 2, 107-116.
40. Tan, D.E., Foo, J.N., Bei, J.X., Chang, J., Peng, R., Zheng, X., Wei, L., Huang, Y., Lim, W.Y., Li, J., et al. (2013). Genome-wide association study of B cell non-Hodgkin lymphoma identifies 3q27 as a susceptibility locus in the Chinese population. *Nature genetics* 45, 804-807.
41. Yunis, J.J., Frizzera, G., Oken, M.M., McKenna, J., Theologides, A., and Arnesen, M. (1987). Multiple recurrent genomic defects in follicular lymphoma. A possible model for cancer. *The New England journal of medicine* 316, 79-84.
42. Berndt, S.I., Skibola, C.F., Joseph, V., Camp, N.J., Nieters, A., Wang, Z., Cozen, W., Monnereau, A., Wang, S.S., Kelly, R.S., et al. (2013). Genome-wide association study identifies multiple risk loci for chronic lymphocytic leukemia. *Nature genetics* 45, 868-876.
43. Graham, M., and Adams, J.M. (1986). Chromosome 8 breakpoint far 3' of the c-myc oncogene in a Burkitt's lymphoma 2;8 variant translocation is equivalent to the murine pvt-1 locus. *The EMBO journal* 5, 2845-2851.
44. Tsutsumi, Y., Chinen, Y., Sakamoto, N., Nagoshi, H., Nishida, K., Kobayashi, S., Yokokawa, Y., Taki, T., Sasaki, N., Yamamoto-Sugitani, M., et al. (2013). Deletion or methylation of CDKN2A/2B and PVT1 rearrangement occur frequently in highly aggressive B-cell lymphomas harboring 8q24 abnormality. *Leukemia & lymphoma* 54, 2760-2764.
45. Enciso-Mora, V., Broderick, P., Ma, Y., Jarrett, R.F., Hjalgrim, H., Hemminki, K., van den Berg, A., Olver, B., Lloyd, A., Dobbins, S.E., et al. (2010). A genome-wide association study of Hodgkin's

- lymphoma identifies new susceptibility loci at 2p16.1 (REL), 8q24.21 and 10p14 (GATA3). *Nature genetics* 42, 1126-1130.
46. Crowther-Swanepoel, D., and Houlston, R.S. (2010). Genetic variation and risk of chronic lymphocytic leukaemia. *Seminars in cancer biology* 20, 363-369.
  47. Gudmundsson, J., Sulem, P., Gudbjartsson, D.F., Blondal, T., Gylfason, A., Agnarsson, B.A., Benediktsdottir, K.R., Magnusdottir, D.N., Orlygsdottir, G., Jakobsdottir, M., et al. (2009). Genome-wide association and replication studies identify four variants associated with prostate cancer susceptibility. *Nature genetics* 41, 1122-1126.
  48. Rothman, N., Garcia-Closas, M., Chatterjee, N., Malats, N., Wu, X., Figueroa, J.D., Real, F.X., Van Den Berg, D., Matullo, G., Baris, D., et al. (2010). A multi-stage genome-wide association study of bladder cancer identifies multiple susceptibility loci. *Nature genetics* 42, 978-984.
  49. Michailidou, K., Hall, P., Gonzalez-Neira, A., Ghoussaini, M., Dennis, J., Milne, R.L., Schmidt, M.K., Chang-Claude, J., Bojesen, S.E., Bolla, M.K., et al. (2013). Large-scale genotyping identifies 41 new loci associated with breast cancer risk. *Nature genetics* 45, 353-361, 361e351-352.
  50. Zanke, B.W., Greenwood, C.M., Rangrej, J., Kustra, R., Tenesa, A., Farrington, S.M., Prendergast, J., Olschwang, S., Chiang, T., Crowdy, E., et al. (2007). Genome-wide association scan identifies a colorectal cancer susceptibility locus on chromosome 8q24. *Nature genetics* 39, 989-994.
  51. Tomlinson, I., Webb, E., Carvajal-Carmona, L., Broderick, P., Kemp, Z., Spain, S., Penegar, S., Chandler, I., Gorman, M., Wood, W., et al. (2007). A genome-wide association scan of tag SNPs identifies a susceptibility variant for colorectal cancer at 8q24.21. *Nature genetics* 39, 984-988.
  52. Skibola, C.F., Bracci, P.M., Halperin, E., Conde, L., Craig, D.W., Agana, L., Iyadurai, K., Becker, N., Brooks-Wilson, A., Curry, J.D., et al. (2009). Genetic variants at 6p21.33 are associated with susceptibility to follicular lymphoma. *Nature genetics* 41, 873-875.
  53. Nieters, A., Conde, L., Slager, S.L., Brooks-Wilson, A., Morton, L., Skibola, D.R., Novak, A.J., Riby, J., Ansell, S.M., Halperin, E., et al. (2012). PRRC2A and BCL2L1 gene variants influence risk of non-Hodgkin lymphoma: results from the InterLymph consortium. *Blood* 120, 4645-4648.
  54. Smedby, K.E., Foo, J.N., Skibola, C.F., Darabi, H., Conde, L., Hjalgrim, H., Kumar, V., Chang, E.T., Rothman, N., Cerhan, J.R., et al. (2011). GWAS of follicular lymphoma reveals allelic heterogeneity at 6p21.32 and suggests shared genetic susceptibility with diffuse large B-cell lymphoma. *PLoS genetics* 7, e1001378.
  55. Conde, L., Halperin, E., Akers, N.K., Brown, K.M., Smedby, K.E., Rothman, N., Nieters, A., Slager, S.L., Brooks-Wilson, A., Agana, L., et al. (2010). Genome-wide association study of follicular lymphoma identifies a risk locus at 6p21.32. *Nature genetics* 42, 661-664.
  56. Cerhan, J.R., Fredericksen, Z.S., Novak, A.J., Ansell, S.M., Kay, N.E., Liebow, M., Dogan, A., Cunningham, J.M., Wang, A.H., Witzig, T.E., et al. (2012). A two-stage evaluation of genetic variation in immune and inflammation genes with risk of non-Hodgkin lymphoma identifies new susceptibility locus in 6p21.3 region. *Cancer epidemiology, biomarkers & prevention : a publication of the American Association for Cancer Research, cosponsored by the American Society of Preventive Oncology* 21, 1799-1806.
  57. Wang, S.S., Abdou, A.M., Morton, L.M., Thomas, R., Cerhan, J.R., Gao, X., Cozen, W., Rothman, N., Davis, S., Severson, R.K., et al. (2010). Human leukocyte antigen class I and II alleles in non-Hodgkin lymphoma etiology. *Blood* 115, 4820-4823.
  58. Skibola, C.F., Akers, N.K., Conde, L., Ladner, M., Hawbecker, S.K., Cohen, F., Ribas, F., Erlich, H.A., Goodridge, D., Trachtenberg, E.A., et al. (2012). Multi-locus HLA class I and II allele and haplotype associations with follicular lymphoma. *Tissue antigens* 79, 279-286.
  59. Foo, J.N., Smedby, K.E., Akers, N.K., Berglund, M., Irwan, I.D., Jia, X., Li, Y., Conde, L., Darabi, H., Bracci, P.M., et al. (2013). Coding variants at hexa-allelic amino acid 13 of HLA-DRB1 explain

independent SNP associations with follicular lymphoma risk. American journal of human genetics 93, 167-172.
